# Supplementary material
Source: PubMed Central journal article supplement (PMC4059116)
Supplement: supp_M113.537118_jbc.M113.537118-1.pdf [file supp_M113.537118_jbc.M113.537118-1.pdf]

**Araujo et al.,**

## **A novel intracellular peptide derived from G1/S cyclin D2 induces cell death**

### **Supplementary data from MS and MS/MS analyses**

All Mascot results shown here were manually checked, and this was necessary for several reasons, as previously described (Castro, L. M., Berti, D. A., et al. (2010). *AAPS Journal* **12**, 608-616; Fricker, L. D., Gelman, J. S., et al. (2012). *J Proteome Res* **11**, 1981-1990; Gelman, J. S., Wardman, et al. (2012). *Methods Mol Biol* **829**, 487-503; Lyons, P. J., and Fricker, L. D. (2011) *Curr Protoc Protein Sci* **Chapter 18**, Unit18 13).

The peptides being analyzed represent endogenous peptides and not tryptic fragments; therefore a larger number of false positives are possible without the constraints of Lys/Arg residues of the tryptic cleavage site. Secondly, the isotopic tags present several features that are not considered by Mascot, and which therefore are not listed as “matched” ions. For example, neutral loss of trimethylamine from the parent ion is not considered by Mascot, but often represents one of the major peaks in the MS/MS spectra. In contrast, neutral loss is very common for the fragment ions, and this is considered by the Mascot program. However, neutral loss does not always occur for the fragment ions and this is not considered by Mascot. Therefore, fragment ions that contain the intact TMAB label are not assigned by Mascot. Finally, some a ions are abundant for most peptides, especially the a<sub>2</sub> ion. Although a ions could be considered by Mascot, we found it was optimal to run the initial Mascot analysis without consideration of a-ions in order to decrease the rate of false positives.

Because of these issues, there are often several major peaks in the MS/MS spectra that are not assigned by Mascot, and so manual interpretation is necessary to assign these peaks. In general, the peptides assigned to the spectra corresponded to the top score of the Mascot search results. However, in some cases two or more peptides were equally likely, differing only in Leu/Ile. When a longer fragment of the same peptide was also found and unambiguously identified by Mascot and the manual interpretation, then the shorter peptide corresponding to

this fragment was considered to also be correct. The following MS/MS spectra are arranged in alphabetical order of the peptide sequence and animal tissue sample. The indicated parent mass in the spectra do not match that in the supplemental tables. The mass in these tables represents the theoretical monoisotopic mass of the peptide without isotopic tags or protons, while that in the Mascot results is parent mass with isotopic tags. To convert the observed  $m/z$  into the unmodified mass  $M$ , multiply  $m/z$  and  $z$ , and then subtract 128.12 for each D0-TMAB, 131.14 for each D3-TMAB, or 137.17 for each D9-TMAB. Also subtract the number of protons; unlike most proteomic studies, the number of protons is not the same as the charge state because the TMAB labels impart one + charge per label. The number of protons is therefore  $z-T$  (where  $z$  is charge and  $T$  is number of TMAB labels). As described above, the TMAB labels are stable in MS mode, but usually decompose in MS/MS mode, losing the trimethylamine group from each of the tags corresponding to loss of 59 Da, 62 Da, or 68 Da from the D0-, D3- and D9-TMAB, respectively; this represents neutral loss of trimethylamine, with retention of the + charge on the tag remaining on the peptide. To generate a theoretical fragmentation pattern, Protein Prospector (or a comparable program) can be used. The N-terminus should contain the addition of C4 H4 O1 to reflect the mass of the TMAB group minus neutral loss of trimethylamine and also minus 1H so that the automatic addition of an H<sup>+</sup> by the program will lead to the correct final mass of +69 (note that this +69 is the same for D0-, D3- and D9-TMAB labels because the isotopic tag is lost upon MS/MS CID). Likewise, internal Lys should be replaced by the user-designated C10 H16 O2 N2 to reflect the mass of Lys with the TMAB group with the same modification as the N-term described above.

Accordingly, the supplemental data shown both the MS spectra and the Mascot search results for the peptides identified in HeLa cells synchronized or not in G1, S and G2/M phases. The MS and the MS/MS spectra for the 19 peptides were organized in the same order they were described in Table 1.

**Run 1:** Peptides isolated from asynchronous cells were labeled with D0-TMAB; peptides isolated from S phase were labeled with D3- TMAB; peptides isolated from the

G2/M were labeled with D9-TMAB and peptides isolated from the G1 were labeled with D12-TMAB.

**Run 2:** Reverse labeling: Peptides isolated from cells in G1 phase of cell cycle were labeled with D0-TMAB; peptides isolated from cells in G2/M phase of the cell cycle with D3-TMAB; peptides isolated from cells in the S phase of the cell cycle were labeled with D9-TMAB; and peptides isolated from asynchronous cells were labeled with D12-TMAB.

Peptide 1 – Run 1 444 (8.345) Sm (SG, 2x4.00)

1: TOF MS ES+  
147

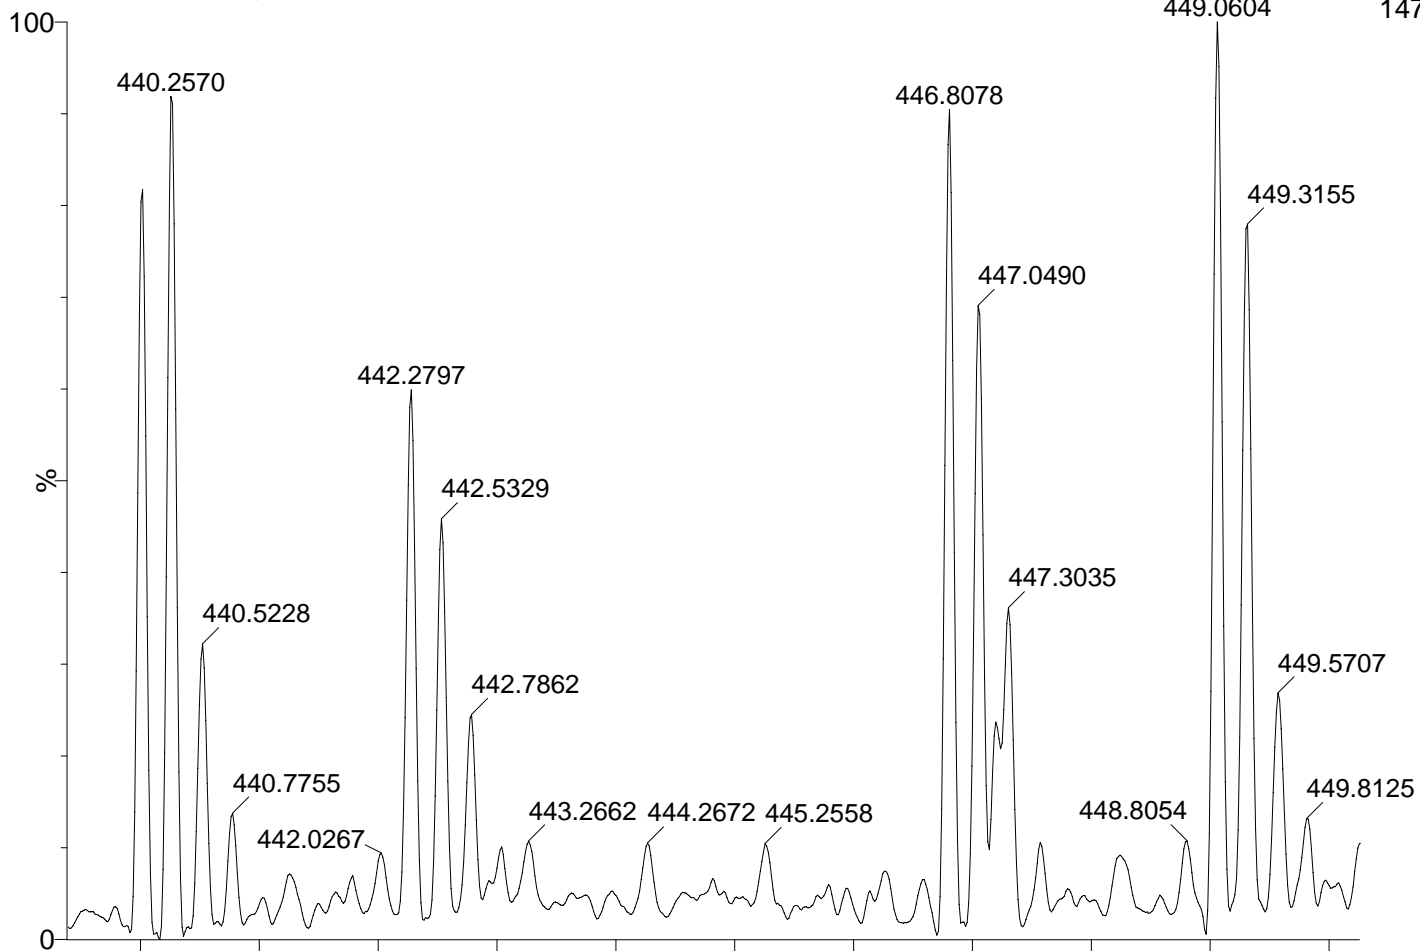

Peptide 1 – Run 2 437 (8.294) Sm (SG, 2x4.00)

1: TOF MS ES+  
320

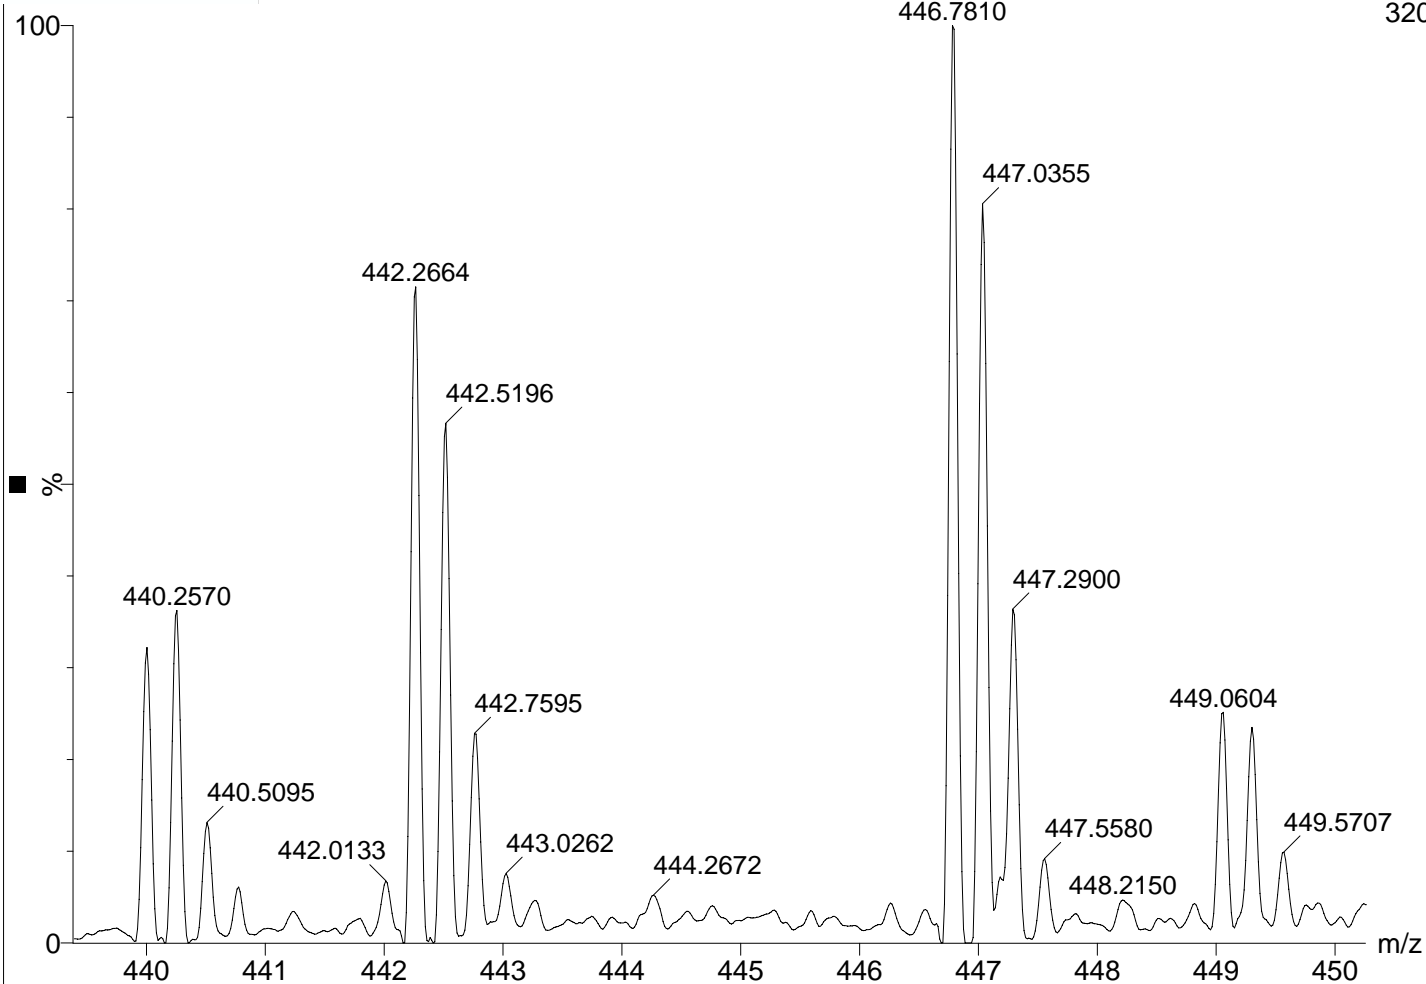

# Mascot Search Results

## Peptide View

### Peptide 1

MS/MS Fragmentation of **ADKVPKTAENFR**

Found in **PPIA\_HUMAN**, Peptidyl-prolyl cis-trans isomerase A OS=Homo sapiens GN=PPIA PE=1 SV=2

Match to Query 461: 1783.216976 from(446.811520,4+) intensity(4876.0000)

Title: 28: Sum of 2 scans in range 517 (rt=533.639, f=2, i=19) to 521 (rt=537.737, f=2, i=20) [C:\Users\synapt\Desktop\28062011 raw\290611 Leandro E1.raw]

Data file 290611 Chris E1.mgf

Click mouse within plot area to zoom in by factor of two about that point

Or,  to  Da  
 Label all possible matches  Label matches used for scoring

**Monoisotopic mass of neutral peptide Mr(calc):** 1783.1942

**Variable modifications:**

**N-term** : GIST-Quat:2H(9) (N-term), with neutral loss 68.1300

**K3** : GIST-Quat:2H(9) (K), with neutral loss 68.1300

**K6** : GIST-Quat:2H(9) (K), with neutral loss 68.1300

**Ions Score:** 17 **Expect:** 7.5e+002

**Matches** : 13/120 fragment ions using 34 most intense peaks ([help](#))

| # | b               | b <sup>++</sup> | b <sup>*</sup> | b <sup>***</sup> | b <sup>0</sup> | b <sup>0++</sup> | Seq. | y                | y <sup>++</sup> | y <sup>*</sup>  | y <sup>***</sup> | y <sup>0</sup>  | y <sup>0++</sup> | #  |
|---|-----------------|-----------------|----------------|------------------|----------------|------------------|------|------------------|-----------------|-----------------|------------------|-----------------|------------------|----|
| 1 | 140.0706        | 70.5389         |                |                  |                |                  | A    |                  |                 |                 |                  |                 |                  | 12 |
| 2 | <b>255.0975</b> | 128.0524        |                |                  | 237.0870       | 119.0471         | D    | 1440.7482        | 720.8777        | 1423.7216       | 712.3644         | 1422.7376       | 711.8724         | 11 |
| 3 | 451.2187        | 226.1130        | 434.1922       | 217.5997         | 433.2082       | 217.1077         | K    | <b>1325.7212</b> | 663.3642        | 1308.6947       | 654.8510         | 1307.7106       | 654.3590         | 10 |
| 4 | 550.2871        | 275.6472        | 533.2606       | 267.1339         | 532.2766       | 266.6419         | V    | 1129.6000        | <b>565.3037</b> | 1112.5735       | 556.7904         | 1111.5895       | 556.2984         | 9  |
| 5 | 647.3399        | 324.1736        | 630.3134       | 315.6603         | 629.3293       | <b>315.1683</b>  | P    | <b>1030.5316</b> | 515.7694        | 1013.5051       | 507.2562         | 1012.5211       | 506.7642         | 8  |
| 6 | <b>843.4611</b> | 422.2342        | 826.4345       | 413.7209         | 825.4505       | 413.2289         | K    | 933.4789         | 467.2431        | <b>916.4523</b> | 458.7298         | 915.4683        | 458.2378         | 7  |
| 7 | 944.5088        | 472.7580        | 927.4822       | 464.2447         | 926.4982       | 463.7527         | T    | 737.3577         | 369.1825        | 720.3311        | 360.6692         | 719.3471        | 360.1772         | 6  |
| 8 | 1015.5459       | 508.2766        | 998.5193       | 499.7633         | 997.5353       | 499.2713         | A    | <b>636.3100</b>  | 318.6586        | 619.2835        | 310.1454         | 618.2994        | 309.6534         | 5  |
| 9 | 1144.5885       | 572.7979        | 1127.5619      | 564.2846         | 1126.5779      | 563.7926         | E    | <b>565.2729</b>  | 283.1401        | 548.2463        | 274.6268         | <b>547.2623</b> | 274.1348         | 4  |

|    |                  |          |           |          |           |          |   |                 |          |          |          |  |  |   |
|----|------------------|----------|-----------|----------|-----------|----------|---|-----------------|----------|----------|----------|--|--|---|
| 10 | <b>1258.6314</b> | 629.8193 | 1241.6048 | 621.3061 | 1240.6208 | 620.8141 | N | <b>436.2303</b> | 218.6188 | 419.2037 | 210.1055 |  |  | 3 |
| 11 | 1405.6998        | 703.3535 | 1388.6733 | 694.8403 | 1387.6892 | 694.3483 | F | 322.1874        | 161.5973 | 305.1608 | 153.0840 |  |  | 2 |
| 12 |                  |          |           |          |           |          | R | <b>175.1190</b> | 88.0631  | 158.0924 | 79.5498  |  |  | 1 |

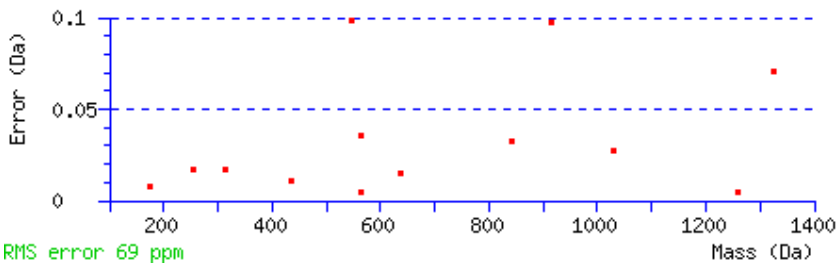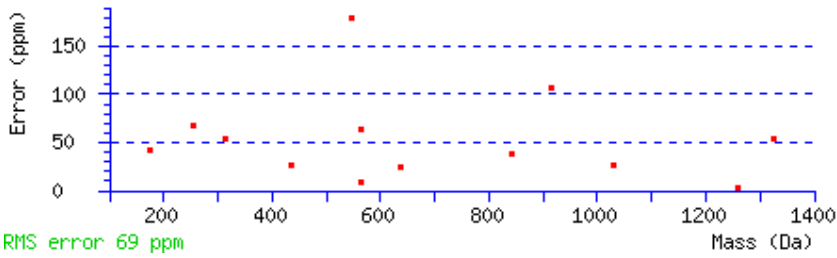

NCBI BLAST search of [ADKVPKTAENFR](#)

(Parameters: blastp, nr protein database, expect=20000, no filter, PAM30)

Other BLAST [web gateways](#)

**All matches to this query**

| Score | Mr(calc): | Delta  | Sequence                          |
|-------|-----------|--------|-----------------------------------|
| 17.1  | 1783.1942 | 0.0228 | <a href="#">ADKVPKTAENFR</a>      |
| 5.8   | 1783.0911 | 0.1259 | <a href="#">WEIPRESIKLVKR</a>     |
| 4.2   | 1783.0509 | 0.1661 | <a href="#">PGLTFHIKAAIQHP</a>    |
| 4.0   | 1783.1367 | 0.0803 | <a href="#">ILRGQTRHQVRKGV</a>    |
| 3.8   | 1783.0567 | 0.1603 | <a href="#">SVEAKIEDKKVQR</a>     |
| 3.7   | 1783.0641 | 0.1529 | <a href="#">IIIGASTAAKIMGVAGG</a> |
| 3.1   | 1783.0567 | 0.1603 | <a href="#">KLEENGIEVSKKR</a>     |
| 2.7   | 1783.1335 | 0.0835 | <a href="#">ILIDLTKQGLLFR</a>     |
| 2.4   | 1783.0945 | 0.1225 | <a href="#">GTFKVRVTRNPR</a>      |
| 2.3   | 1783.0567 | 0.1603 | <a href="#">QLLNVDLTKDSKR</a>     |

Mascot: <http://www.matrixscience.com/>

Peptide 2 – Run 1 500 (10.817) Sm (SG, 2x4.00)

1: TOF MS ES+  
258

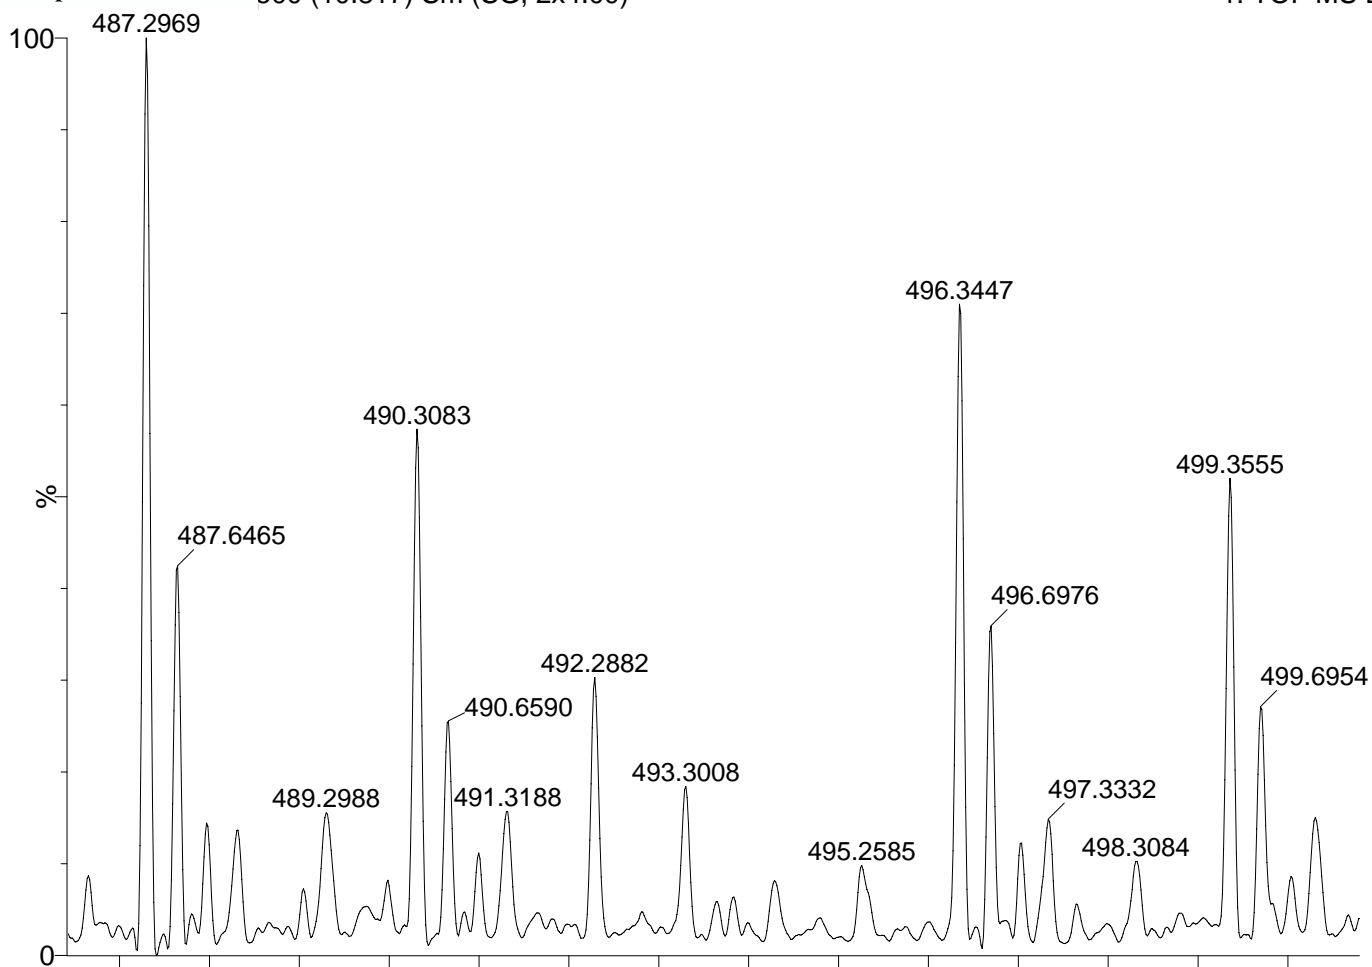

Peptide 2 – Run 2 496 (10.886) Sm (SG, 2x4.00)

1: TOF MS ES+  
239

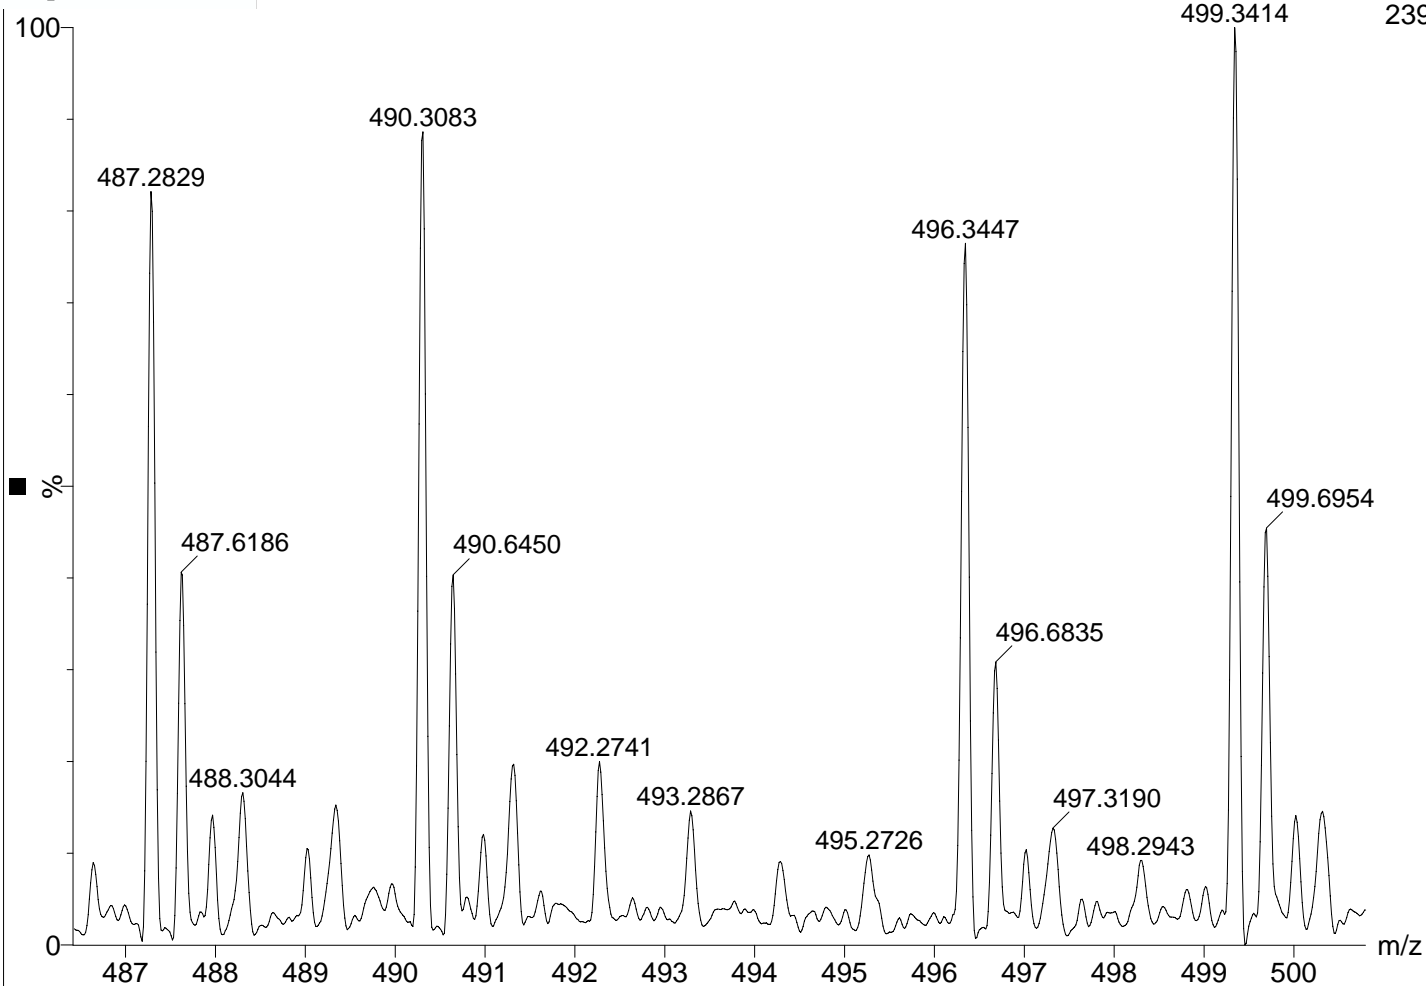

# Mascot Search Results

## Peptide View

### Peptide 2

MS/MS Fragmentation of **KADGIVSKNF**

Found in **RS21\_HUMAN**, 40S ribosomal protein S21 OS=Homo sapiens GN=RPS21 PE=1 SV=1

Match to Query 360: 1458.897732 from(487.306520,3+) intensity(6268.0000)

Title: 170: Sum of 2 scans in range 663 (rt=684.036, f=2, i=53) to 665 (rt=686.088, f=4, i=24) [C:\Users\synapt\Desktop\28062011 raw\290611 Leandro E1.raw]

Data file 290611 Chris E1.mgf

Click mouse within plot area to zoom in by factor of two about that point

Or,  to  Da  
 Label all possible matches      Label matches used for scoring

**Monoisotopic mass of neutral peptide Mr(calc):** 1458.8810

**Variable modifications:**

**N-term** : GIST-Quat (N-term), with neutral loss 59.0735

**K1** : GIST-Quat (K), with neutral loss 59.0735

**K8** : GIST-Quat (K), with neutral loss 59.0735

**Ions Score:** 12    **Expect:** 3.4e+003

**Matches** : 7/96 fragment ions using 22 most intense peaks    ([help](#))

| # | b               | b <sup>++</sup> | b <sup>*</sup> | b <sup>***</sup> | b <sup>0</sup> | b <sup>0++</sup> | Seq.     | y               | y <sup>++</sup> | y <sup>*</sup> | y <sup>***</sup> | y <sup>0</sup> | y <sup>0++</sup> | #         |
|---|-----------------|-----------------|----------------|------------------|----------------|------------------|----------|-----------------|-----------------|----------------|------------------|----------------|------------------|-----------|
| 1 | 265.1547        | 133.0810        | 248.1281       | 124.5677         |                |                  | <b>K</b> |                 |                 |                |                  |                |                  | <b>10</b> |
| 2 | <b>336.1918</b> | 168.5995        | 319.1652       | 160.0863         |                |                  | <b>A</b> | 1018.5204       | 509.7638        | 1001.4938      | 501.2506         | 1000.5098      | 500.7585         | <b>9</b>  |
| 3 | <b>451.2187</b> | 226.1130        | 434.1922       | 217.5997         | 433.2082       | 217.1077         | <b>D</b> | 947.4833        | 474.2453        | 930.4567       | 465.7320         | 929.4727       | 465.2400         | <b>8</b>  |
| 4 | <b>508.2402</b> | 254.6237        | 491.2136       | 246.1105         | 490.2296       | 245.6185         | <b>G</b> | <b>832.4563</b> | 416.7318        | 815.4298       | 408.2185         | 814.4458       | 407.7265         | <b>7</b>  |
| 5 | <b>621.3243</b> | 311.1658        | 604.2977       | 302.6525         | 603.3137       | 302.1605         | <b>I</b> | 775.4349        | 388.2211        | 758.4083       | 379.7078         | 757.4243       | 379.2158         | <b>6</b>  |
| 6 | 720.3927        | 360.7000        | 703.3661       | 352.1867         | 702.3821       | 351.6947         | <b>V</b> | <b>662.3508</b> | 331.6790        | 645.3243       | 323.1658         | 644.3402       | 322.6738         | <b>5</b>  |
| 7 | 807.4247        | 404.2160        | 790.3981       | 395.7027         | 789.4141       | 395.2107         | <b>S</b> | <b>563.2824</b> | 282.1448        | 546.2558       | 273.6316         | 545.2718       | 273.1395         | <b>4</b>  |
| 8 | 1003.5459       | 502.2766        | 986.5193       | 493.7633         | 985.5353       | 493.2713         | <b>K</b> | 476.2504        | 238.6288        | 459.2238       | 230.1155         |                |                  | <b>3</b>  |
| 9 | 1117.5888       | 559.2980        | 1100.5623      | 550.7848         | 1099.5782      | 550.2928         | <b>N</b> | 280.1292        | 140.5682        | 263.1026       | 132.0550         |                |                  | <b>2</b>  |



|    |  |  |  |  |  |  |  |   |          |         |  |  |  |  |   |
|----|--|--|--|--|--|--|--|---|----------|---------|--|--|--|--|---|
| 10 |  |  |  |  |  |  |  | F | 166.0863 | 83.5468 |  |  |  |  | 1 |
|----|--|--|--|--|--|--|--|---|----------|---------|--|--|--|--|---|

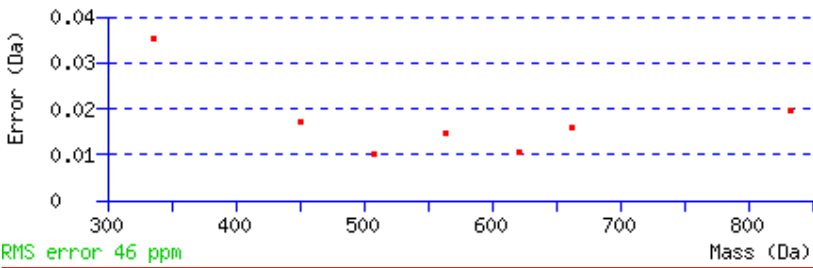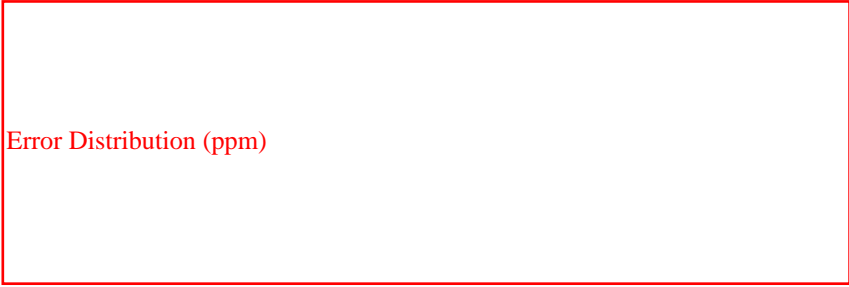

NCBI **BLAST** search of [KADGIVSKNF](#)  
 (Parameters: blastp, nr protein database, expect=20000, no filter, PAM30)  
 Other BLAST [web gateways](#)

**All matches to this query**

| Score | Mr(calc): | Delta   | Sequence                       |
|-------|-----------|---------|--------------------------------|
| 12.4  | 1458.8678 | 0.0299  | <a href="#">WTLPYKIGVVGP</a>   |
| 12.0  | 1458.8810 | 0.0167  | <a href="#">KADGIVSKNF</a>     |
| 10.9  | 1458.8025 | 0.0953  | <a href="#">FVLTLSCVGFFP</a>   |
| 9.9   | 1458.8176 | 0.0801  | <a href="#">DLMKEFPLLSM</a>    |
| 9.3   | 1458.7599 | 0.1378  | <a href="#">NNCHPTPGLSGIN</a>  |
| 9.2   | 1458.8392 | 0.0585  | <a href="#">PGLDGAKGEAGAPG</a> |
| 9.2   | 1458.8392 | 0.0585  | <a href="#">PGLDGAKGEAGAPG</a> |
| 6.3   | 1458.9901 | -0.0924 | <a href="#">GIPLNVLPKK</a>     |
| 5.9   | 1458.8433 | 0.0545  | <a href="#">LDKEFQLFQGV</a>    |
| 5.8   | 1458.7943 | 0.1034  | <a href="#">AQHILSSAHPGK</a>   |

Mascot: <http://www.matrixscience.com/>

Peptide 3 – Run 1 505 (11.005) Sm (SG, 2x4.00)

1: TOF MS ES+  
488

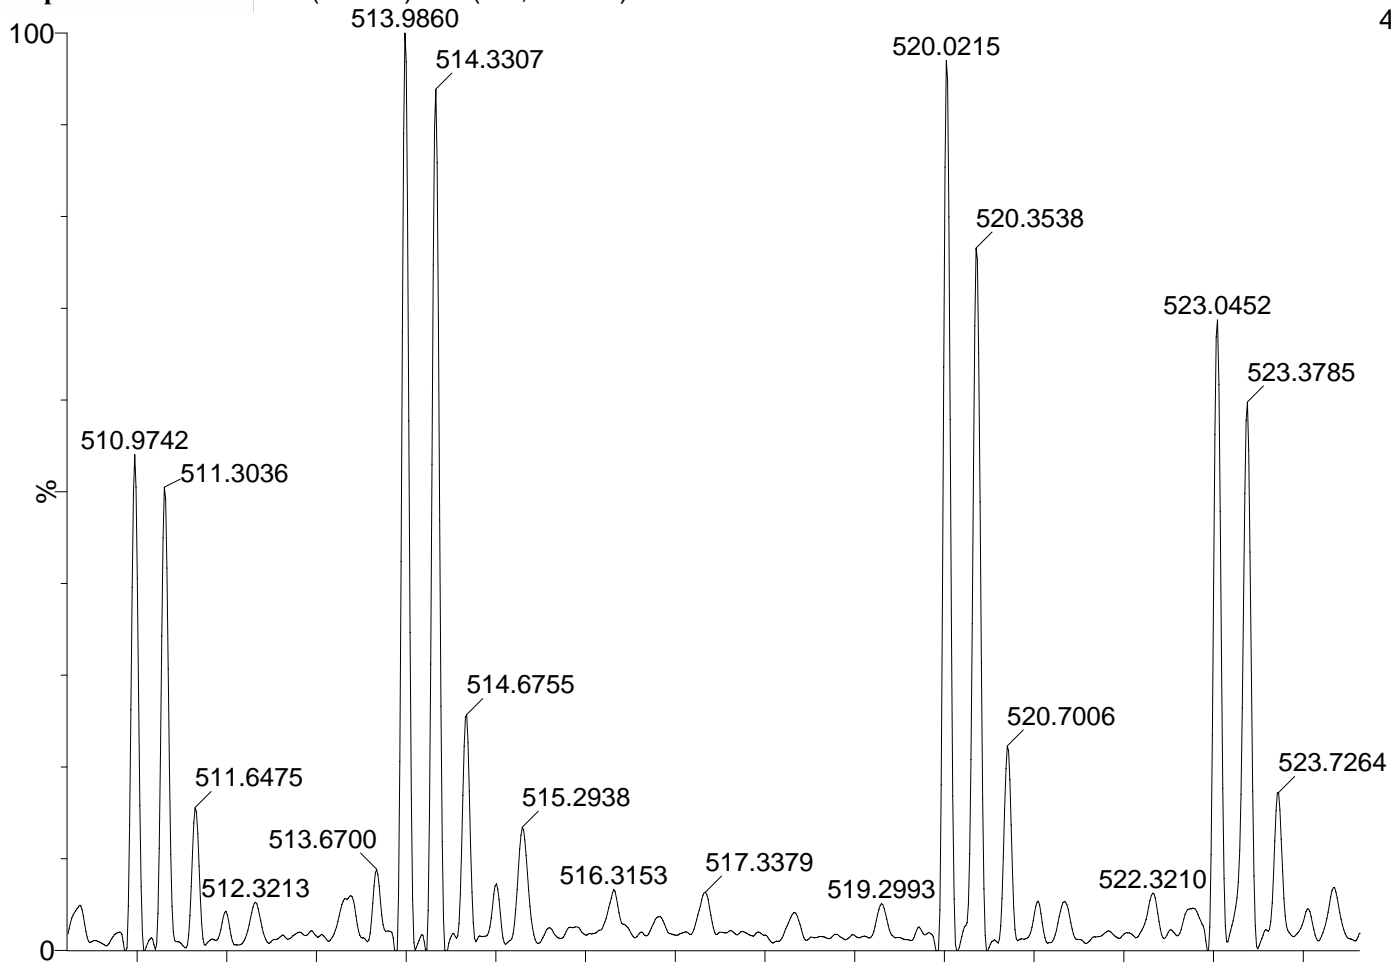

Peptide 3 – Run 2 501 (11.144) Sm (SG, 2x4.00)

1: TOF MS ES+  
634

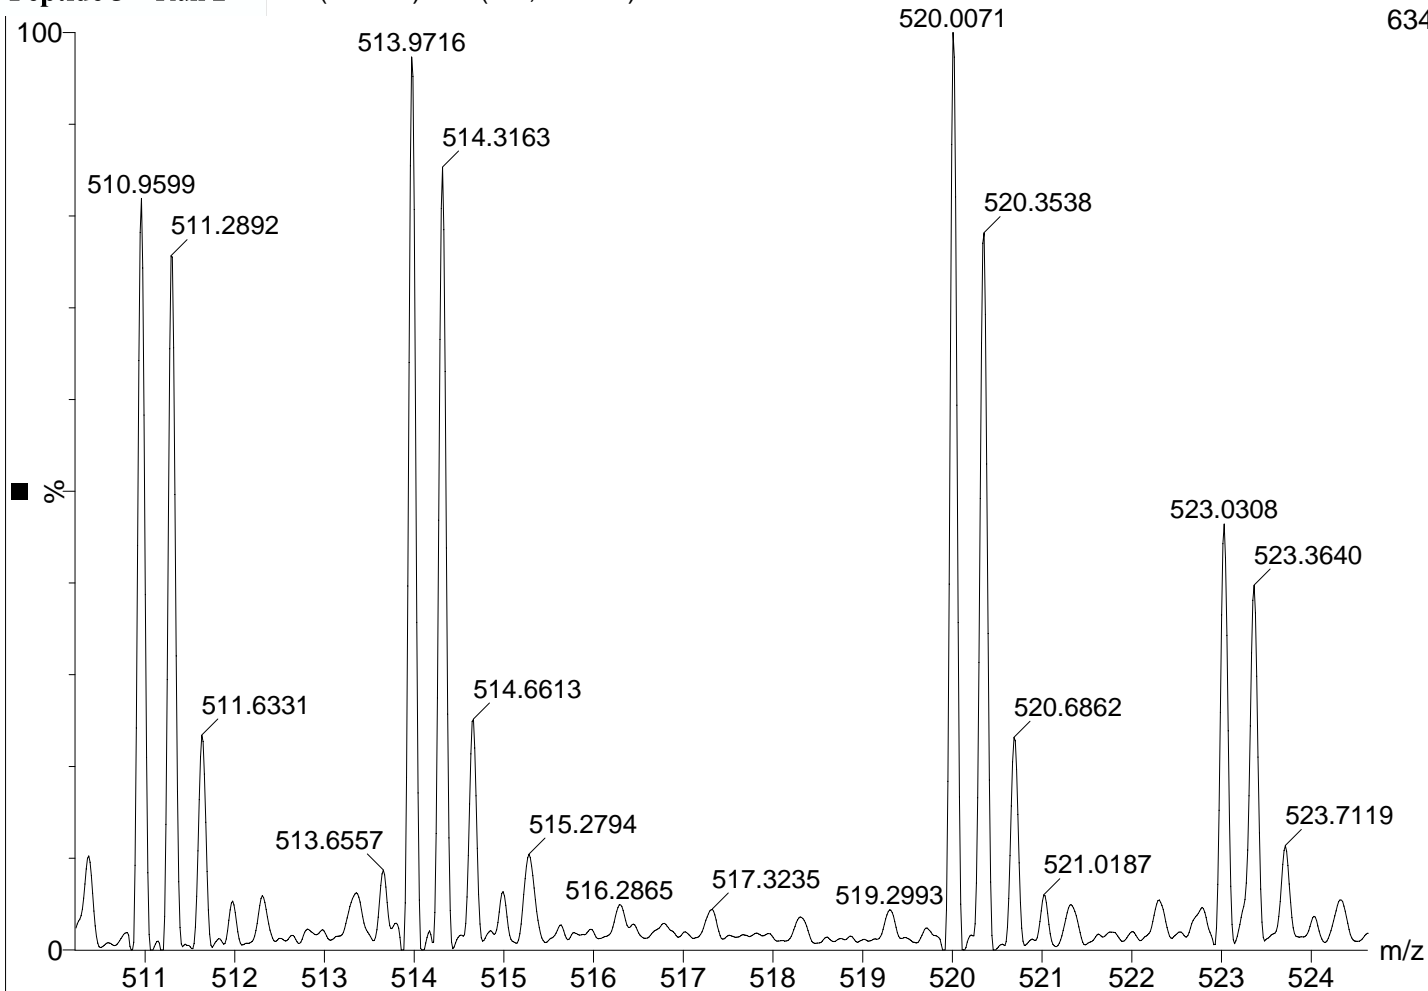

# Mascot Search Results

## Peptide View

### Peptide 3

MS/MS Fragmentation of **AKADGIVSKNF**

Found in **RS21\_HUMAN**, 40S ribosomal protein S21 OS=Homo sapiens GN=RPS21 PE=1 SV=1

Match to Query 415: 1557.075012 from(520.032280,3+) intensity(2453.0000)

Title: 194: Scan 691 (rt=712.887, f=4, i=29) [C:\Users\synapt\Desktop\28062011 raw\290611 Leandro E1.raw]

Data file 290611 Chris E1.mgf

Click mouse within plot area to zoom in by factor of two about that point

Or,  to  Da  
 Label all possible matches      Label matches used for scoring

**Monoisotopic mass of neutral peptide Mr(calc):** 1557.0876

**Variable modifications:**

**N-term** : GIST-Quat:2H(9) (N-term), with neutral loss 68.1300

**K2** : GIST-Quat:2H(9) (K), with neutral loss 68.1300

**K9** : GIST-Quat:2H(9) (K), with neutral loss 68.1300

**Ions Score:** 9    **Expect:** 4.7e+003

**Matches** : 5/104 fragment ions using 12 most intense peaks    ([help](#))

| #  | b               | b <sup>++</sup> | b <sup>*</sup> | b <sup>*++</sup> | b <sup>0</sup> | b <sup>0++</sup> | Seq. | y               | y <sup>++</sup> | y <sup>*</sup> | y <sup>*++</sup> | y <sup>0</sup> | y <sup>0++</sup> | #  |
|----|-----------------|-----------------|----------------|------------------|----------------|------------------|------|-----------------|-----------------|----------------|------------------|----------------|------------------|----|
| 1  | 140.0706        | 70.5389         |                |                  |                |                  | A    |                 |                 |                |                  |                |                  | 11 |
| 2  | 336.1918        | 168.5995        | 319.1652       | 160.0863         |                |                  | K    | 1214.6416       | 607.8244        | 1197.6150      | 599.3111         | 1196.6310      | 598.8191         | 10 |
| 3  | 407.2289        | 204.1181        | 390.2023       | 195.6048         |                |                  | A    | 1018.5204       | 509.7638        | 1001.4938      | 501.2506         | 1000.5098      | 500.7585         | 9  |
| 4  | 522.2558        | 261.6316        | 505.2293       | 253.1183         | 504.2453       | 252.6263         | D    | 947.4833        | 474.2453        | 930.4567       | 465.7320         | 929.4727       | 465.2400         | 8  |
| 5  | 579.2773        | <b>290.1423</b> | 562.2508       | 281.6290         | 561.2667       | 281.1370         | G    | <b>832.4563</b> | 416.7318        | 815.4298       | 408.2185         | 814.4458       | 407.7265         | 7  |
| 6  | <b>692.3614</b> | 346.6843        | 675.3348       | 338.1710         | 674.3508       | 337.6790         | I    | 775.4349        | 388.2211        | 758.4083       | 379.7078         | 757.4243       | 379.2158         | 6  |
| 7  | 791.4298        | 396.2185        | 774.4032       | 387.7053         | 773.4192       | 387.2132         | V    | <b>662.3508</b> | 331.6790        | 645.3243       | 323.1658         | 644.3402       | 322.6738         | 5  |
| 8  | 878.4618        | 439.7345        | 861.4353       | 431.2213         | 860.4512       | 430.7293         | S    | <b>563.2824</b> | 282.1448        | 546.2558       | 273.6316         | 545.2718       | 273.1395         | 4  |
| 9  | 1074.5830       | 537.7951        | 1057.5564      | 529.2819         | 1056.5724      | 528.7898         | K    | 476.2504        | 238.6288        | 459.2238       | 230.1155         |                |                  | 3  |
| 10 | 1188.6259       | 594.8166        | 1171.5994      | 586.3033         | 1170.6153      | 585.8113         | N    | 280.1292        | 140.5682        | 263.1026       | 132.0550         |                |                  | 2  |

|    |  |  |  |  |  |  |  |   |          |         |  |  |  |  |  |   |
|----|--|--|--|--|--|--|--|---|----------|---------|--|--|--|--|--|---|
| 11 |  |  |  |  |  |  |  | F | 166.0863 | 83.5468 |  |  |  |  |  | 1 |
|----|--|--|--|--|--|--|--|---|----------|---------|--|--|--|--|--|---|

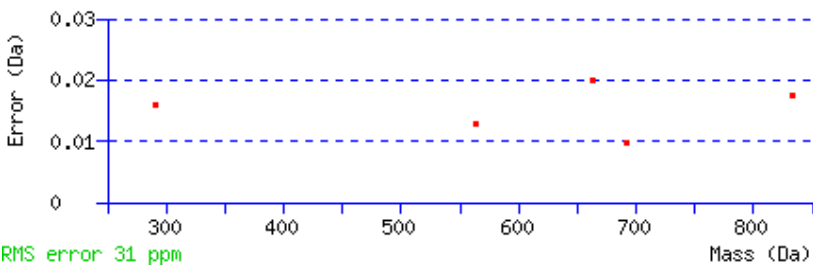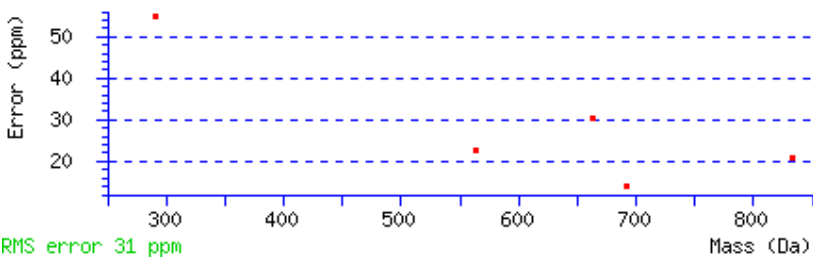

NCBI **BLAST** search of [AKADGIVSKNF](#)  
 (Parameters: blastp, nr protein database, expect=20000, no filter, PAM30)  
 Other BLAST [web gateways](#)

**All matches to this query**

| Score | Mr(calc): | Delta   | Sequence                     |
|-------|-----------|---------|------------------------------|
| 8.9   | 1557.0876 | -0.0126 | <a href="#">AKADGIVSKNF</a>  |
| 7.5   | 1557.2331 | -0.1581 | <a href="#">KGLKVLPKGIP</a>  |
| 7.5   | 1556.9522 | 0.1228  | <a href="#">LGLVKLPLHQFY</a> |
| 6.9   | 1556.9079 | 0.1672  | <a href="#">IGNKNPALWKY</a>  |
| 6.7   | 1557.0268 | 0.0482  | <a href="#">HEGRKGAIAKKP</a> |
| 6.7   | 1557.0268 | 0.0482  | <a href="#">HEGRKGAIAKKP</a> |
| 6.7   | 1557.0268 | 0.0482  | <a href="#">HEGRKGALAKKP</a> |
| 6.7   | 1557.0268 | 0.0482  | <a href="#">HEGRKGALAKKP</a> |
| 5.8   | 1556.9613 | 0.1137  | <a href="#">KKRAKLSGSTLD</a> |
| 4.8   | 1556.9488 | 0.1262  | <a href="#">GDLQPLPIQKGE</a> |

**Mascot:** <http://www.matrixscience.com/>

Peptide 4 – Run 1 489 (9.736) Sm (SG, 2x4.00)

1: TOF MS ES+ 65.7

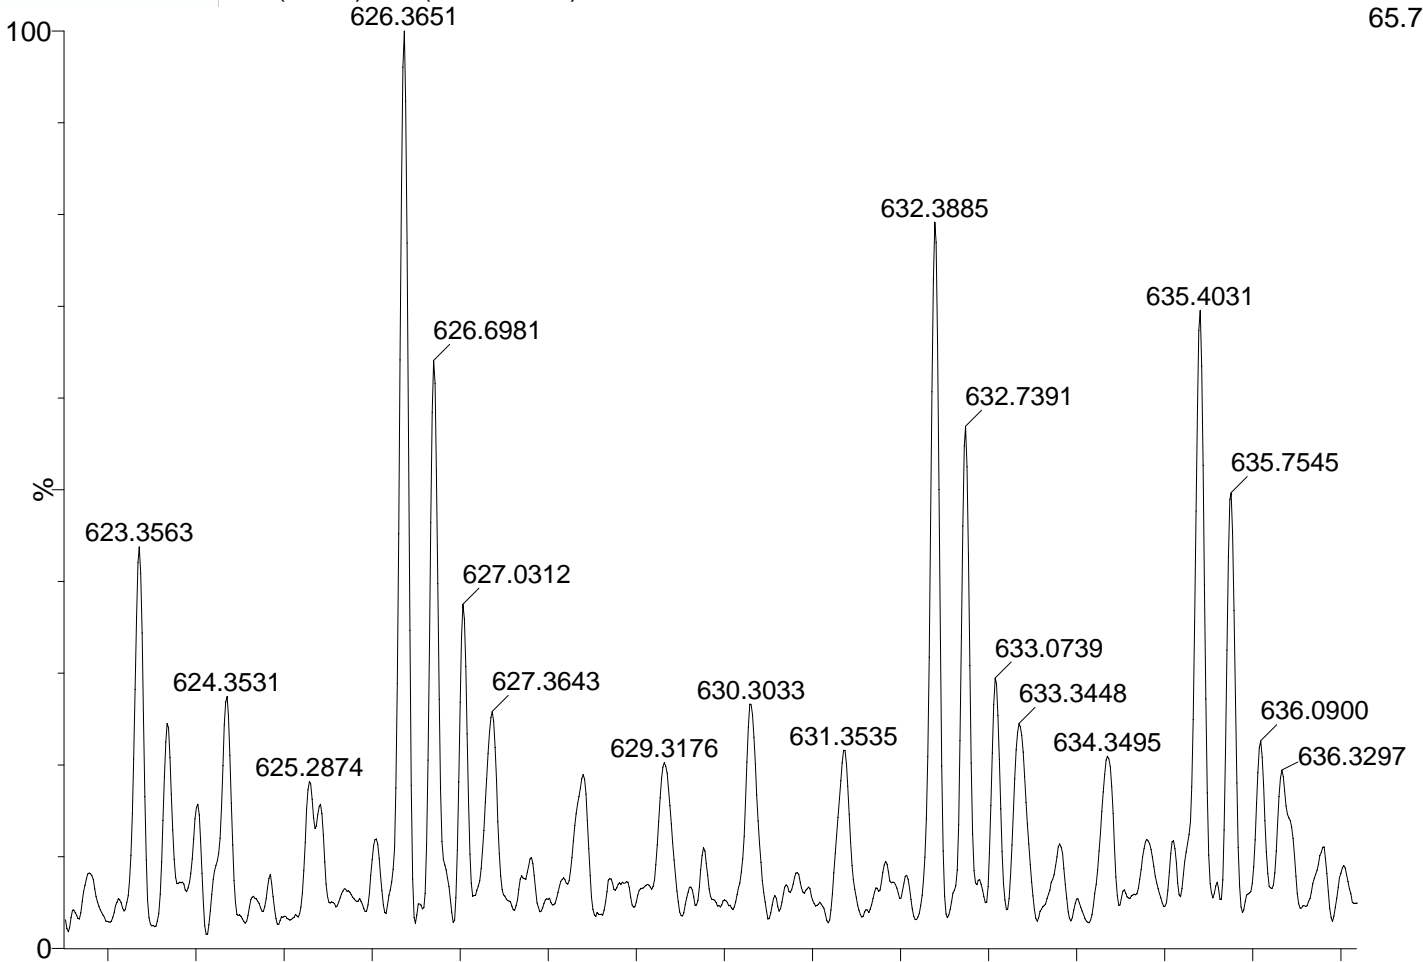

Peptide 4 – Run 2 (10.749) Sm (SG, 2x4.00)

1: TOF MS ES+ 25.5

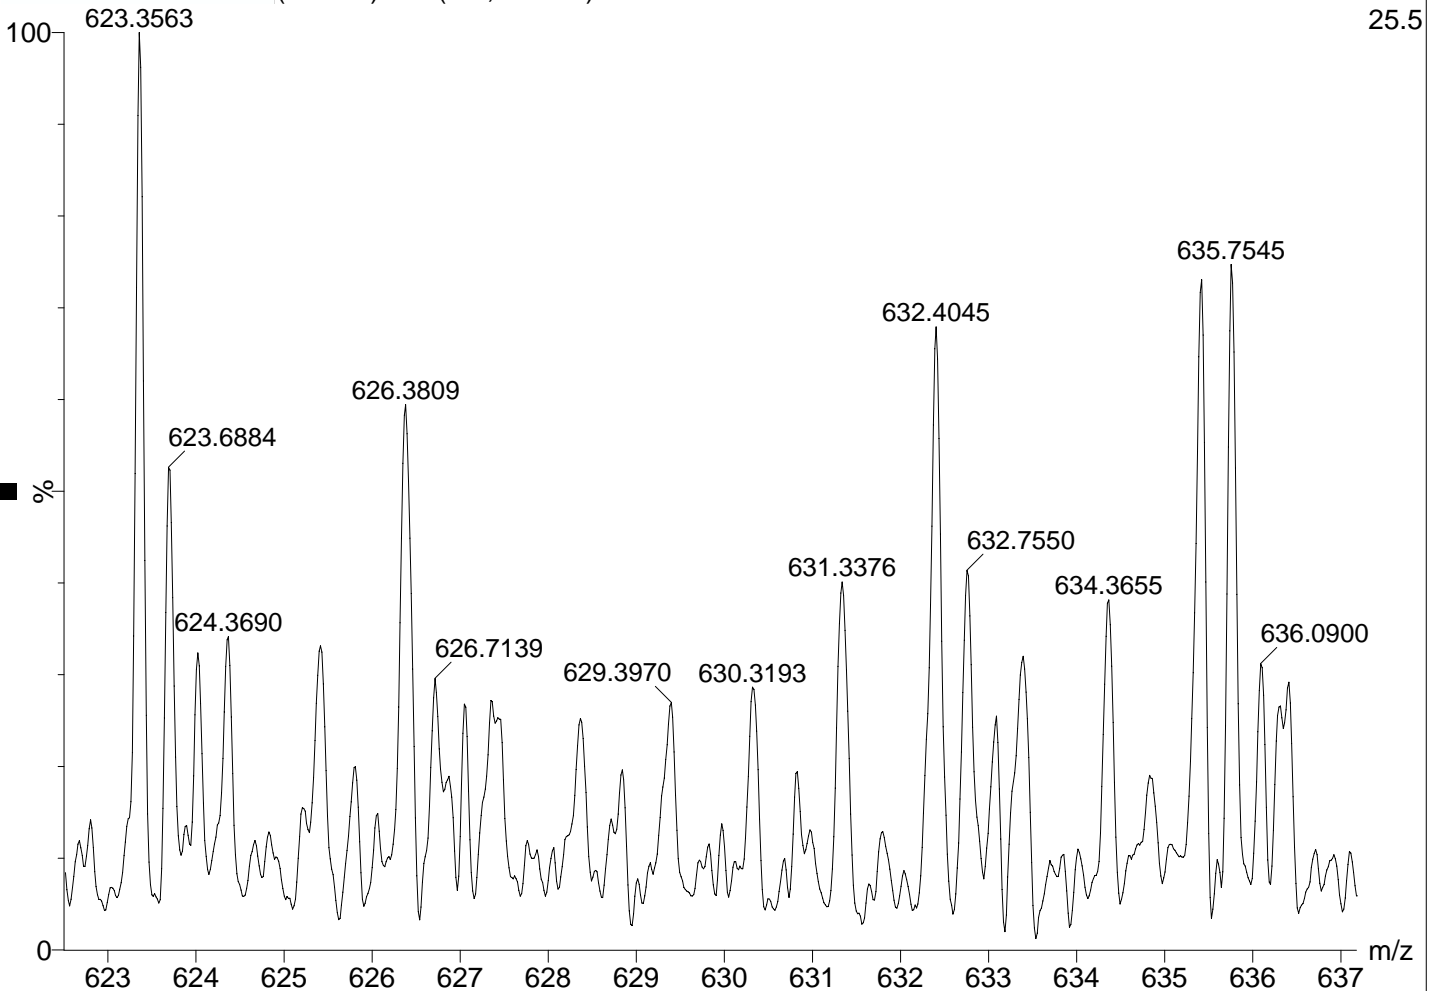

# Mascot Search Results

## Peptide View

### Peptide 4

MS/MS Fragmentation of **GSGSKGKGGEIQVSV**

Found in **CH10\_HUMAN**, 10 kDa heat shock protein, mitochondrial OS=Homo sapiens GN=HSPE1 PE=1 SV=2

Match to Query 489: 1894.253022 from(632.424950,3+) intensity(2786.0000)

Title: 56: Sum of 2 scans in range 568 (rt=586.216, f=3, i=17) to 569 (rt=587.237, f=4, i=10) [C:\Users\synapt\Desktop\28062011 raw\290611 Leandro E1.raw]

Data file 290611 Chris E1.mgf

Click mouse within plot area to zoom in by factor of two about that point

Or,  to  Da  
 Label all possible matches  Label matches used for scoring

**Monoisotopic mass of neutral peptide Mr(calc):** 1894.2473

**Variable modifications:**

**N-term** : GIST-Quat:2H(9) (N-term), with neutral loss 68.1300

**K5** : GIST-Quat:2H(9) (K), with neutral loss 68.1300

**K7** : GIST-Quat:2H(9) (K), with neutral loss 68.1300

**Ions Score:** 16 **Expect:** 1.2e+003

**Matches** : 6/160 fragment ions using 14 most intense peaks ([help](#))

| # | b        | b <sup>++</sup> | b <sup>*</sup> | b <sup>*++</sup> | b <sup>0</sup> | b <sup>0++</sup> | Seq. | y         | y <sup>++</sup> | y <sup>*</sup> | y <sup>*++</sup> | y <sup>0</sup> | y <sup>0++</sup> | #  |
|---|----------|-----------------|----------------|------------------|----------------|------------------|------|-----------|-----------------|----------------|------------------|----------------|------------------|----|
| 1 | 126.0550 | 63.5311         |                |                  |                |                  | G    |           |                 |                |                  |                |                  | 16 |
| 2 | 213.0870 | 107.0471        |                |                  | 195.0764       | 98.0418          | S    | 1565.8170 | 783.4121        | 1548.7904      | 774.8988         | 1547.8064      | 774.4068         | 15 |
| 3 | 270.1084 | 135.5579        |                |                  | 252.0979       | 126.5526         | G    | 1478.7849 | 739.8961        | 1461.7584      | 731.3828         | 1460.7744      | 730.8908         | 14 |
| 4 | 357.1405 | 179.0739        |                |                  | 339.1299       | 170.0686         | S    | 1421.7635 | 711.3854        | 1404.7369      | 702.8721         | 1403.7529      | 702.3801         | 13 |
| 5 | 553.2617 | 277.1345        | 536.2351       | 268.6212         | 535.2511       | 268.1292         | K    | 1334.7314 | 667.8694        | 1317.7049      | 659.3561         | 1316.7209      | 658.8641         | 12 |
| 6 | 610.2831 | 305.6452        | 593.2566       | 297.1319         | 592.2726       | 296.6399         | G    | 1138.6103 | 569.8088        | 1121.5837      | 561.2955         | 1120.5997      | 560.8035         | 11 |
| 7 | 806.4043 | 403.7058        | 789.3777       | 395.1925         | 788.3937       | 394.7005         | K    | 1081.5888 | 541.2980        | 1064.5623      | 532.7848         | 1063.5782      | 532.2928         | 10 |
| 8 | 863.4258 | 432.2165        | 846.3992       | 423.7032         | 845.4152       | 423.2112         | G    | 885.4676  | 443.2375        | 868.4411       | 434.7242         | 867.4571       | 434.2322         | 9  |
| 9 | 920.4472 | 460.7272        | 903.4207       | 452.2140         | 902.4367       | 451.7220         | G    | 828.4462  | 414.7267        | 811.4196       | 406.2134         | 810.4356       | 405.7214         | 8  |

|    |                  |          |           |          |           |          |          |                 |          |          |          |          |          |          |
|----|------------------|----------|-----------|----------|-----------|----------|----------|-----------------|----------|----------|----------|----------|----------|----------|
| 10 | <b>1049.4898</b> | 525.2485 | 1032.4633 | 516.7353 | 1031.4793 | 516.2433 | <b>E</b> | 771.4247        | 386.2160 | 754.3981 | 377.7027 | 753.4141 | 377.2107 | <b>7</b> |
| 11 | <b>1162.5739</b> | 581.7906 | 1145.5473 | 573.2773 | 1144.5633 | 572.7853 | <b>I</b> | 642.3821        | 321.6947 | 625.3556 | 313.1814 | 624.3715 | 312.6894 | <b>6</b> |
| 12 | <b>1290.6325</b> | 645.8199 | 1273.6059 | 637.3066 | 1272.6219 | 636.8146 | <b>Q</b> | 529.2980        | 265.1527 | 512.2715 | 256.6394 | 511.2875 | 256.1474 | <b>5</b> |
| 13 | 1387.6852        | 694.3462 | 1370.6587 | 685.8330 | 1369.6747 | 685.3410 | <b>P</b> | <b>401.2395</b> | 201.1234 |          |          | 383.2289 | 192.1181 | <b>4</b> |
| 14 | <b>1486.7536</b> | 743.8805 | 1469.7271 | 735.3672 | 1468.7431 | 734.8752 | <b>V</b> | 304.1867        | 152.5970 |          |          | 286.1761 | 143.5917 | <b>3</b> |
| 15 | 1573.7857        | 787.3965 | 1556.7591 | 778.8832 | 1555.7751 | 778.3912 | <b>S</b> | <b>205.1183</b> | 103.0628 |          |          | 187.1077 | 94.0575  | <b>2</b> |
| 16 |                  |          |           |          |           |          | <b>V</b> | 118.0863        | 59.5468  |          |          |          |          | <b>1</b> |

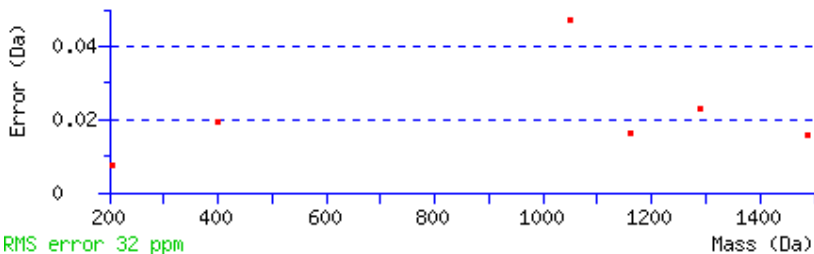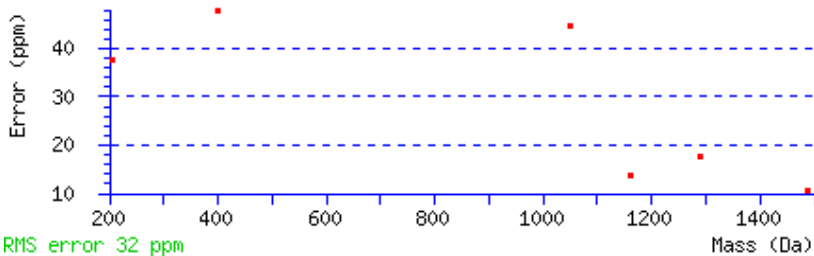

NCBI **BLAST** search of [GSGSKGKGGEIQVSV](#)

(Parameters: blastp, nr protein database, expect=20000, no filter, PAM30)

Other BLAST [web gateways](#)

**All matches to this query**

| Score | Mr(calc): | Delta   | Sequence                        |
|-------|-----------|---------|---------------------------------|
| 22.2  | 1894.2462 | 0.0069  | <a href="#">GKSKKFTLKRLMAD</a>  |
| 20.1  | 1894.1503 | 0.1028  | <a href="#">RGKKLPNNPAFGFVS</a> |
| 20.1  | 1894.1503 | 0.1028  | <a href="#">RGKKLPNNPAFGFVS</a> |
| 20.1  | 1894.0927 | 0.1603  | <a href="#">YKKYALQSAAGKDA</a>  |
| 15.9  | 1894.1006 | 0.1525  | <a href="#">ESKKVSASTLKRDA</a>  |
| 15.9  | 1894.2473 | 0.0057  | <a href="#">GSGSKGKGGEIQVSV</a> |
| 15.9  | 1894.3717 | -0.1187 | <a href="#">RLTGFKIPLKKDA</a>   |
| 15.9  | 1894.2989 | -0.0459 | <a href="#">TPEERTKALKKW</a>    |
| 14.2  | 1894.1000 | 0.1531  | <a href="#">DSKSKKHELKITQQG</a> |
| 14.2  | 1894.1000 | 0.1531  | <a href="#">DSKSKKHELKITQQG</a> |

Mascot: <http://www.matrixscience.com/>

Peptide 5 - Run 1 508 (10.524) Sm (SG, 2x4.00)

1: TOF MS ES+  
56.6

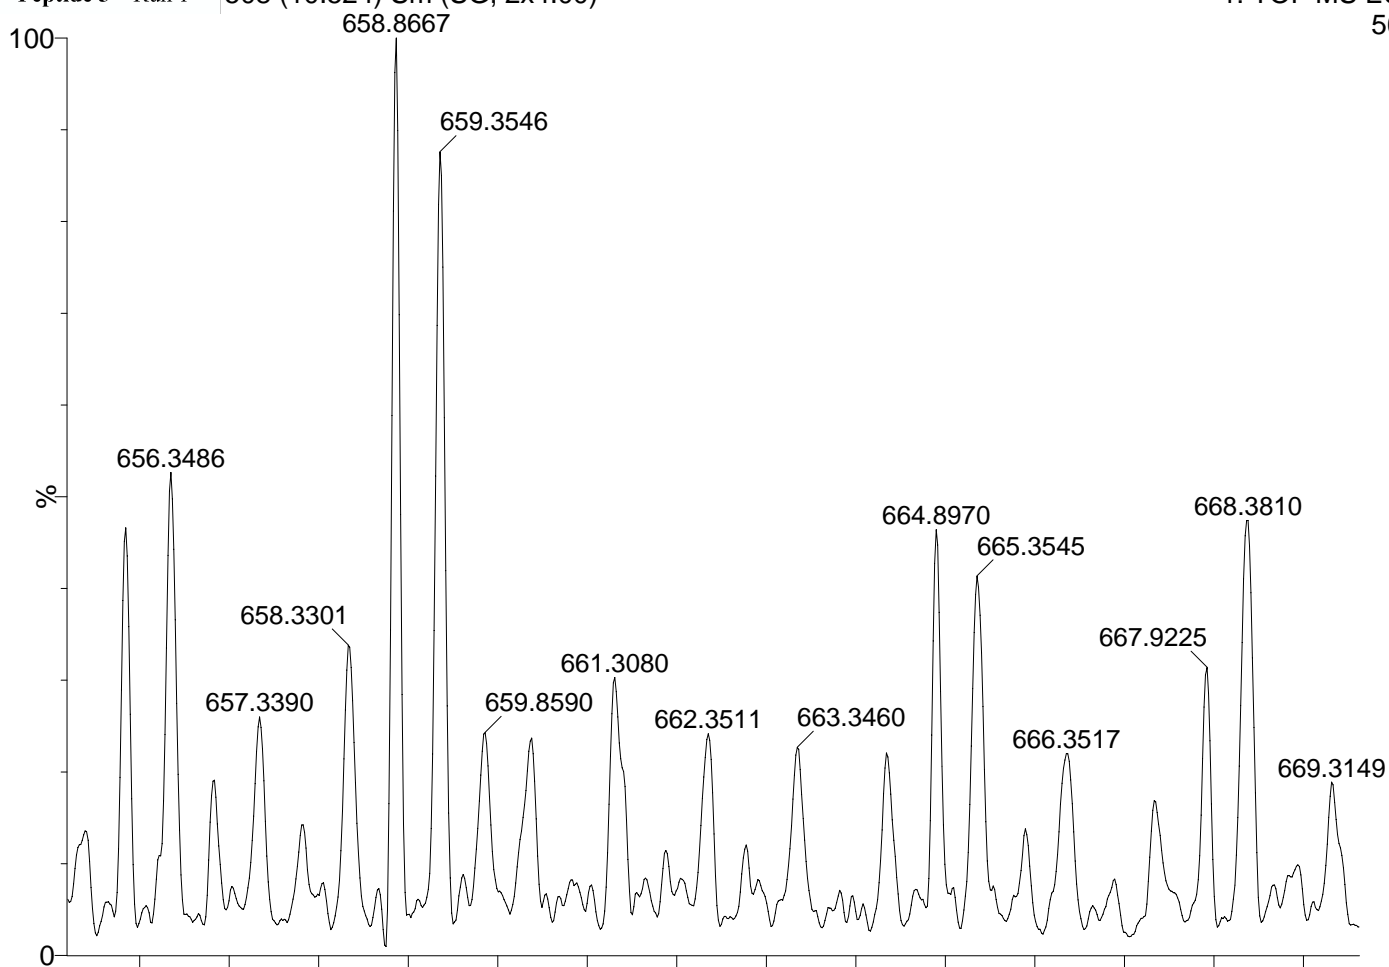

Peptide 5 - Run 2 609 (11.452) Sm (SG, 2x4.00)

1: TOF MS ES+  
26.0

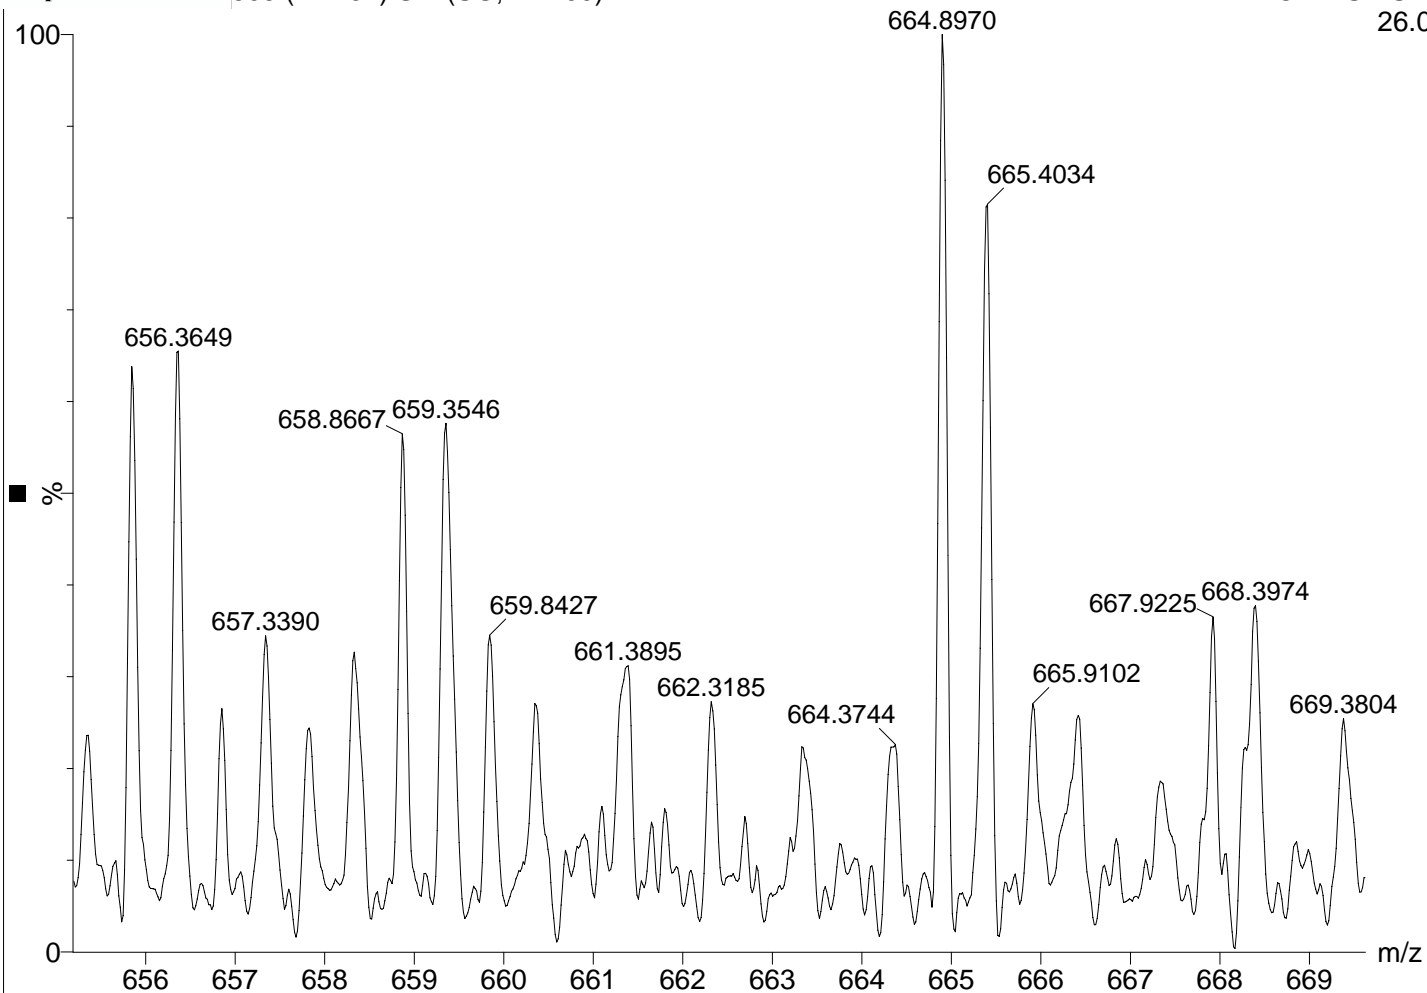



# Mascot Search Results

## Peptide View

### Peptide 5

MS/MS Fragmentation of **WELVVLGKL**

Found in **CCND2\_HUMAN**, G1/S-specific cyclin-D2 OS=Homo sapiens GN=CCND2 PE=1 SV=1

Match to Query 299: 1327.812108 from(664.913330,2+) intensity(1067.0000)

Title: 110: Scan 616 (rt=635.716, f=4, i=16) [C:\Users\synapt\Desktop\28062011 raw\290611 Leandro E1.raw]

Data file 290611 Chris E1.mgf

Click mouse within plot area to zoom in by factor of two about that point

Or,  to  Da

Label all possible matches  Label matches used for scoring

**Monoisotopic mass of neutral peptide Mr(calc):** 1327.9503

**Variable modifications:**

**N-term** : GIST-Quat:2H(9) (N-term), with neutral loss 68.1300

**K8** : GIST-Quat:2H(9) (K), with neutral loss 68.1300

**Ions Score:** 7 **Expect:** 2

**Matches** : 5/64 fragment ions using 13 most intense peaks ([help](#))

| # | b               | b <sup>++</sup> | b <sup>*</sup> | b <sup>***</sup> | b <sup>0</sup> | b <sup>0++</sup> | Seq.     | y               | y <sup>++</sup> | y <sup>*</sup>  | y <sup>***</sup> | y <sup>0</sup> | y <sup>0++</sup> | #        |
|---|-----------------|-----------------|----------------|------------------|----------------|------------------|----------|-----------------|-----------------|-----------------|------------------|----------------|------------------|----------|
| 1 | <b>255.1128</b> | 128.0600        |                |                  |                |                  | <b>W</b> |                 |                 |                 |                  |                |                  | <b>9</b> |
| 2 | 384.1554        | 192.5813        |                |                  | 366.1448       | 183.5761         | <b>E</b> | <b>938.5921</b> | 469.7997        | 921.5655        | 461.2864         | 920.5815       | 460.7944         | <b>8</b> |
| 3 | 497.2395        | 249.1234        |                |                  | 479.2289       | 240.1181         | <b>L</b> | <b>809.5495</b> | 405.2784        | 792.5230        | 396.7651         |                |                  | <b>7</b> |
| 4 | 596.3079        | 298.6576        |                |                  | 578.2973       | 289.6523         | <b>V</b> | 696.4654        | 348.7364        | <b>679.4389</b> | 340.2231         |                |                  | <b>6</b> |
| 5 | 695.3763        | 348.1918        |                |                  | 677.3657       | 339.1865         | <b>V</b> | <b>597.3970</b> | 299.2022        | 580.3705        | 290.6889         |                |                  | <b>5</b> |
| 6 | 808.4604        | 404.7338        |                |                  | 790.4498       | 395.7285         | <b>L</b> | 498.3286        | 249.6679        | 481.3021        | 241.1547         |                |                  | <b>4</b> |
| 7 | 865.4818        | 433.2445        |                |                  | 847.4713       | 424.2393         | <b>G</b> | 385.2445        | 193.1259        | 368.2180        | 184.6126         |                |                  | <b>3</b> |
| 8 | 1061.6030       | 531.3051        | 1044.5764      | 522.7919         | 1043.5924      | 522.2999         | <b>K</b> | 328.2231        | 164.6152        | 311.1965        | 156.1019         |                |                  | <b>2</b> |
| 9 |                 |                 |                |                  |                |                  | <b>L</b> | 132.1019        | 66.5546         |                 |                  |                |                  | <b>1</b> |

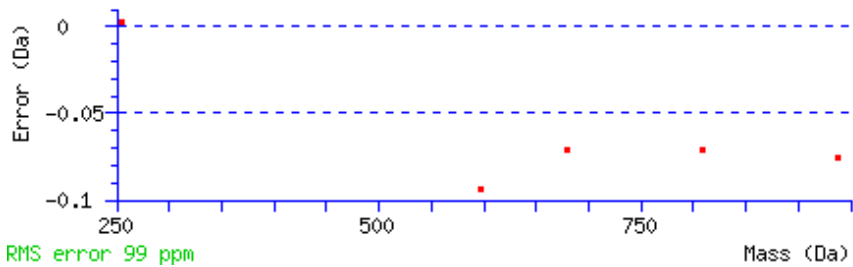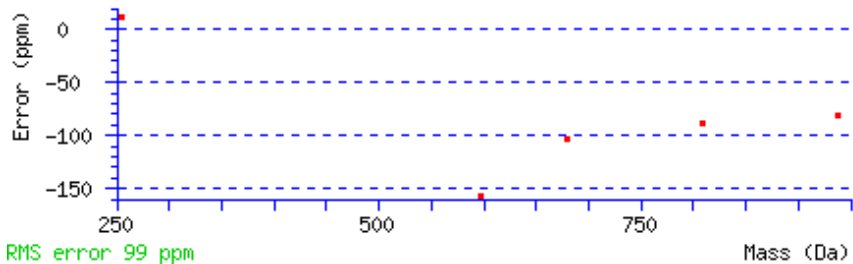

NCBI **BLAST** search of [WELVVLGKL](#)

(Parameters: blastp, nr protein database, expect=20000, no filter, PAM30)

Other BLAST [web gateways](#)

**All matches to this query**

| Score | Mr(calc): | Delta   | Sequence                     |
|-------|-----------|---------|------------------------------|
| 11.5  | 1327.6983 | 0.1138  | <a href="#">ADRDAIVEALE</a>  |
| 9.8   | 1327.7525 | 0.0596  | <a href="#">WTEQKENQ</a>     |
| 9.8   | 1327.7525 | 0.0596  | <a href="#">WTEQKENQ</a>     |
| 8.9   | 1327.8266 | -0.0145 | <a href="#">VGKGLAAVLENK</a> |
| 7.5   | 1327.9503 | -0.1382 | <a href="#">WELVVLGKL</a>    |
| 7.0   | 1327.6442 | 0.1679  | <a href="#">EHKDSVMAVLEA</a> |
| 7.0   | 1327.6792 | 0.1329  | <a href="#">GPGDGIVMAFDN</a> |
| 6.4   | 1327.7004 | 0.1117  | <a href="#">DATQLVCTDLN</a>  |
| 6.4   | 1327.8518 | -0.0397 | <a href="#">ELLLQVLSVGK</a>  |
| 6.3   | 1327.8847 | -0.0726 | <a href="#">EGLQPQKR</a>     |

Mascot: <http://www.matrixscience.com/>

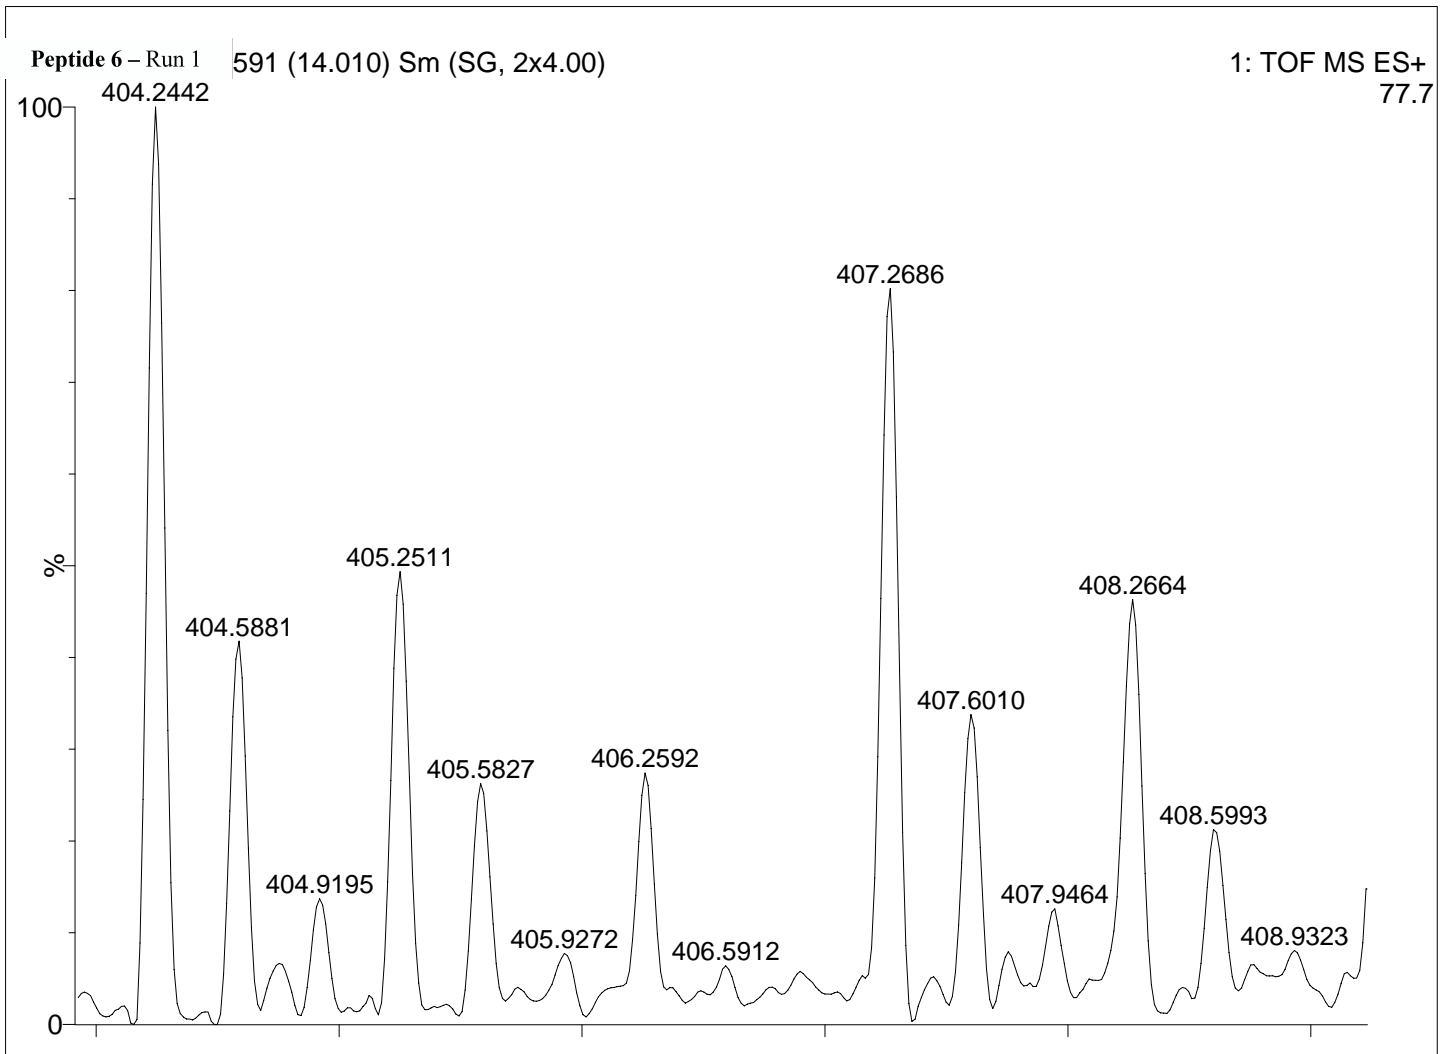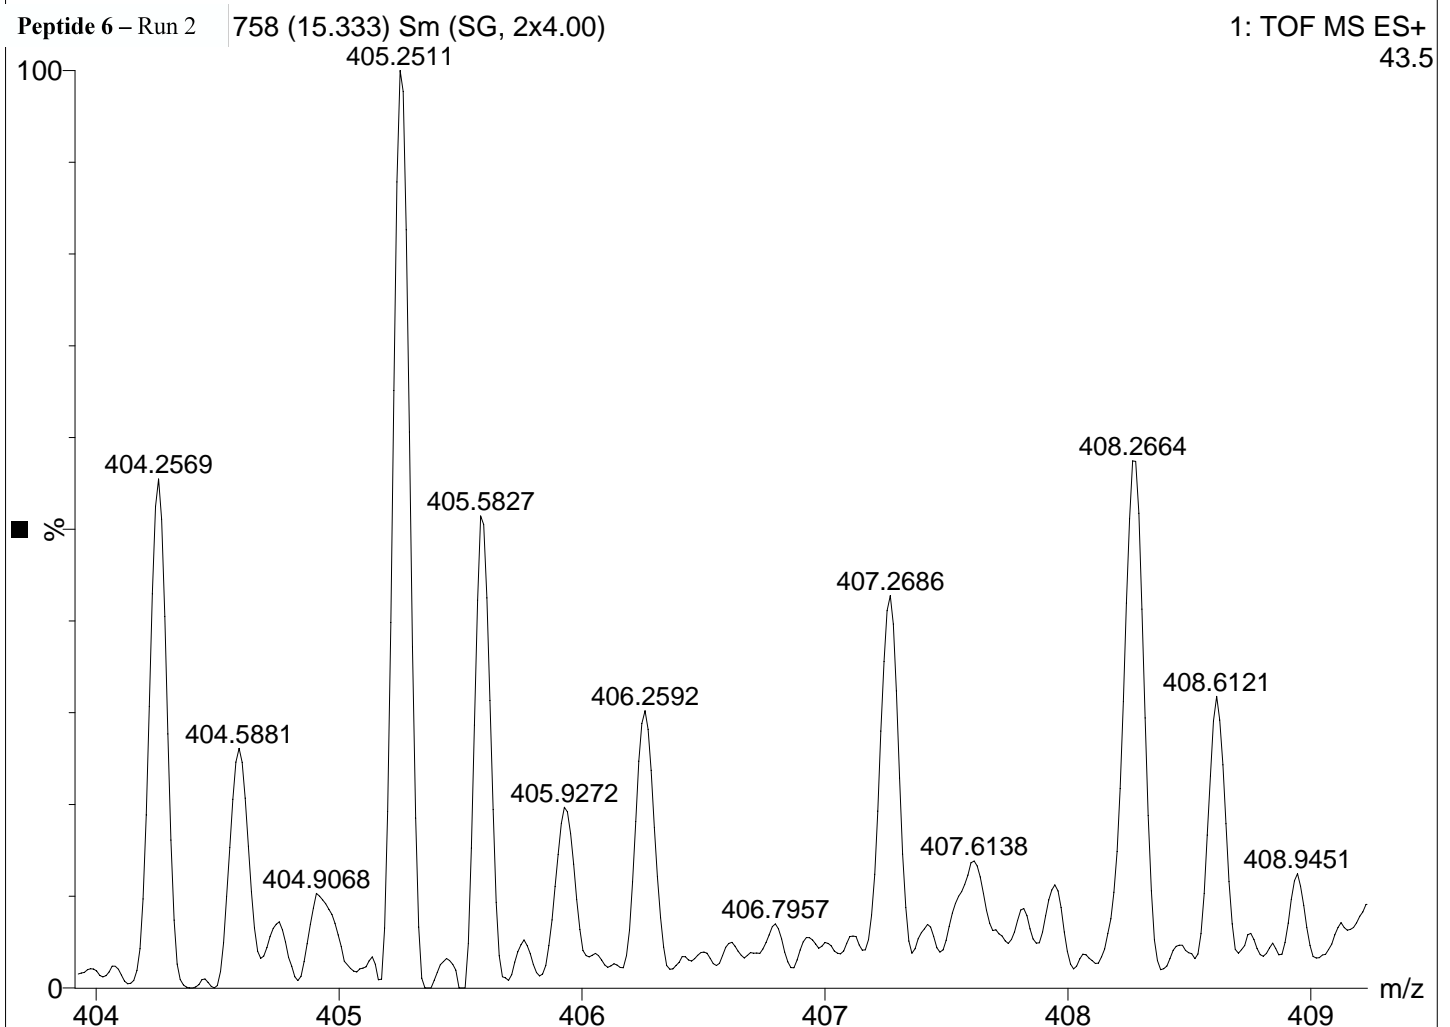

# Mascot Search Results

## Peptide View

### Peptide 6

MS/MS Fragmentation of **QITSPIPAIGS**

Found in **TOX3\_HUMAN**, TOX high mobility group box family member 3 OS=Homo sapiens GN=TOX3 PE=2 SV=2

Match to Query 238: 1209.781272 from(404.267700,3+) intensity(1687.0000)

Title: 312: Scan 808 (rt=833.413, f=2, i=87) [C:\Users\synapt\Desktop\28062011 raw\290611 Leandro E1.raw]

Data file 290611 Chris E1.mgf

Click mouse within plot area to zoom in by factor of two about that point

Or, Plot from  to  Da

Label all possible matches  Label matches used for scoring

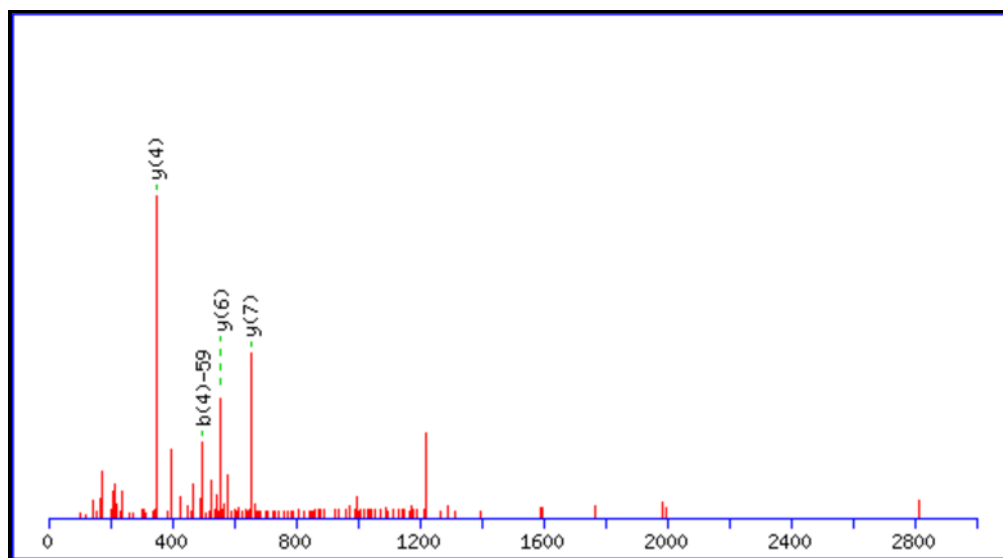

Monoisotopic mass of neutral peptide  $M_r(\text{calc})$ : 1209.6969

Variable modifications:

N-term : GIST-Quat (N-term), with neutral loss 59.0735

Ions Score: 10 Expect: 1.8

Matches : 4/96 fragment ions using 11 most intense peaks ([help](#))

| #  | b               | b <sup>++</sup> | b*        | b <sup>*++</sup> | b <sup>0</sup> | b <sup>0++</sup> | Seq. | y               | y <sup>++</sup> | y <sup>0</sup> | y <sup>0++</sup> | #  |
|----|-----------------|-----------------|-----------|------------------|----------------|------------------|------|-----------------|-----------------|----------------|------------------|----|
| 1  | 197.0921        | 99.0497         | 180.0655  | 90.5364          |                |                  | Q    |                 |                 |                |                  | 11 |
| 2  | 310.1761        | 155.5917        | 293.1496  | 147.0784         |                |                  | I    | 955.5459        | 478.2766        | 937.5353       | 469.2713         | 10 |
| 3  | 411.2238        | 206.1155        | 394.1973  | 197.6023         | 393.2132       | 197.1103         | T    | 842.4618        | 421.7345        | 824.4512       | 412.7293         | 9  |
| 4  | <b>498.2558</b> | 249.6316        | 481.2293  | 241.1183         | 480.2453       | 240.6263         | S    | 741.4141        | 371.2107        | 723.4036       | 362.2054         | 8  |
| 5  | 595.3086        | 298.1579        | 578.2821  | 289.6447         | 577.2980       | 289.1527         | P    | <b>654.3821</b> | 327.6947        | 636.3715       | 318.6894         | 7  |
| 6  | 708.3927        | 354.7000        | 691.3661  | 346.1867         | 690.3821       | 345.6947         | I    | <b>557.3293</b> | 279.1683        | 539.3188       | 270.1630         | 6  |
| 7  | 805.4454        | 403.2264        | 788.4189  | 394.7131         | 787.4349       | 394.2211         | P    | 444.2453        | 222.6263        | 426.2347       | 213.6210         | 5  |
| 8  | 876.4825        | 438.7449        | 859.4560  | 430.2316         | 858.4720       | 429.7396         | A    | <b>347.1925</b> | 174.0999        | 329.1819       | 165.0946         | 4  |
| 9  | 989.5666        | 495.2869        | 972.5401  | 486.7737         | 971.5560       | 486.2817         | I    | 276.1554        | 138.5813        | 258.1448       | 129.5761         | 3  |
| 10 | 1046.5881       | 523.7977        | 1029.5615 | 515.2844         | 1028.5775      | 514.7924         | G    | 163.0713        | 82.0393         | 145.0608       | 73.0340          | 2  |
| 11 |                 |                 |           |                  |                |                  | S    | 106.0499        | 53.5286         | 88.0393        | 44.5233          | 1  |

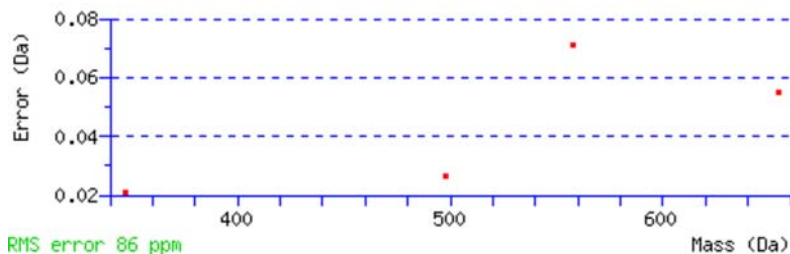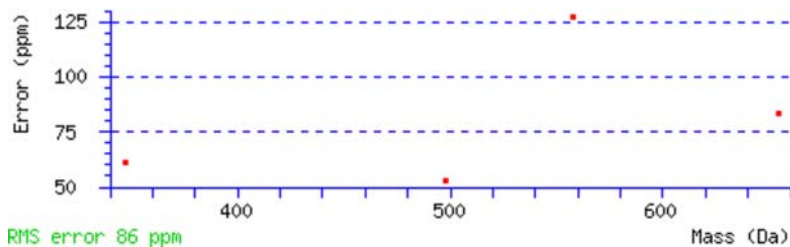

NCBI **BLAST** search of [QITSPIPAIGS](#)

(Parameters: blastp, nr protein database, expect=20000, no filter, PAM30)

Other BLAST [web gateways](#)

**All matches to this query**

| Score | Mr(calc): | Delta   | Sequence                    |
|-------|-----------|---------|-----------------------------|
| 13.4  | 1209.7524 | 0.0288  | <a href="#">GLKQPTPVQL</a>  |
| 13.3  | 1209.7445 | 0.0368  | <a href="#">KAKTKPPLQVT</a> |
| 12.0  | 1209.6466 | 0.1347  | <a href="#">QSRNAPLPSLQ</a> |
| 10.2  | 1209.6580 | 0.1233  | <a href="#">PGFQPIPCKP</a>  |
| 10.2  | 1209.6969 | 0.0844  | <a href="#">QITSPIPAIGS</a> |
| 10.2  | 1209.6717 | 0.1095  | <a href="#">SRSVPLPAEQ</a>  |
| 10.1  | 1209.7160 | 0.0652  | <a href="#">VNNVPLPNTL</a>  |
| 9.9   | 1209.7048 | 0.0765  | <a href="#">ELSPPLPLSQ</a>  |
| 9.9   | 1209.8410 | -0.0598 | <a href="#">IPIPPLPSKL</a>  |
| 9.9   | 1209.7524 | 0.0288  | <a href="#">KNGPLPLQS</a>   |

Mascot: <http://www.matrixscience.com/>

Peptide 7 - Run 1 593 (14.078) Sm (SG, 2x4.00)

1: TOF MS ES+  
82.6

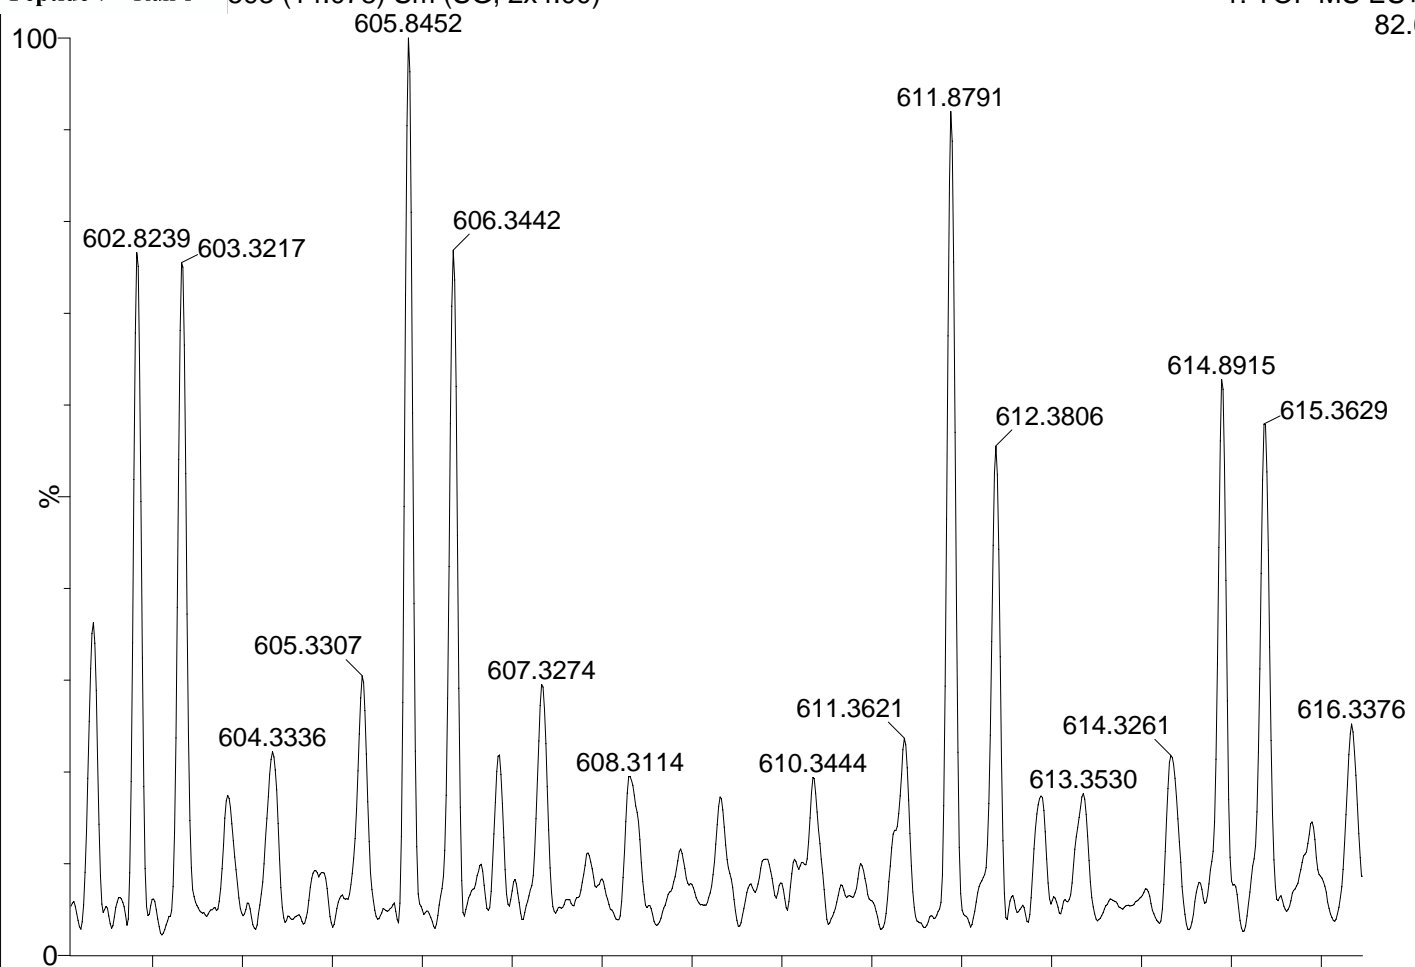

Peptide 7 - Run 2 748 (14.989) Sm (SG, 2x4.00)

1: TOF MS ES+  
62.0

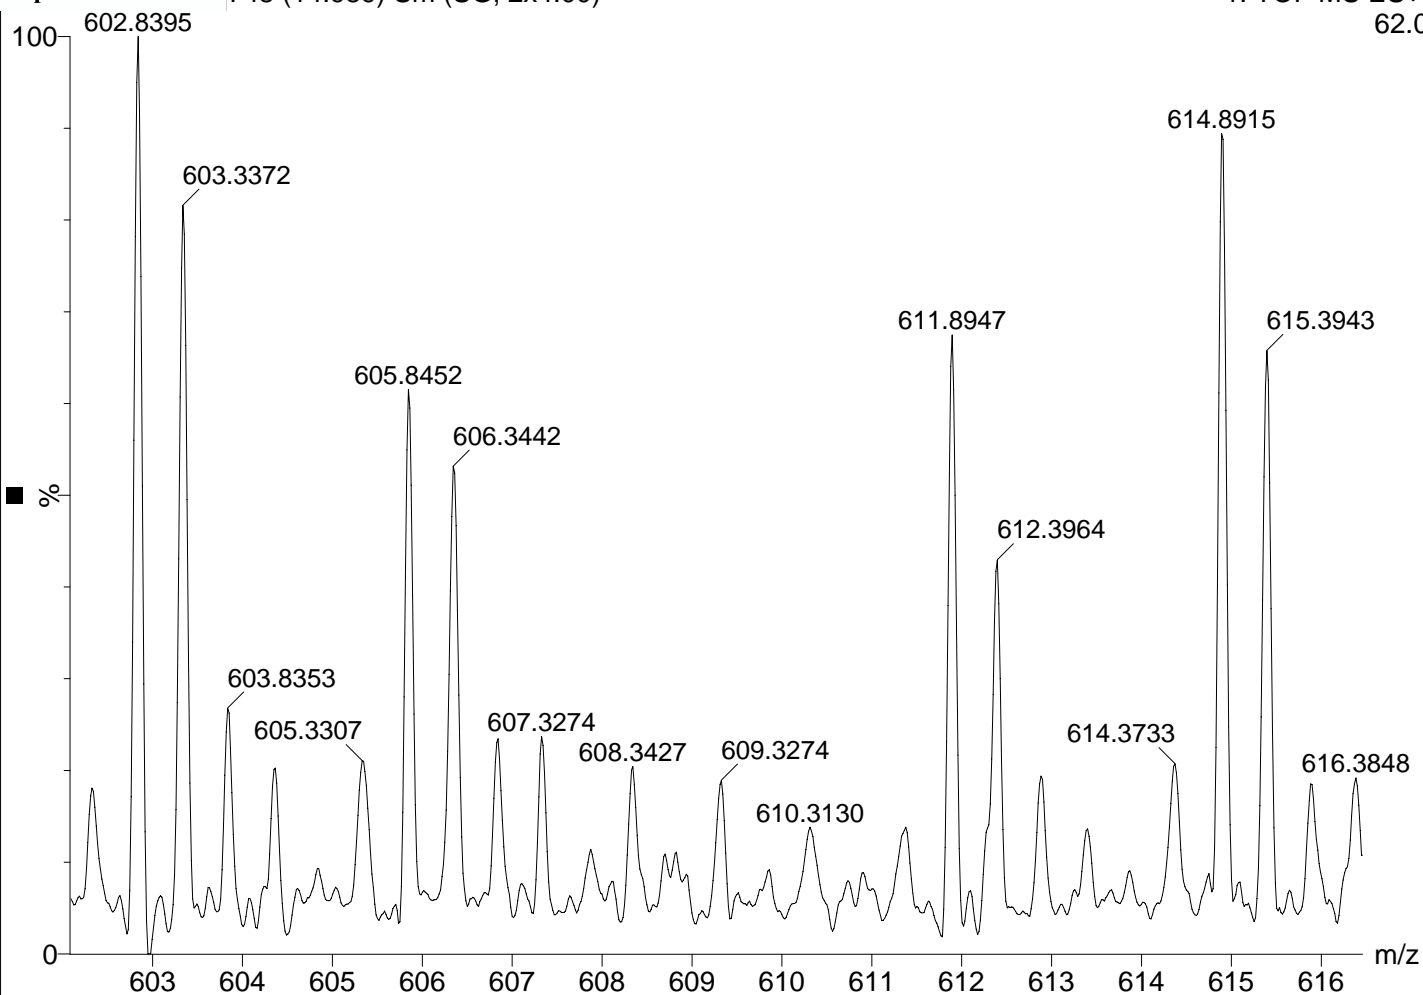

# Mascot Search Results

## Peptide View

### Peptide 7

MS/MS Fragmentation of **ADGIVSKNF**

Found in **RS21\_HUMAN**, 40S ribosomal protein S21 OS=Homo sapiens GN=RPS21 PE=1 SV=1

Match to Query 237: 1209.732728 from(605.873640,2+) intensity(3452.0000)

Title: 318: Sum of 2 scans in range 813 (rt=838.537, f=3, i=64) to 814 (rt=839.563, f=4, i=44) [C:\Users\synapt\Desktop\28062011 raw\290611 Leandro E1.raw]

Data file 290611 Chris E1.mgf

Click mouse within plot area to zoom in by factor of two about that point

Or,  to  Da

Label all possible matches  Label matches used for scoring

**Monoisotopic mass of neutral peptide Mr(calc):** 1209.7240

**Variable modifications:**

**N-term :** GIST-Quat:2H(3) (N-term), with neutral loss 62.0923

**K7 :** GIST-Quat:2H(3) (K), with neutral loss 62.0923

**Ions Score:** 10 **Expect:** 4.9e+003

**Matches :** 5/74 fragment ions using 11 most intense peaks ([help](#))

| # | b               | b <sup>++</sup> | b <sup>*</sup> | b <sup>+++</sup> | b <sup>0</sup> | b <sup>0++</sup> | Seq. | y               | y <sup>++</sup> | y <sup>*</sup> | y <sup>+++</sup> | y <sup>0</sup> | y <sup>0++</sup> | # |
|---|-----------------|-----------------|----------------|------------------|----------------|------------------|------|-----------------|-----------------|----------------|------------------|----------------|------------------|---|
| 1 | 140.0706        | 70.5389         |                |                  |                |                  | A    |                 |                 |                |                  |                |                  | 9 |
| 2 | <b>255.0975</b> | 128.0524        |                |                  | 237.0870       | 119.0471         | D    | 947.4833        | 474.2453        | 930.4567       | 465.7320         | 929.4727       | 465.2400         | 8 |
| 3 | 312.1190        | 156.5631        |                |                  | 294.1084       | 147.5579         | G    | <b>832.4563</b> | 416.7318        | 815.4298       | 408.2185         | 814.4458       | 407.7265         | 7 |
| 4 | <b>425.2031</b> | 213.1052        |                |                  | 407.1925       | 204.0999         | I    | 775.4349        | 388.2211        | 758.4083       | 379.7078         | 757.4243       | 379.2158         | 6 |
| 5 | 524.2715        | 262.6394        |                |                  | 506.2609       | 253.6341         | V    | <b>662.3508</b> | 331.6790        | 645.3243       | 323.1658         | 644.3402       | 322.6738         | 5 |
| 6 | 611.3035        | 306.1554        |                |                  | 593.2930       | 297.1501         | S    | <b>563.2824</b> | 282.1448        | 546.2558       | 273.6316         | 545.2718       | 273.1395         | 4 |
| 7 | 807.4247        | 404.2160        | 790.3981       | 395.7027         | 789.4141       | 395.2107         | K    | 476.2504        | 238.6288        | 459.2238       | 230.1155         |                |                  | 3 |

|   |          |          |          |          |          |          |   |          |          |          |          |  |  |   |
|---|----------|----------|----------|----------|----------|----------|---|----------|----------|----------|----------|--|--|---|
| 8 | 921.4676 | 461.2374 | 904.4411 | 452.7242 | 903.4571 | 452.2322 | N | 280.1292 | 140.5682 | 263.1026 | 132.0550 |  |  | 2 |
| 9 |          |          |          |          |          |          | F | 166.0863 | 83.5468  |          |          |  |  | 1 |

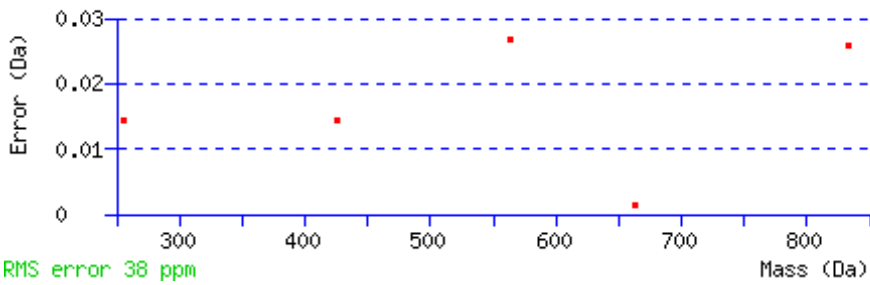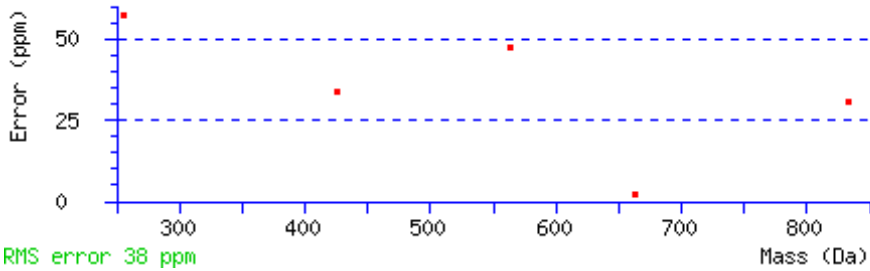

NCBI **BLAST** search of [ADGIVSKNF](#)

(Parameters: blastp, nr protein database, expect=20000, no filter, PAM30)

Other BLAST [web gateways](#)

**All matches to this query**

| Score | Mr(calc): | Delta   | Sequence                    |
|-------|-----------|---------|-----------------------------|
| 16.0  | 1209.8444 | -0.1116 | <a href="#">AKVKVIGVH</a>   |
| 9.8   | 1209.7240 | 0.0087  | <a href="#">ADGIVSKNF</a>   |
| 9.8   | 1209.8444 | -0.1116 | <a href="#">AKVKVIGVH</a>   |
| 9.8   | 1209.8444 | -0.1116 | <a href="#">AKVKVIGVH</a>   |
| 9.8   | 1209.7240 | 0.0087  | <a href="#">EGGIVSKNF</a>   |
| 9.3   | 1209.7279 | 0.0048  | <a href="#">NQVAVSSLSAV</a> |
| 8.9   | 1209.6909 | 0.0418  | <a href="#">KNSECLKE</a>    |
| 8.7   | 1209.7273 | 0.0054  | <a href="#">NKMTSLKE</a>    |
| 8.2   | 1209.6663 | 0.0664  | <a href="#">NKNQEEAGGK</a>  |
| 8.1   | 1209.7623 | -0.0296 | <a href="#">EGPPRGKGF</a>   |

Mascot: <http://www.matrixscience.com/>



Peptide 8 – Run 1 670 (16.792) Sm (SG, 2x4.00)

1: TOF MS ES+  
50.9

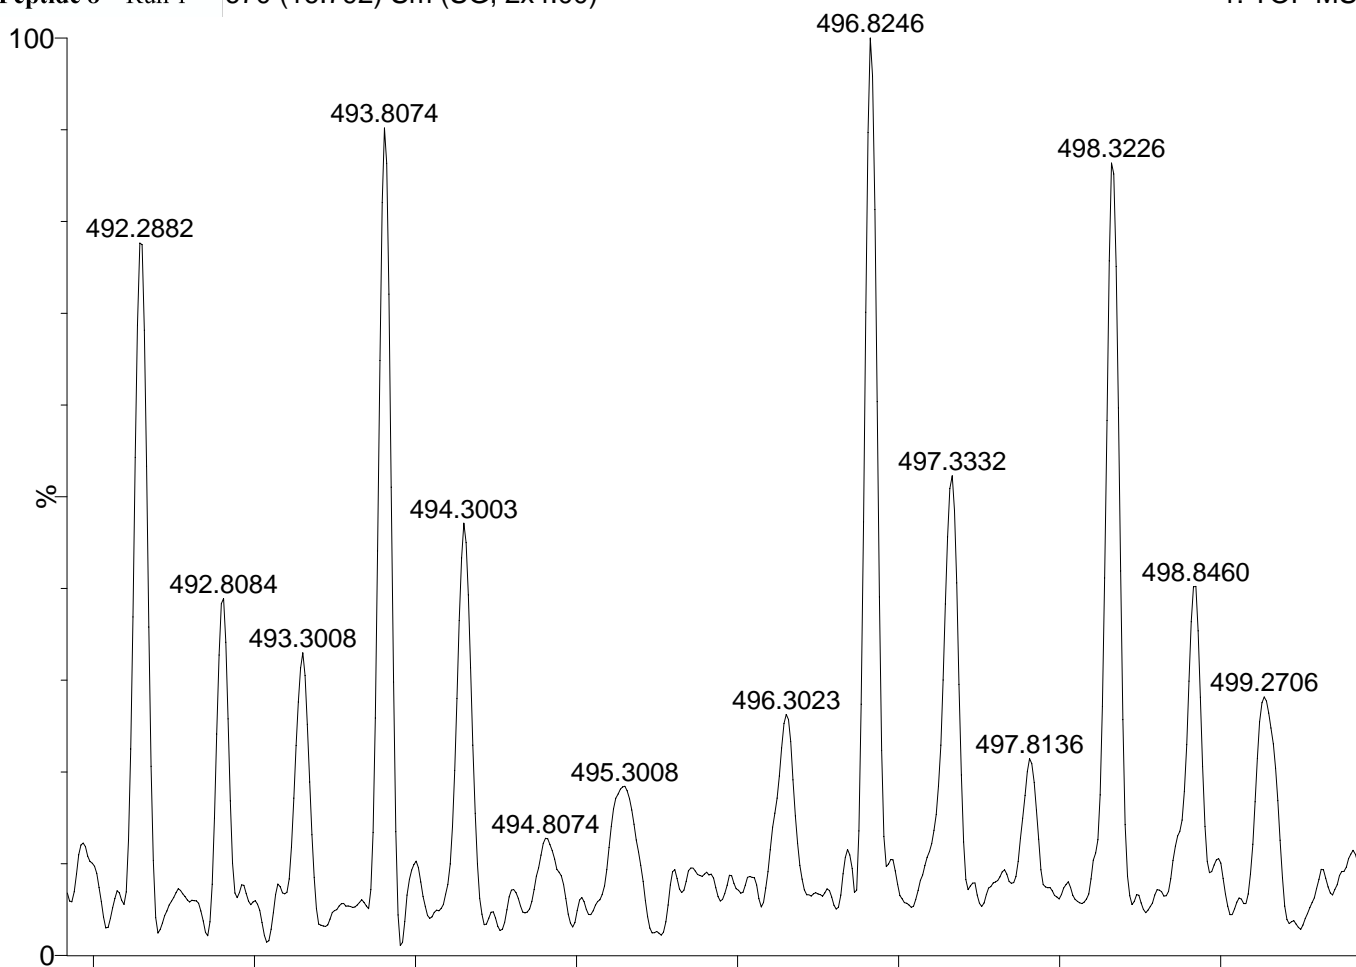

Peptide 8 – Run 2 861 (17.874) Sm (SG, 2x4.00)

1: TOF MS ES+  
33.1

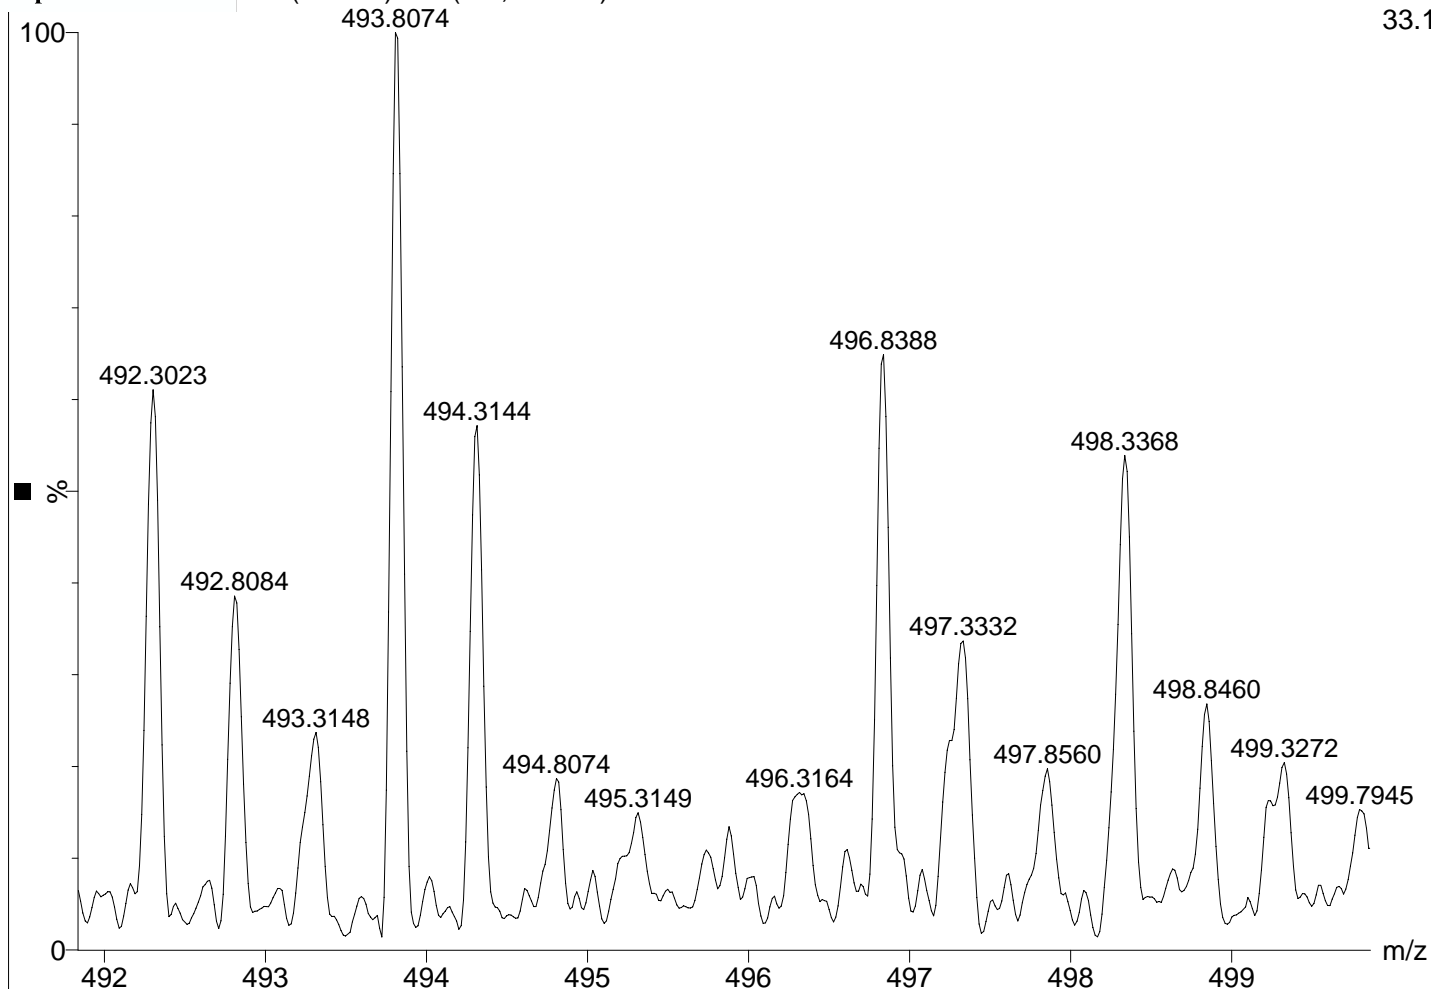

# Mascot Search Results

## Peptide View

### Peptide 8

MS/MS Fragmentation of **RIIVENL**

Found in **PTBP1\_HUMAN**, Polypyrimidine tract-binding protein 1 OS=Homo sapiens GN=PTBP1 PE=1 SV=1

Match to Query 81: 991.683668 from(496.849110,2+) intensity(4349.0000)

Title: 433: Sum of 3 scans in range 970 (rt=1000.36, f=2, i=125) to 974 (rt=1004.46, f=2, i=127) [C:\Users\synapt\Desktop\28062011 raw\290611 Leandro E1.raw]

Data file 290611 Chris E1.mgf

Click mouse within plot area to zoom in by factor of two about that point

Or,  to  Da

Label all possible matches  Label matches used for scoring

**Monoisotopic mass of neutral peptide Mr(calc):** 991.6740

**Variable modifications:**

**N-term :** GIST-Quat:2H(9) (N-term), with neutral loss 68.1300

**Ions Score:** 15 **Expect:** 1.2e+003

**Matches :** 5/58 fragment ions using 9 most intense peaks ([help](#))

| # | b               | b <sup>++</sup> | b <sup>*</sup>  | b <sup>+++</sup> | b <sup>0</sup> | b <sup>0++</sup> | Seq. | y        | y <sup>++</sup> | y <sup>*</sup> | y <sup>+++</sup> | y <sup>0</sup> | y <sup>0++</sup> | # |
|---|-----------------|-----------------|-----------------|------------------|----------------|------------------|------|----------|-----------------|----------------|------------------|----------------|------------------|---|
| 1 | 225.1346        | 113.0709        | 208.1081        | 104.5577         |                |                  | R    |          |                 |                |                  |                |                  | 7 |
| 2 | 338.2187        | 169.6130        | 321.1921        | 161.0997         |                |                  | I    | 700.4240 | 350.7156        | 683.3974       | 342.2023         | 682.4134       | 341.7103         | 6 |
| 3 | <b>451.3027</b> | 226.1550        | 434.2762        | 217.6417         |                |                  | I    | 587.3399 | <b>294.1736</b> | 570.3134       | 285.6603         | 569.3293       | 285.1683         | 5 |
| 4 | <b>550.3711</b> | 275.6892        | 533.3446        | 267.1759         |                |                  | V    | 474.2558 | 237.6316        | 457.2293       | 229.1183         | 456.2453       | 228.6263         | 4 |
| 5 | <b>679.4137</b> | 340.2105        | 662.3872        | 331.6972         | 661.4032       | 331.2052         | E    | 375.1874 | 188.0974        | 358.1609       | 179.5841         | 357.1769       | 179.0921         | 3 |
| 6 | 793.4567        | 397.2320        | <b>776.4301</b> | 388.7187         | 775.4461       | 388.2267         | N    | 246.1448 | 123.5761        | 229.1183       | 115.0628         |                |                  | 2 |
| 7 |                 |                 |                 |                  |                |                  | L    | 132.1019 | 66.5546         |                |                  |                |                  | 1 |

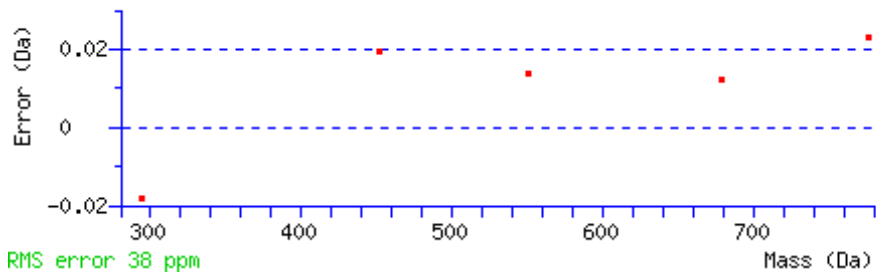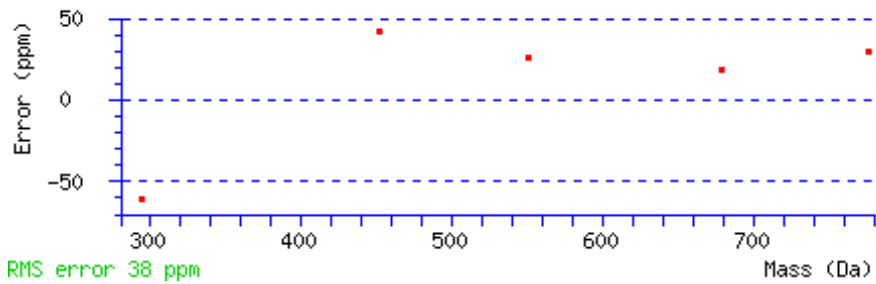

NCBI **BLAST** search of [RIIVENL](#)

(Parameters: blastp, nr protein database, expect=20000, no filter, PAM30)

Other BLAST [web gateways](#)

**All matches to this query**

| Score | Mr(calc): | Delta  | Sequence                 |
|-------|-----------|--------|--------------------------|
| 26.9  | 991.5338  | 0.1498 | <a href="#">ADEKKFQ</a>  |
| 23.8  | 991.5226  | 0.1611 | <a href="#">ADELYAAL</a> |
| 15.8  | 991.5702  | 0.1135 | <a href="#">ADKKEFK</a>  |
| 14.5  | 991.6740  | 0.0097 | <a href="#">RIIVENL</a>  |
| 14.5  | 991.6740  | 0.0097 | <a href="#">RLIVENL</a>  |
| 14.5  | 991.6740  | 0.0097 | <a href="#">RLLVENL</a>  |
| 14.0  | 991.6740  | 0.0097 | <a href="#">KPKKENI</a>  |
| 14.0  | 991.6740  | 0.0097 | <a href="#">KPKKENL</a>  |
| 13.5  | 991.6740  | 0.0097 | <a href="#">PKAGKEKV</a> |
| 13.4  | 991.6740  | 0.0097 | <a href="#">KPKKENI</a>  |

Mascot: <http://www.matrixscience.com/>

Peptide 9 – Run 1 | 686 (17.376) Sm (SG, 2x4.00)

1: TOF MS ES+  
38.3

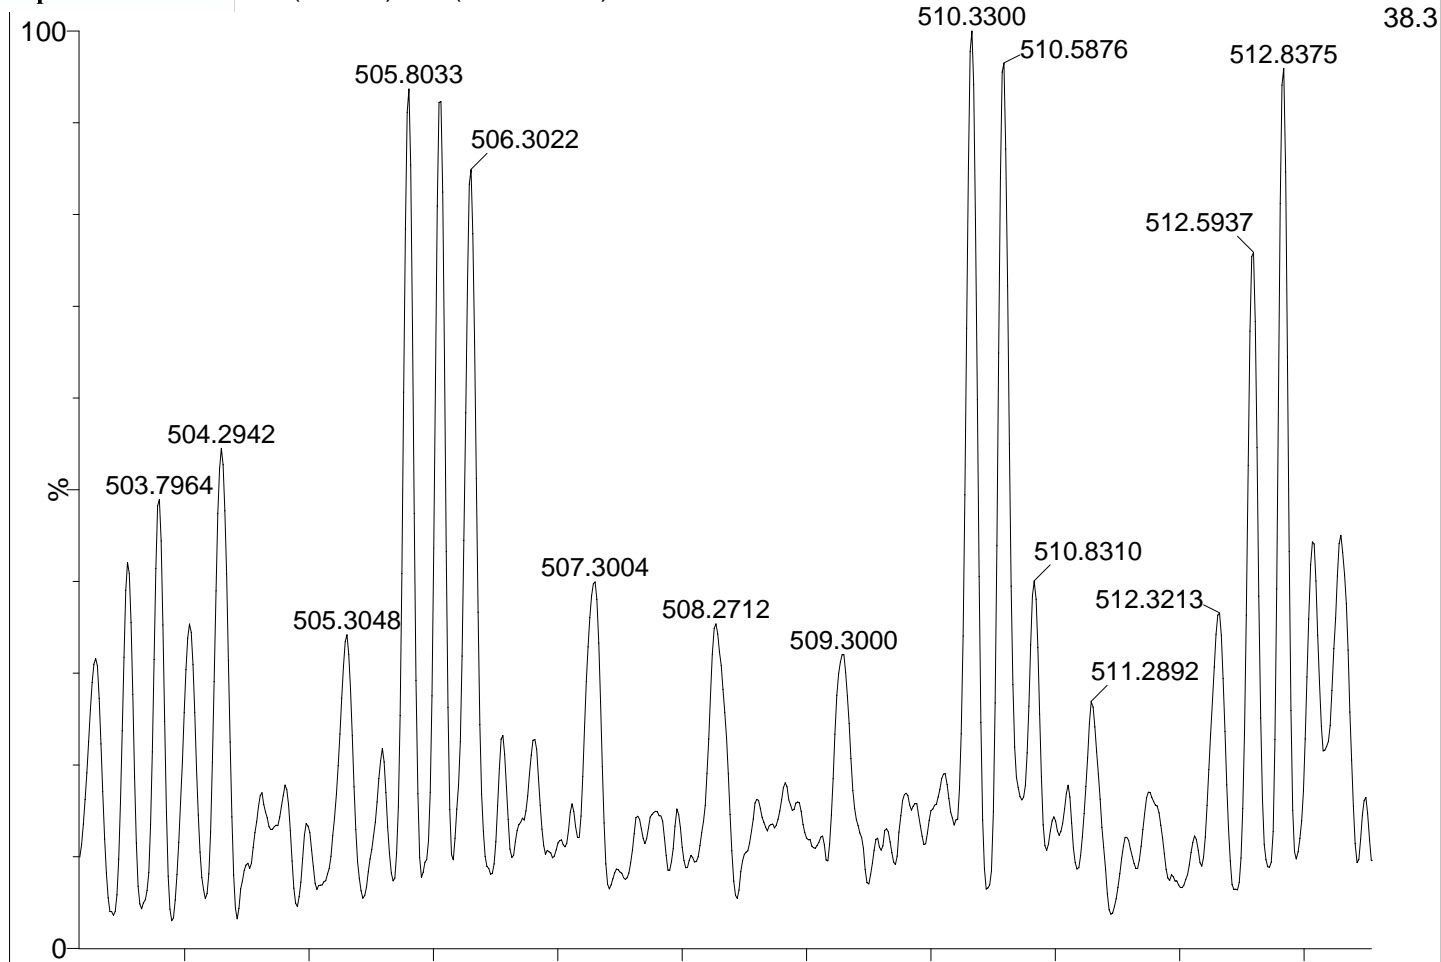

Peptide 9 – Run 2 | 886 (18.491) Sm (SG, 2x4.00)

1: TOF MS ES+  
14.6

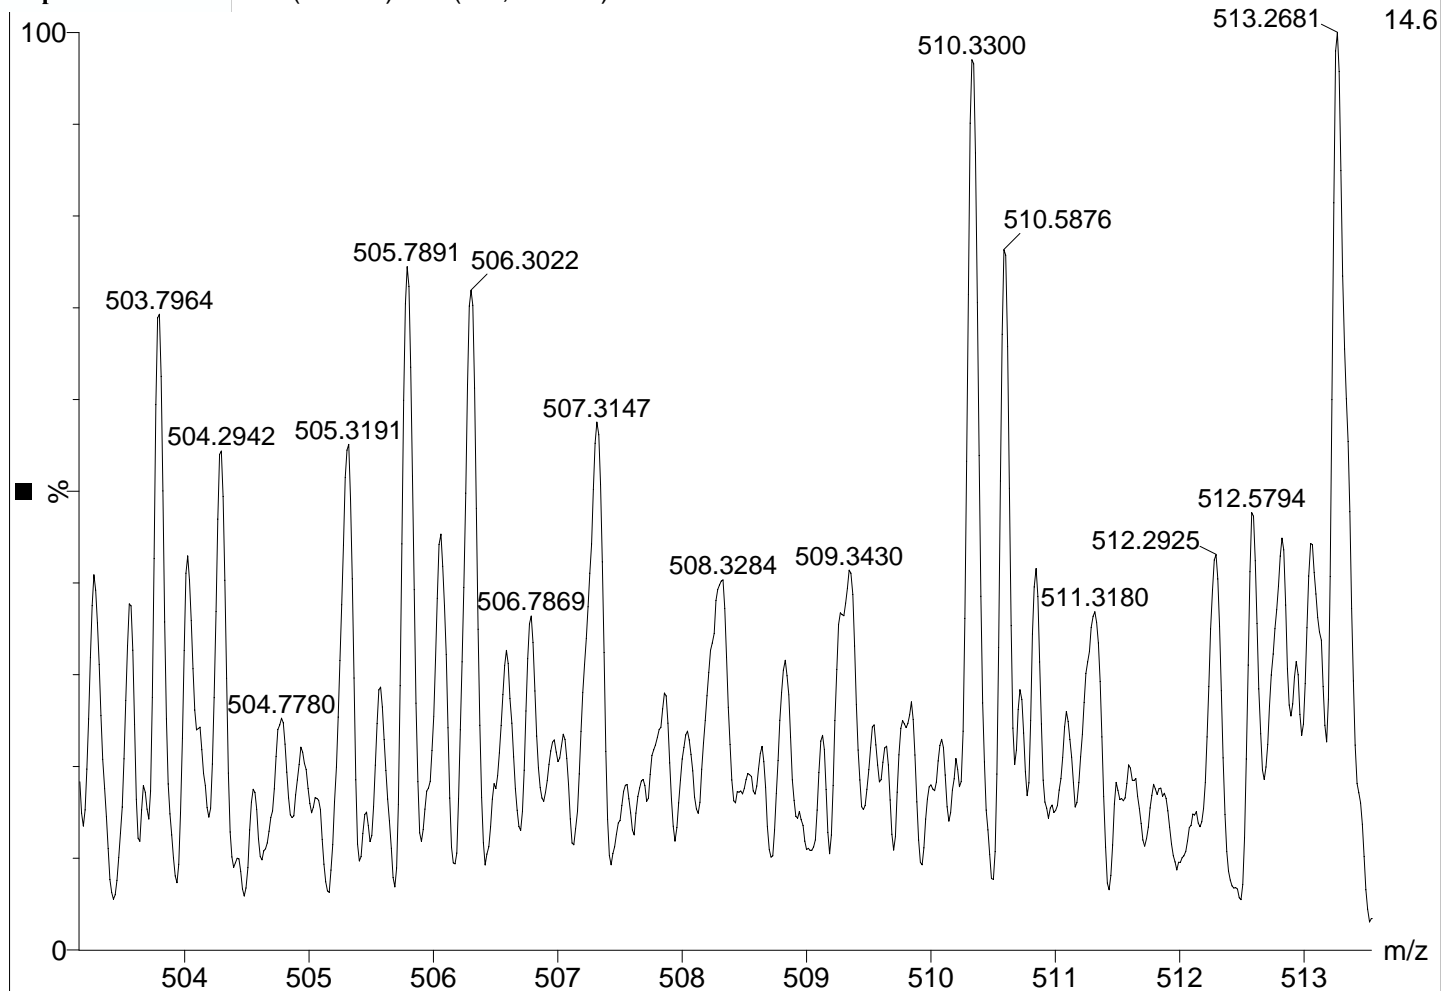

# Mascot Search Results

## Peptide View

### Peptide 9

MS/MS Fragmentation of **KEQISDIDDAVRKL**

Found in **TCP4\_HUMAN**, Activated RNA polymerase II transcriptional coactivator p15 OS=Homo sapiens GN=SUB1 PE=1 SV=3

Match to Query 519: 2037.385616 from(510.353680,4+) intensity(3594.0000)

Title: 453: Sum of 2 scans in range 1008 (rt=1039.47, f=2, i=136) to 1009 (rt=1040.49, f=3, i=94) [C:\Users\synapt\Desktop\28062011 raw\290611 Leandro E1.raw]

Data file 290611 Chris E1.mgf

Click mouse within plot area to zoom in by factor of two about that point

Or,  to  Da  
 Label all possible matches  Label matches used for scoring

**Monoisotopic mass of neutral peptide Mr(calc):** 2037.3419

**Variable modifications:**

**N-term** : GIST-Quat:2H(9) (N-term), with neutral loss 68.1300

**K1** : GIST-Quat:2H(9) (K), with neutral loss 68.1300

**K13** : GIST-Quat:2H(9) (K), with neutral loss 68.1300

**Ions Score:** 13 **Expect:** 1.9e+003

**Matches** : 6/142 fragment ions using 15 most intense peaks ([help](#))

| # | b               | b <sup>++</sup> | b <sup>*</sup> | b <sup>***</sup> | b <sup>0</sup> | b <sup>0++</sup> | Seq.     | y                | y <sup>++</sup> | y <sup>*</sup> | y <sup>***</sup> | y <sup>0</sup> | y <sup>0++</sup> | #  |
|---|-----------------|-----------------|----------------|------------------|----------------|------------------|----------|------------------|-----------------|----------------|------------------|----------------|------------------|----|
| 1 | 265.1547        | 133.0810        | 248.1281       | 124.5677         |                |                  | <b>K</b> |                  |                 |                |                  |                |                  | 14 |
| 2 | <b>394.1973</b> | 197.6023        | 377.1707       | 189.0890         | 376.1867       | 188.5970         | <b>E</b> | 1569.8119        | 785.4096        | 1552.7853      | 776.8963         | 1551.8013      | 776.4043         | 13 |
| 3 | <b>522.2558</b> | 261.6316        | 505.2293       | 253.1183         | 504.2453       | 252.6263         | <b>Q</b> | 1440.7693        | 720.8883        | 1423.7427      | 712.3750         | 1422.7587      | 711.8830         | 12 |
| 4 | 635.3399        | 318.1736        | 618.3134       | 309.6603         | 617.3293       | 309.1683         | <b>I</b> | 1312.7107        | 656.8590        | 1295.6842      | 648.3457         | 1294.7001      | 647.8537         | 11 |
| 5 | 722.3719        | 361.6896        | 705.3454       | 353.1763         | 704.3614       | 352.6843         | <b>S</b> | <b>1199.6266</b> | 600.3170        | 1182.6001      | 591.8037         | 1181.6161      | 591.3117         | 10 |
| 6 | 837.3989        | 419.2031        | 820.3723       | 410.6898         | 819.3883       | 410.1978         | <b>D</b> | 1112.5946        | 556.8009        | 1095.5681      | 548.2877         | 1094.5841      | 547.7957         | 9  |
| 7 | 950.4829        | 475.7451        | 933.4564       | 467.2318         | 932.4724       | 466.7398         | <b>I</b> | <b>997.5677</b>  | 499.2875        | 980.5411       | 490.7742         | 979.5571       | 490.2822         | 8  |
| 8 | 1065.5099       | 533.2586        | 1048.4833      | 524.7453         | 1047.4993      | 524.2533         | <b>D</b> | 884.4836         | 442.7454        | 867.4571       | 434.2322         | 866.4730       | 433.7402         | 7  |
| 9 | 1180.5368       | 590.7721        | 1163.5103      | 582.2588         | 1162.5263      | 581.7668         | <b>D</b> | <b>769.4567</b>  | 385.2320        | 752.4301       | 376.7187         | 751.4461       | 376.2267         | 6  |

|    |           |          |           |          |           |          |   |          |          |          |          |  |  |   |
|----|-----------|----------|-----------|----------|-----------|----------|---|----------|----------|----------|----------|--|--|---|
| 10 | 1251.5739 | 626.2906 | 1234.5474 | 617.7773 | 1233.5634 | 617.2853 | A | 654.4297 | 327.7185 | 637.4032 | 319.2052 |  |  | 5 |
| 11 | 1350.6424 | 675.8248 | 1333.6158 | 667.3115 | 1332.6318 | 666.8195 | V | 583.3926 | 292.1999 | 566.3661 | 283.6867 |  |  | 4 |
| 12 | 1506.7435 | 753.8754 | 1489.7169 | 745.3621 | 1488.7329 | 744.8701 | R | 484.3242 | 242.6657 | 467.2976 | 234.1525 |  |  | 3 |
| 13 | 1702.8646 | 851.9360 | 1685.8381 | 843.4227 | 1684.8541 | 842.9307 | K | 328.2231 | 164.6152 | 311.1965 | 156.1019 |  |  | 2 |
| 14 |           |          |           |          |           |          | L | 132.1019 | 66.5546  |          |          |  |  | 1 |

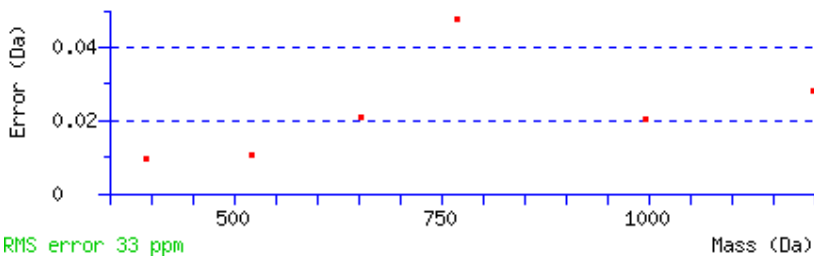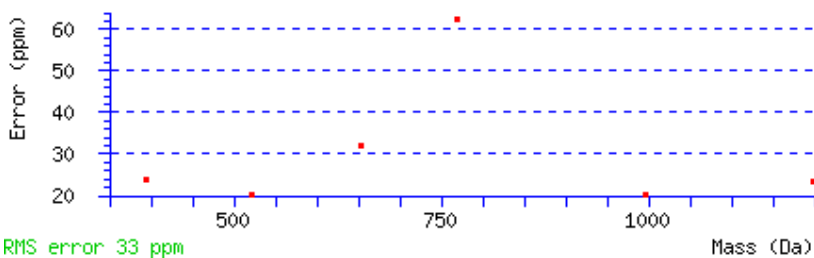

NCBI **BLAST** search of [KEQISDIDDAVRKL](#)

(Parameters: blastp, nr protein database, expect=20000, no filter, PAM30)

Other BLAST [web gateways](#)

**All matches to this query**

| Score | Mr(calc): | Delta  | Sequence                          |
|-------|-----------|--------|-----------------------------------|
| 13.0  | 2037.3419 | 0.0437 | <a href="#">KEQISDIDDAVRKL</a>    |
| 11.7  | 2037.2415 | 0.1442 | <a href="#">GNATKNDDLKPKINK</a>   |
| 11.7  | 2037.2415 | 0.1442 | <a href="#">GNATKNDDLKPKINK</a>   |
| 11.7  | 2037.2415 | 0.1442 | <a href="#">GNATKNDDLKPKINK</a>   |
| 9.9   | 2037.2415 | 0.1442 | <a href="#">GNATKNDDLKPKINK</a>   |
| 9.9   | 2037.2415 | 0.1442 | <a href="#">GNATKNDDLKPKINK</a>   |
| 9.9   | 2037.2415 | 0.1442 | <a href="#">GNATKNDDLKPKINK</a>   |
| 9.5   | 2037.2548 | 0.1308 | <a href="#">IVIFDLTLARLKAVDNT</a> |
| 8.5   | 2037.3837 | 0.0019 | <a href="#">IVLKGVVQVEKIKSPE</a>  |
| 8.5   | 2037.3837 | 0.0019 | <a href="#">IVLKGVVQVEKIKSPE</a>  |

Mascot: <http://www.matrixscience.com/>

Peptide 10 – Run 1 726 (18.750) Sm (SG, 2x4.00)

1: TOF MS ES+  
518

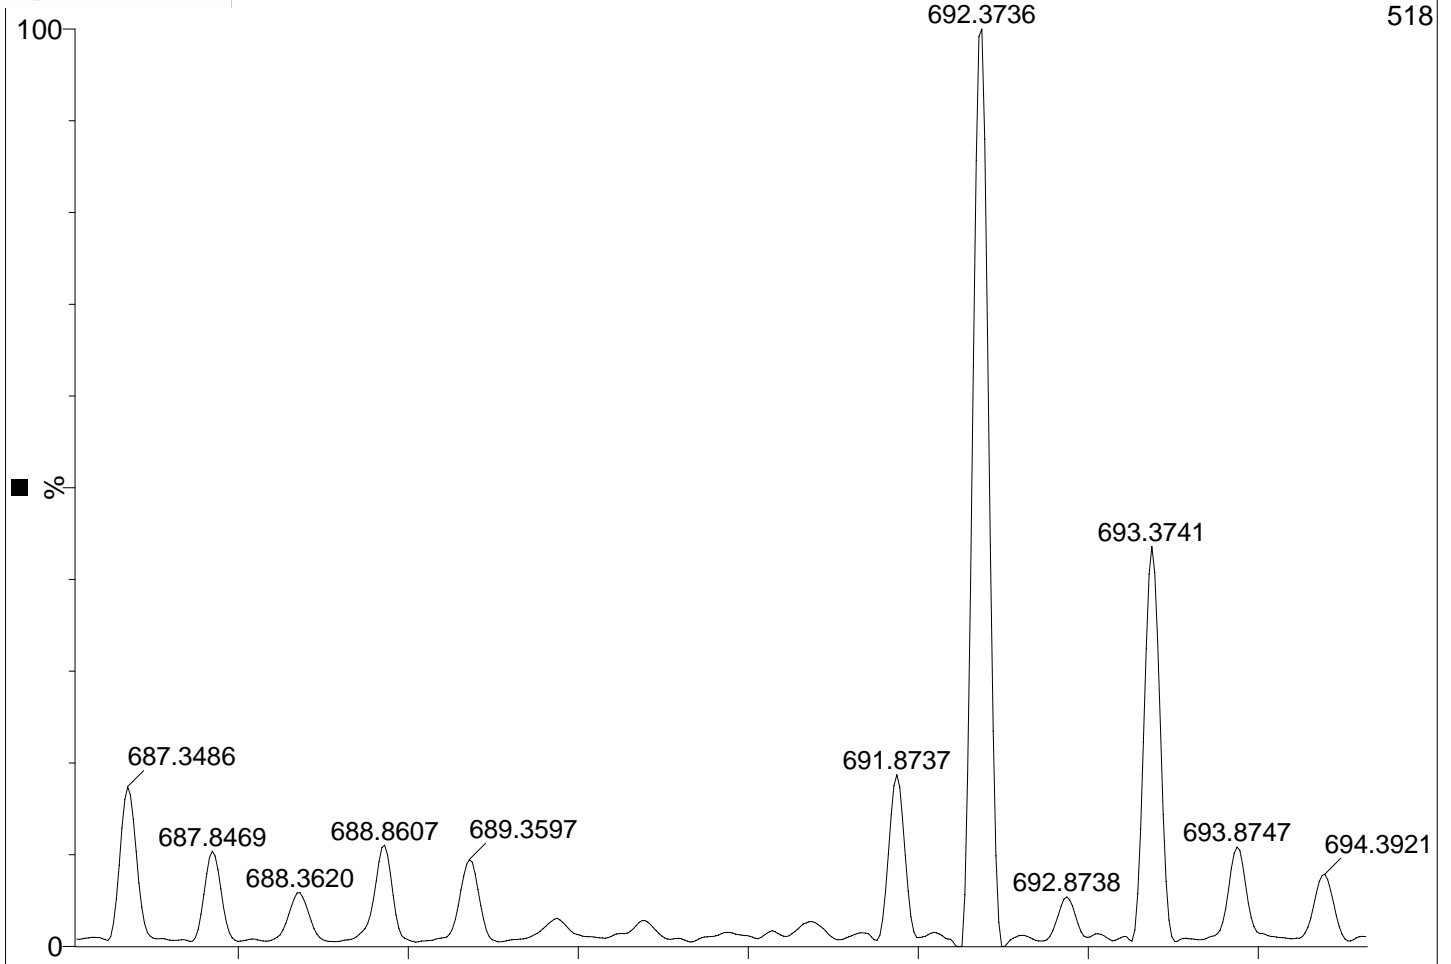

Peptide 10 – Run 2 923 (19.453) Sm (SG, 2x4.00)

1: TOF MS ES+  
120

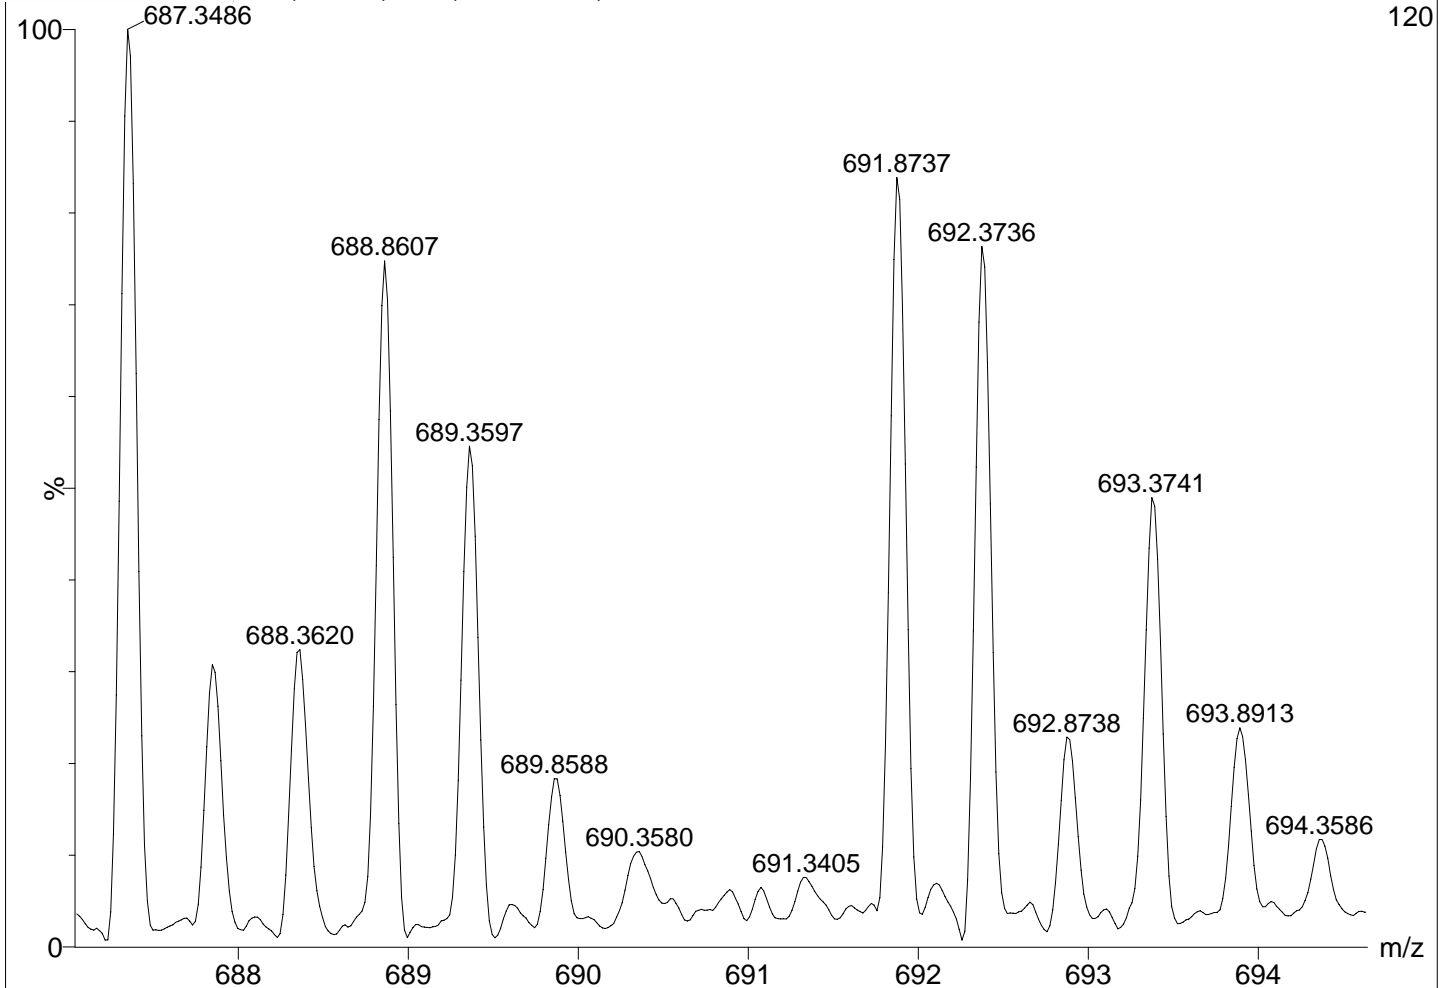

# Mascot Search Results

## Peptide View

### Peptide 10

MS/MS Fragmentation of **AVDGEPLGRVSF**

Found in **PPIA\_HUMAN**, Peptidyl-prolyl cis-trans isomerase A OS=Homo sapiens GN=PPIA PE=1 SV=2

Match to Query 322: 1372.760388 from(687.387470,2+) intensity(3331.0000)

Title: 511: Sum of 2 scans in range 1113 (rt=1147.54, f=2, i=166) to 1114 (rt=1148.56, f=2, i=167) [C:\Users\synapt\Desktop\28062011 raw\290611 Leandro E1.raw]

Data file 290611 Chris E1.mgf

Click mouse within plot area to zoom in by factor of two about that point

Or,  to  Da

Label all possible matches  Label matches used for scoring

**Monoisotopic mass of neutral peptide Mr(calc):** 1372.7351

**Variable modifications:**

**N-term :** GIST-Quat (N-term), with neutral loss 59.0735

**Ions Score:** 16 **Expect:** 1.3e+003

**Matches :** 6/104 fragment ions using 13 most intense peaks ([help](#))

| #  | b         | b <sup>++</sup> | b <sup>*</sup> | b <sup>*++</sup> | b <sup>0</sup> | b <sup>0++</sup> | Seq. | y         | y <sup>++</sup> | y <sup>*</sup> | y <sup>*++</sup> | y <sup>0</sup> | y <sup>0++</sup> | #  |
|----|-----------|-----------------|----------------|------------------|----------------|------------------|------|-----------|-----------------|----------------|------------------|----------------|------------------|----|
| 1  | 140.0706  | 70.5389         |                |                  |                |                  | A    |           |                 |                |                  |                |                  | 12 |
| 2  | 239.1390  | 120.0731        |                |                  |                |                  | V    | 1175.6055 | 588.3064        | 1158.5790      | 579.7931         | 1157.5949      | 579.3011         | 11 |
| 3  | 354.1660  | 177.5866        |                |                  | 336.1554       | 168.5813         | D    | 1076.5371 | 538.7722        | 1059.5106      | 530.2589         | 1058.5265      | 529.7669         | 10 |
| 4  | 411.1874  | 206.0974        |                |                  | 393.1769       | 197.0921         | G    | 961.5102  | 481.2587        | 944.4836       | 472.7454         | 943.4996       | 472.2534         | 9  |
| 5  | 540.2300  | 270.6186        |                |                  | 522.2195       | 261.6134         | E    | 904.4887  | 452.7480        | 887.4621       | 444.2347         | 886.4781       | 443.7427         | 8  |
| 6  | 637.2828  | 319.1450        |                |                  | 619.2722       | 310.1397         | P    | 775.4461  | 388.2267        | 758.4196       | 379.7134         | 757.4355       | 379.2214         | 7  |
| 7  | 750.3668  | 375.6871        |                |                  | 732.3563       | 366.6818         | L    | 678.3933  | 339.7003        | 661.3668       | 331.1870         | 660.3828       | 330.6950         | 6  |
| 8  | 807.3883  | 404.1978        |                |                  | 789.3777       | 395.1925         | G    | 565.3093  | 283.1583        | 548.2827       | 274.6450         | 547.2987       | 274.1530         | 5  |
| 9  | 963.4894  | 482.2483        | 946.4629       | 473.7351         | 945.4789       | 473.2431         | R    | 508.2878  | 254.6475        | 491.2613       | 246.1343         | 490.2772       | 245.6423         | 4  |
| 10 | 1062.5578 | 531.7826        | 1045.5313      | 523.2693         | 1044.5473      | 522.7773         | V    | 352.1867  | 176.5970        |                |                  | 334.1761       | 167.5917         | 3  |
| 11 | 1149.5899 | 575.2986        | 1132.5633      | 566.7853         | 1131.5793      | 566.2933         | S    | 253.1183  | 127.0628        |                |                  | 235.1077       | 118.0575         | 2  |



|    |  |  |  |  |  |  |   |          |         |  |  |  |  |  |  |   |
|----|--|--|--|--|--|--|---|----------|---------|--|--|--|--|--|--|---|
| 12 |  |  |  |  |  |  | F | 166.0863 | 83.5468 |  |  |  |  |  |  | 1 |
|----|--|--|--|--|--|--|---|----------|---------|--|--|--|--|--|--|---|

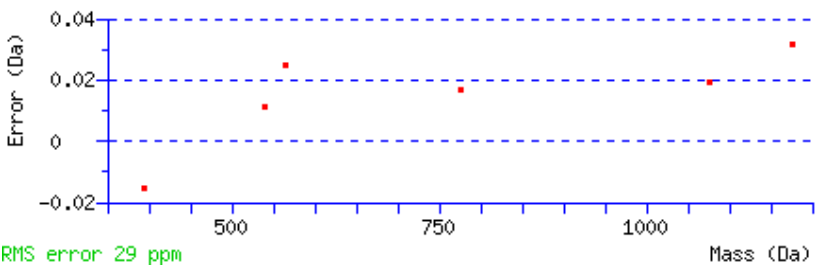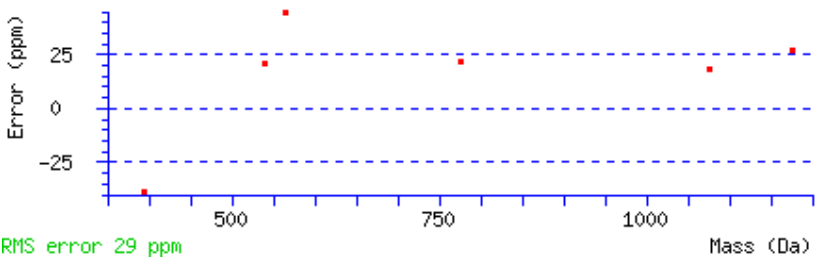

NCBI **BLAST** search of [AVDGEPLGRVSF](#)  
 (Parameters: blastp, nr protein database, expect=20000, no filter, PAM30)  
 Other BLAST [web gateways](#)

**All matches to this query**

| Score | Mr(calc): | Delta   | Sequence                      |
|-------|-----------|---------|-------------------------------|
| 15.9  | 1372.7351 | 0.0253  | <a href="#">AVDGEPLGRVSF</a>  |
| 10.7  | 1372.8152 | -0.0548 | <a href="#">LPLCLLNLY</a>     |
| 8.7   | 1372.7173 | 0.0431  | <a href="#">PLAIIGGNALQGF</a> |
| 8.2   | 1372.7602 | 0.0002  | <a href="#">AALESQPLLGFT</a>  |
| 7.9   | 1372.8177 | -0.0573 | <a href="#">AVSITITITNI</a>   |
| 7.6   | 1372.8330 | -0.0726 | <a href="#">AAPSVLAPTLPLP</a> |
| 7.3   | 1372.8191 | -0.0587 | <a href="#">SLIKHQIHTG</a>    |
| 7.2   | 1372.7674 | -0.0070 | <a href="#">AASNKKGGEKEK</a>  |
| 7.2   | 1372.8415 | -0.0811 | <a href="#">AVRRGRKTGVF</a>   |
| 7.2   | 1372.6987 | 0.0617  | <a href="#">AADTLEDLRGW</a>   |

Mascot: <http://www.matrixscience.com/>

Peptide 11 – Run 1 711 (18.252) Sm (SG, 2x4.00)

1: TOF MS ES+  
35.9

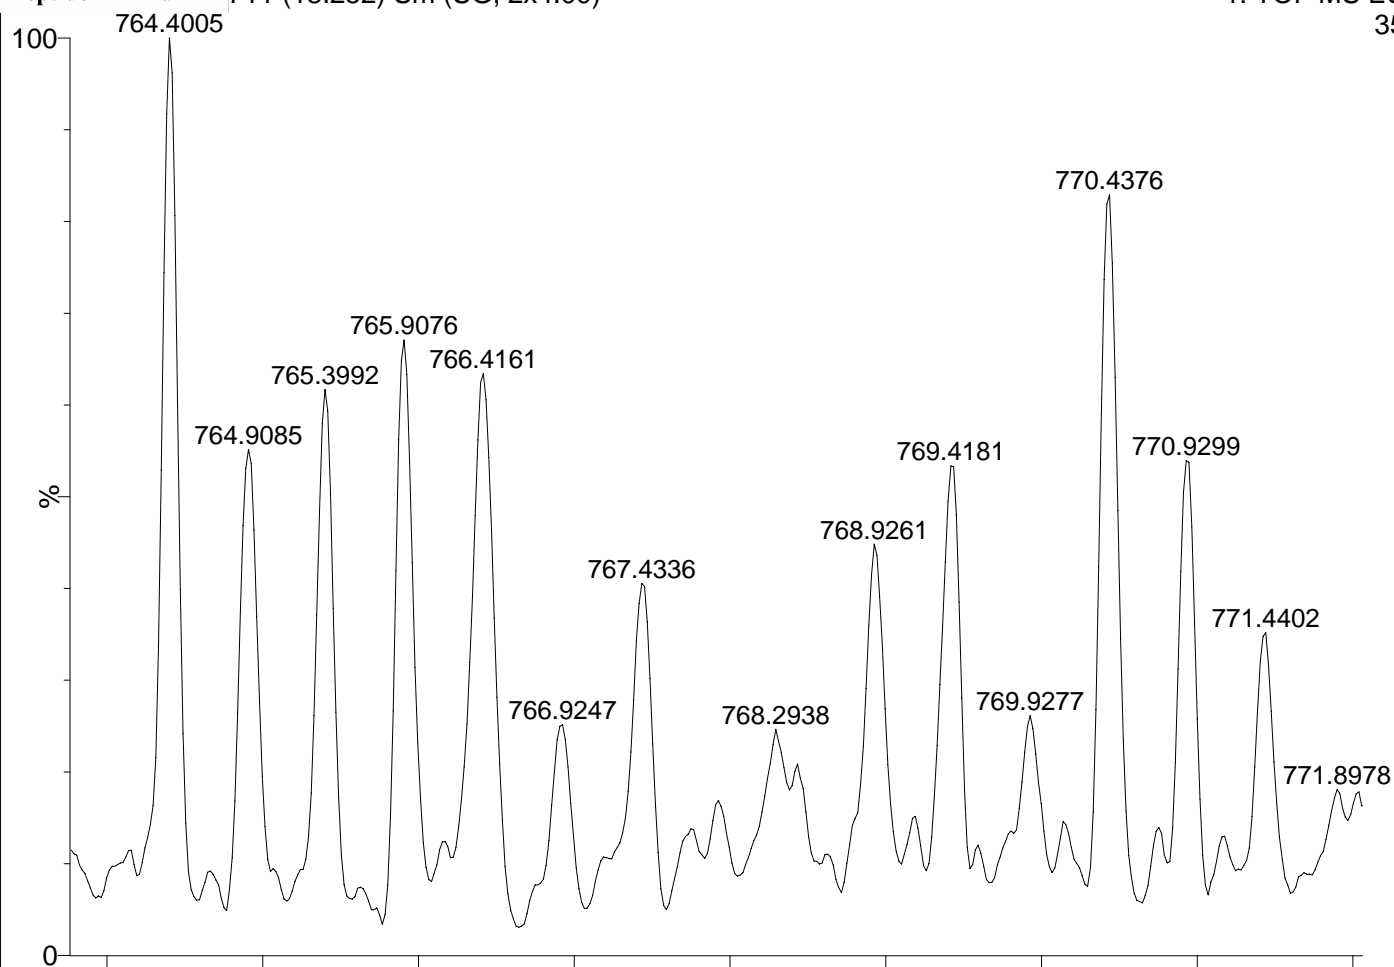

Peptide 11 – Run 2 906 (18.852) Sm (SG, 2x4.00)

1: TOF MS ES+  
22.2

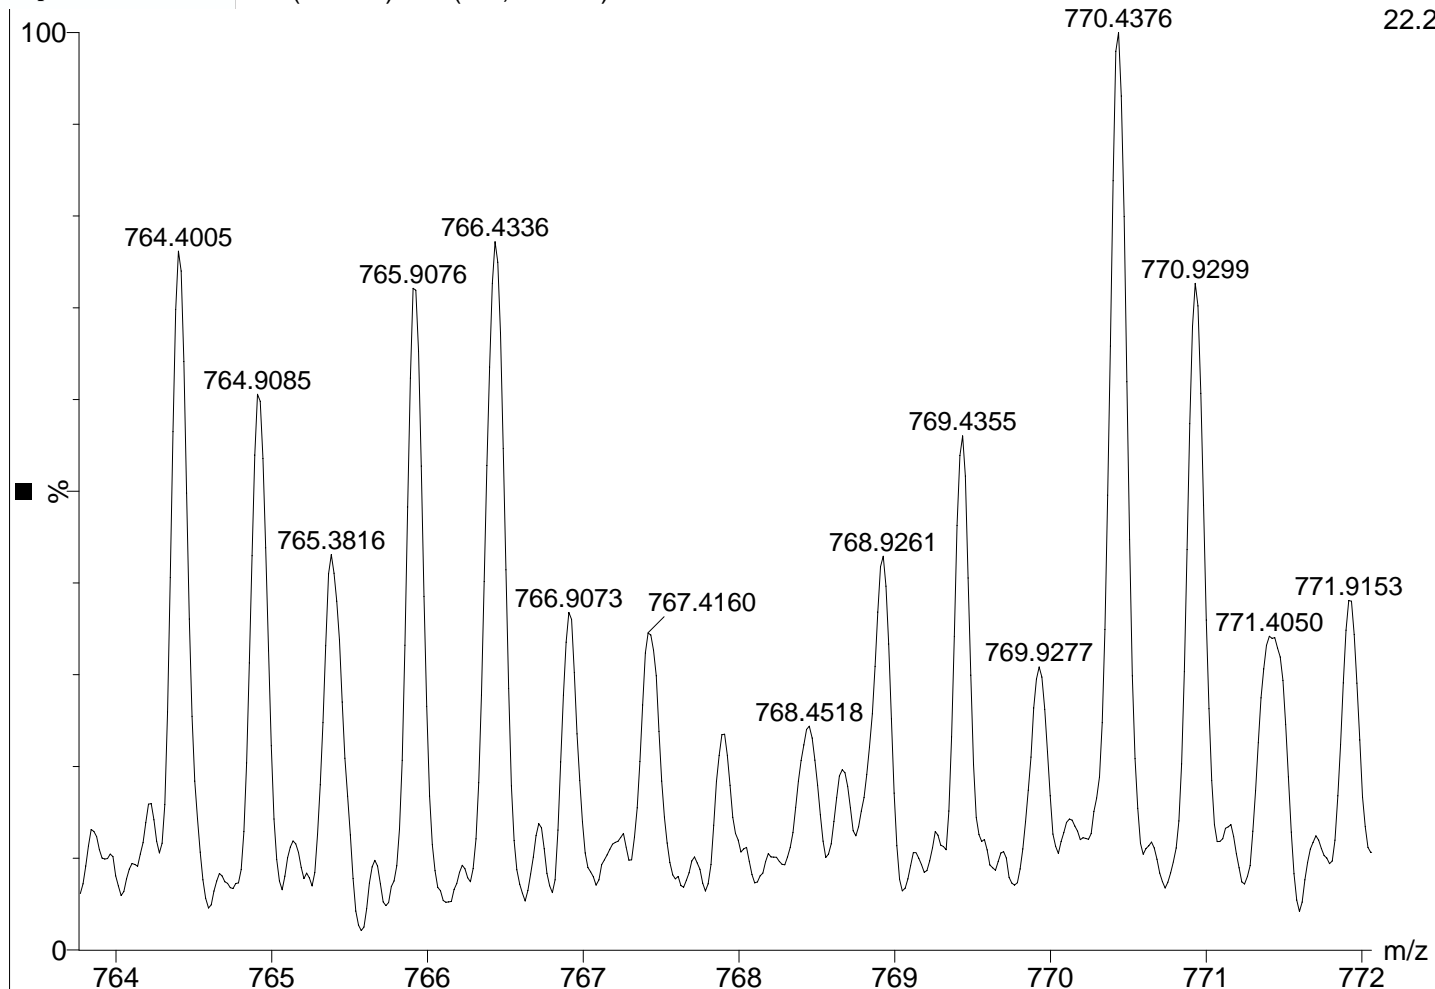

# Mascot Search Results

## Peptide View

### Peptide 11

MS/MS Fragmentation of **SILLNPGPRHILA**

Found in **KCNT1\_HUMAN**, Potassium channel subfamily T member 1 OS=Homo sapiens GN=KCNT1 PE=2 SV=2

Match to Query 403: 1526.868628 from(764.441590,2+) intensity(3249.0000)

Title: 483: Sum of 2 scans in range 1059 (rt=1092.04, f=2, i=154) to 1060 (rt=1093.06, f=3, i=98) [C:\Users\synapt\Desktop\28062011 raw\290611 Leandro E1.raw]

Data file 290611 Chris E1.mgf

Click mouse within plot area to zoom in by factor of two about that point

Or,  to  Da

Label all possible matches  Label matches used for scoring

**Monoisotopic mass of neutral peptide Mr(calc):** 1526.9297

**Variable modifications:**

**N-term :** GIST-Quat (N-term), with neutral loss 59.0735

**Ions Score:** 18 **Expect:** 9.8e+002

**Matches :** 7/104 fragment ions using 14 most intense peaks ([help](#))

| # | b               | b <sup>++</sup> | b <sup>*</sup> | b <sup>***</sup> | b <sup>0</sup> | b <sup>0++</sup> | Seq. | y         | y <sup>++</sup> | y <sup>*</sup> | y <sup>***</sup> | #  |
|---|-----------------|-----------------|----------------|------------------|----------------|------------------|------|-----------|-----------------|----------------|------------------|----|
| 1 | 156.0655        | 78.5364         |                |                  | 138.0550       | 69.5311          | S    |           |                 |                |                  | 13 |
| 2 | <b>269.1496</b> | 135.0784        |                |                  | 251.1390       | 126.0731         | I    | 1313.8052 | 657.4062        | 1296.7787      | 648.8930         | 12 |
| 3 | 382.2336        | 191.6205        |                |                  | 364.2231       | 182.6152         | L    | 1200.7212 | 600.8642        | 1183.6946      | 592.3509         | 11 |
| 4 | 495.3177        | 248.1625        |                |                  | 477.3071       | 239.1572         | L    | 1087.6371 | 544.3222        | 1070.6105      | 535.8089         | 10 |

|    |                  |          |           |          |           |          |   |                 |          |          |          |   |
|----|------------------|----------|-----------|----------|-----------|----------|---|-----------------|----------|----------|----------|---|
| 5  | <b>609.3606</b>  | 305.1840 | 592.3341  | 296.6707 | 591.3501  | 296.1787 | N | 974.5530        | 487.7802 | 957.5265 | 479.2669 | 9 |
| 6  | 706.4134         | 353.7103 | 689.3869  | 345.1971 | 688.4028  | 344.7051 | P | <b>860.5101</b> | 430.7587 | 843.4835 | 422.2454 | 8 |
| 7  | 763.4349         | 382.2211 | 746.4083  | 373.7078 | 745.4243  | 373.2158 | G | 763.4573        | 382.2323 | 746.4308 | 373.7190 | 7 |
| 8  | <b>860.4876</b>  | 430.7475 | 843.4611  | 422.2342 | 842.4771  | 421.7422 | P | 706.4359        | 353.7216 | 689.4093 | 345.2083 | 6 |
| 9  | 1016.5887        | 508.7980 | 999.5622  | 500.2847 | 998.5782  | 499.7927 | R | <b>609.3831</b> | 305.1952 | 592.3566 | 296.6819 | 5 |
| 10 | 1153.6477        | 577.3275 | 1136.6211 | 568.8142 | 1135.6371 | 568.3222 | H | 453.2820        | 227.1446 |          |          | 4 |
| 11 | <b>1266.7317</b> | 633.8695 | 1249.7052 | 625.3562 | 1248.7212 | 624.8642 | I | 316.2231        | 158.6152 |          |          | 3 |
| 12 | <b>1379.8158</b> | 690.4115 | 1362.7892 | 681.8983 | 1361.8052 | 681.4062 | L | 203.1390        | 102.0731 |          |          | 2 |
| 13 |                  |          |           |          |           |          | A | 90.0550         | 45.5311  |          |          | 1 |

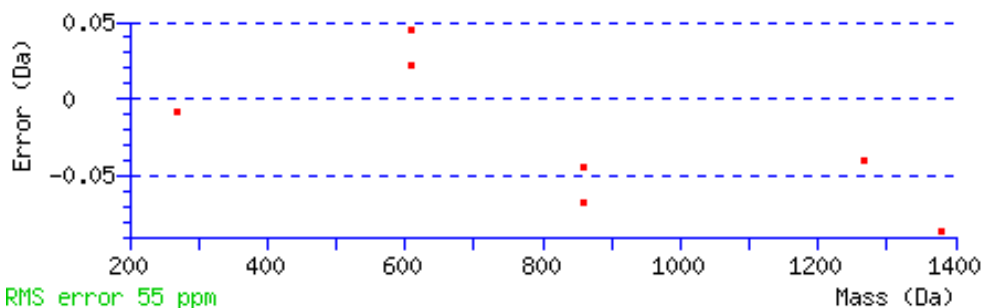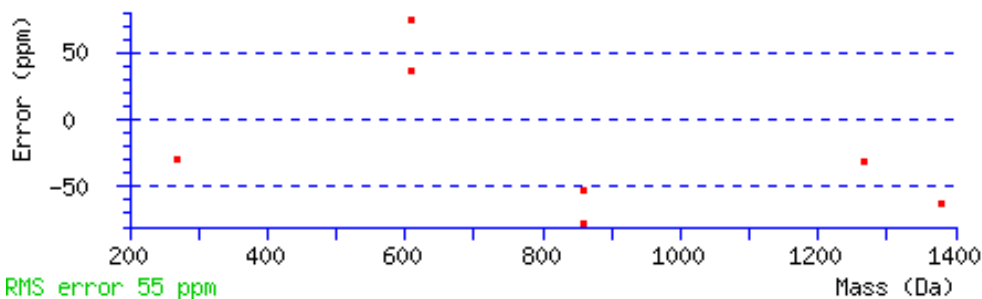

NCBI **BLAST** search of [SILLNPGPRHILA](#)

(Parameters: blastp, nr protein database, expect=20000, no filter, PAM30)

Other BLAST [web gateways](#)

All matches to this query

| Score | Mr(calc): | Delta   | Sequence                       |
|-------|-----------|---------|--------------------------------|
| 17.6  | 1526.9297 | -0.0610 | <a href="#">SILLNPGPRHILA</a>  |
| 15.6  | 1526.8854 | -0.0168 | <a href="#">SLALRCAQELLA</a>   |
| 14.8  | 1526.8529 | 0.0158  | <a href="#">LKGDRGATGERGLA</a> |
| 14.4  | 1526.8820 | -0.0134 | <a href="#">ALFEGKGAAPQIAK</a> |
| 13.9  | 1526.8894 | -0.0208 | <a href="#">GAIGCTPLFIPKLA</a> |
| 12.9  | 1526.8933 | -0.0246 | <a href="#">EAIRAIFPSRGLA</a>  |
| 11.1  | 1526.8742 | -0.0056 | <a href="#">TVPPDTSKMLKLA</a>  |
| 11.0  | 1526.9495 | -0.0809 | <a href="#">EAMVKASPKTSL</a>   |

|      |           |         |                               |
|------|-----------|---------|-------------------------------|
| 11.0 | 1526.9495 | -0.0809 | <a href="#">EAMVKASPKTSL</a>  |
| 10.9 | 1526.8055 | 0.0632  | <a href="#">LSFLDLCFTASIA</a> |

**Mascot:** <http://www.matrixscience.com/>

Peptide 12 – Run 1 894 (24.227) Sm (SG, 2x4.00)

1: TOF MS ES+  
36.1

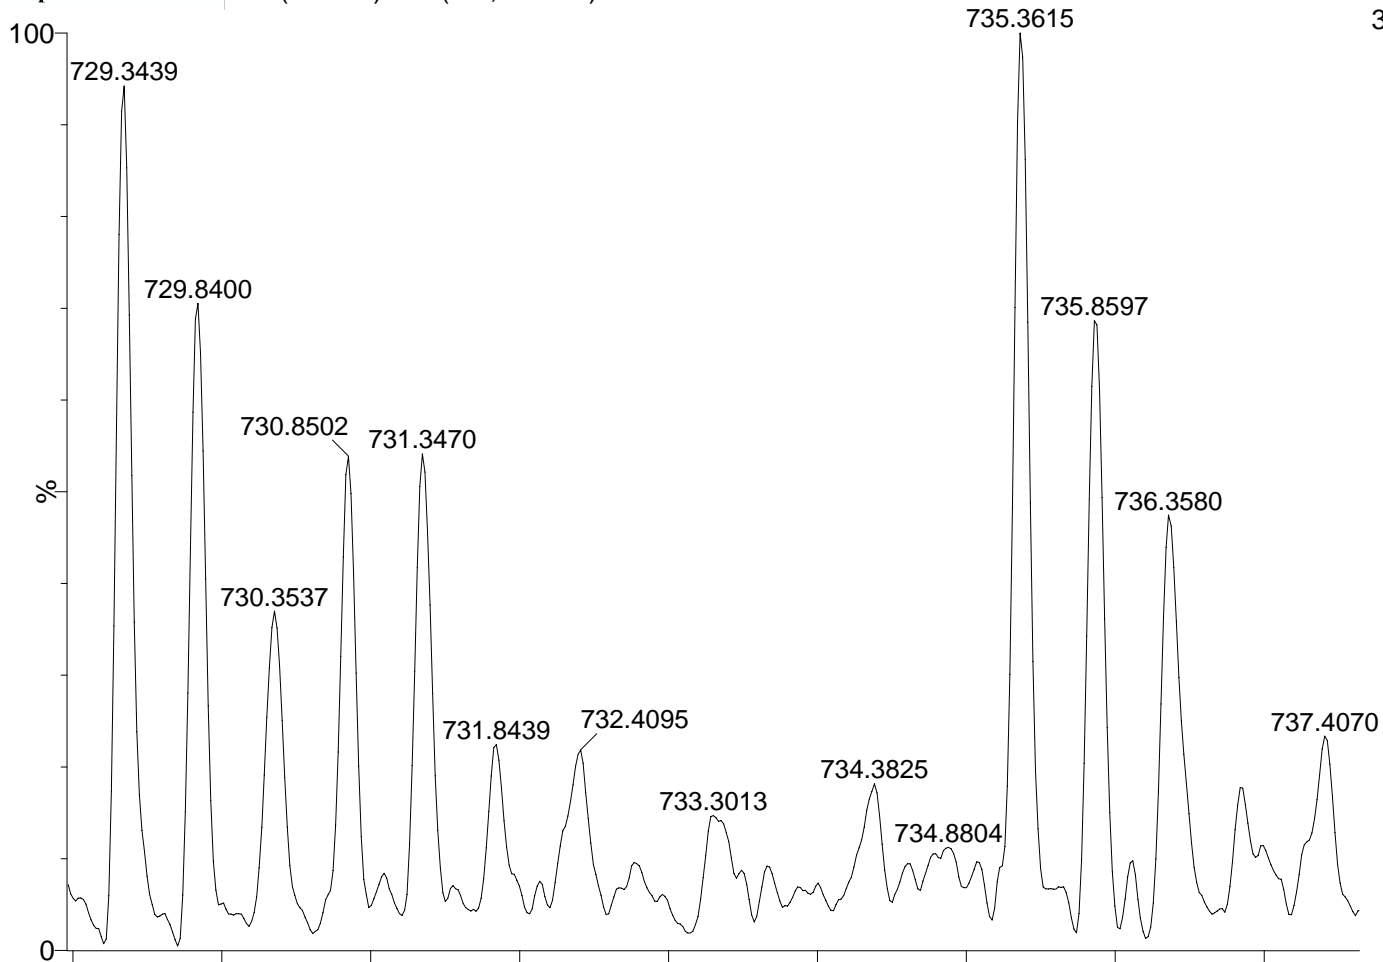

Peptide 12 – Run 2 1152 (24.639) Sm (SG, 2x4.00)

1: TOF MS ES+  
64.1

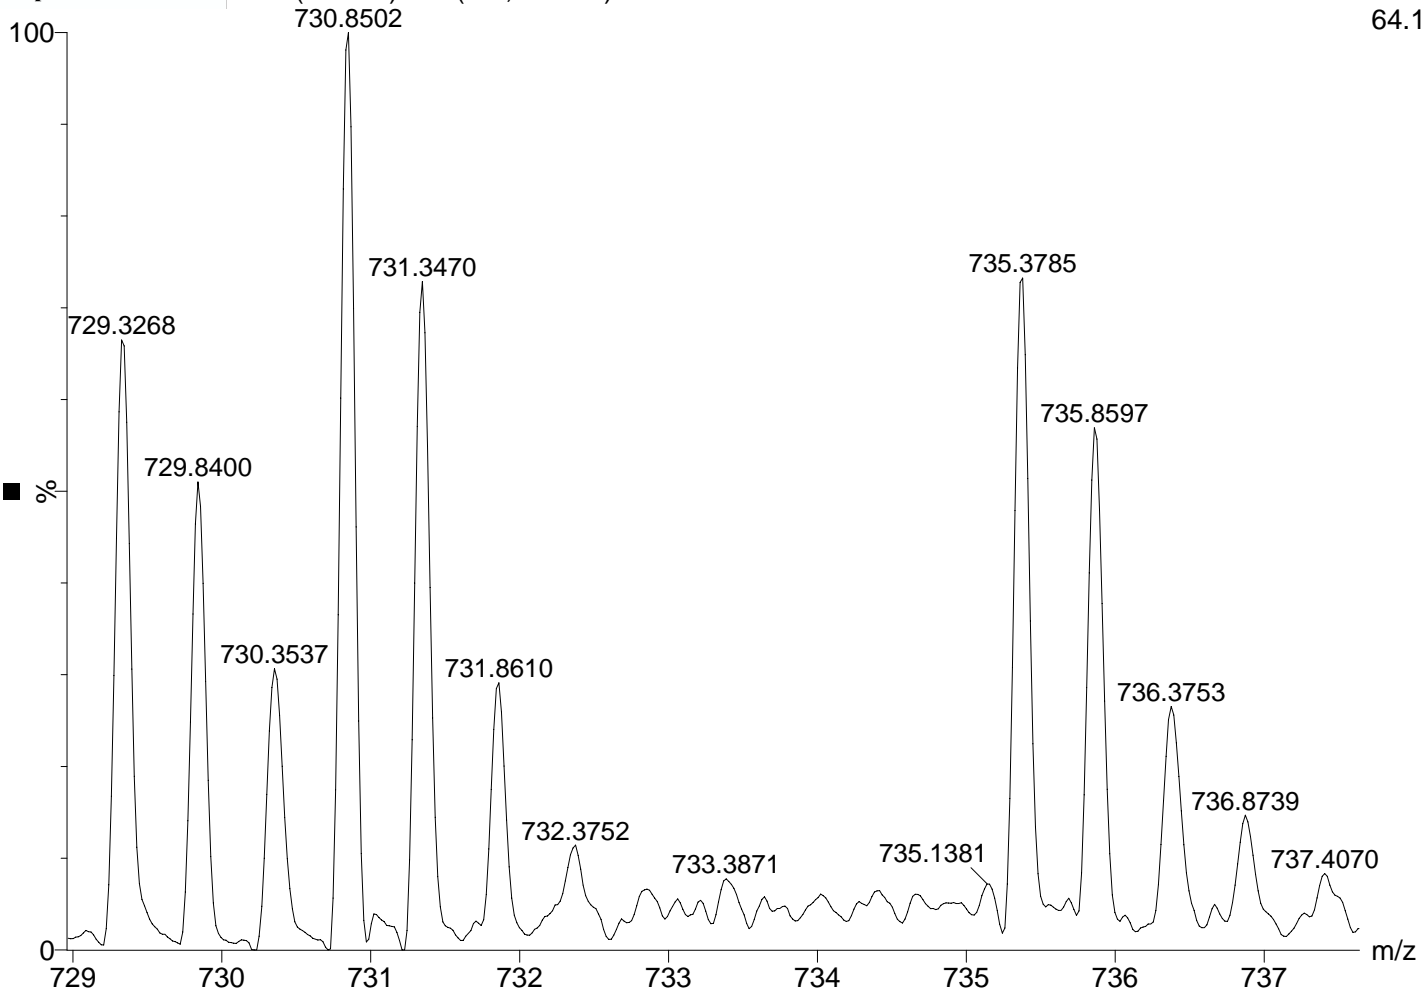

# Mascot Search Results

## Peptide View

### Peptide 12

MS/MS Fragmentation of **DPFNPFELTNH**

Found in **CATC\_HUMAN**, Dipeptidyl peptidase 1 OS=Homo sapiens GN=CTSC PE=1 SV=1

Match to Query 356: 1456.728968 from(729.371760,2+) intensity(1411.0000)

Title: 629: Scan 1409 (rt=1452.59, f=4, i=85) [C:\Users\syntax\Desktop\28062011 raw\290611 Leandro E1.raw]

Data file 290611 Chris E1.mgf

Click mouse within plot area to zoom in by factor of two about that point

Or,  to  Da  
 Label all possible matches      Label matches used for scoring

**Monoisotopic mass of neutral peptide Mr(calc):** 1456.6987

**Variable modifications:**

**N-term :** GIST-Quat (N-term), with neutral loss 59.0735

**Ions Score:** 17    **Expect:** 7.6e+002

**Matches :** 10/108 fragment ions using 26 most intense peaks    ([help](#))

| #  | b                | b <sup>++</sup> | b <sup>*</sup> | b <sup>*++</sup> | b <sup>0</sup> | b <sup>0++</sup> | Seq. | y                | y <sup>++</sup> | y <sup>*</sup>  | y <sup>*++</sup> | y <sup>0</sup> | y <sup>0++</sup> | #  |
|----|------------------|-----------------|----------------|------------------|----------------|------------------|------|------------------|-----------------|-----------------|------------------|----------------|------------------|----|
| 1  | 184.0604         | 92.5339         |                |                  | 166.0499       | 83.5286          | D    |                  |                 |                 |                  |                |                  | 11 |
| 2  | <b>281.1132</b>  | 141.0602        |                |                  | 263.1026       | 132.0550         | P    | 1215.5793        | 608.2933        | 1198.5527       | 599.7800         | 1197.5687      | 599.2880         | 10 |
| 3  | <b>428.1816</b>  | 214.5944        |                |                  | 410.1710       | 205.5892         | F    | <b>1118.5265</b> | 559.7669        | 1101.5000       | 551.2536         | 1100.5160      | 550.7616         | 9  |
| 4  | <b>542.2245</b>  | 271.6159        | 525.1980       | 263.1026         | 524.2140       | 262.6106         | N    | 971.4581         | 486.2327        | 954.4316        | 477.7194         | 953.4476       | 477.2274         | 8  |
| 5  | 639.2773         | 320.1423        | 622.2508       | 311.6290         | 621.2667       | 311.1370         | P    | <b>857.4152</b>  | 429.2112        | 840.3886        | 420.6980         | 839.4046       | 420.2060         | 7  |
| 6  | <b>786.3457</b>  | 393.6765        | 769.3192       | 385.1632         | 768.3352       | 384.6712         | F    | 760.3624         | 380.6849        | 743.3359        | 372.1716         | 742.3519       | 371.6796         | 6  |
| 7  | 915.3883         | 458.1978        | 898.3618       | 449.6845         | 897.3777       | 449.1925         | E    | 613.2940         | 307.1506        | 596.2675        | 298.6374         | 595.2835       | 298.1454         | 5  |
| 8  | <b>1028.4724</b> | 514.7398        | 1011.4458      | 506.2266         | 1010.4618      | 505.7345         | L    | 484.2514         | 242.6293        | 467.2249        | 234.1161         | 466.2409       | 233.6241         | 4  |
| 9  | 1129.5201        | 565.2637        | 1112.4935      | 556.7504         | 1111.5095      | 556.2584         | T    | 371.1674         | 186.0873        | <b>354.1408</b> | 177.5740         | 353.1568       | 177.0820         | 3  |
| 10 | 1243.5630        | 622.2851        | 1226.5364      | 613.7719         | 1225.5524      | 613.2798         | N    | 270.1197         | 135.5635        | <b>253.0931</b> | 127.0502         |                |                  | 2  |
| 11 |                  |                 |                |                  |                |                  | H    | <b>156.0768</b>  | 78.5420         |                 |                  |                |                  | 1  |

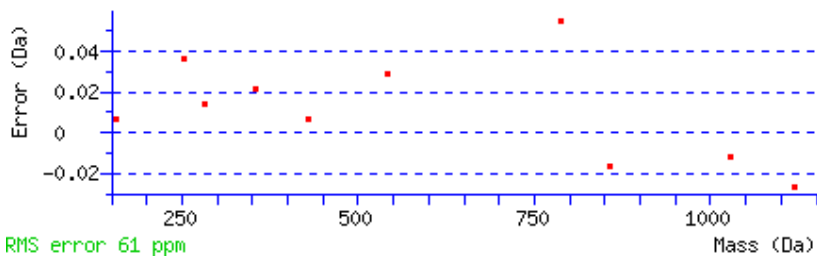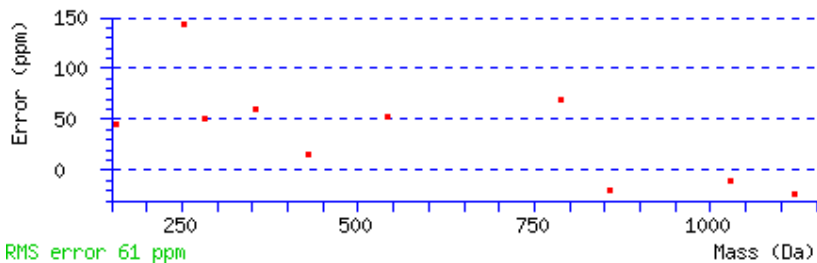

NCBI **BLAST** search of [DPFNPFELTNH](#)

(Parameters: blastp, nr protein database, expect=20000, no filter, PAM30)

Other BLAST [web gateways](#)

**All matches to this query**

| Score | Mr(calc): | Delta   | Sequence                       |
|-------|-----------|---------|--------------------------------|
| 18.4  | 1456.8594 | -0.1304 | <a href="#">SPGKGPPPAVAPRP</a> |
| 17.3  | 1456.6987 | 0.0303  | <a href="#">DPFNPFELTNH</a>    |
| 11.3  | 1456.8348 | -0.1059 | <a href="#">SPLHTPRASPTGT</a>  |
| 11.2  | 1456.7866 | -0.0576 | <a href="#">GTALKANPFGGASH</a> |
| 11.1  | 1456.7926 | -0.0636 | <a href="#">KNPPSPAPEPTV</a>   |
| 10.9  | 1456.8110 | -0.0820 | <a href="#">SSALDRIRERQ</a>    |
| 10.9  | 1456.7946 | -0.0656 | <a href="#">LVFNPM SQDLSA</a>  |
| 10.8  | 1456.7926 | -0.0636 | <a href="#">KPFTAITVTTDH</a>   |
| 10.2  | 1456.7404 | -0.0115 | <a href="#">SPAFAMSPVPGSAC</a> |
| 9.8   | 1456.8514 | -0.1224 | <a href="#">IITYIRRN PQAL</a>  |

Mascot: <http://www.matrixscience.com/>



Peptide 13 – Run 1 515 (10.869) Sm (SG, 2x4.00)

1: TOF MS ES+ 150

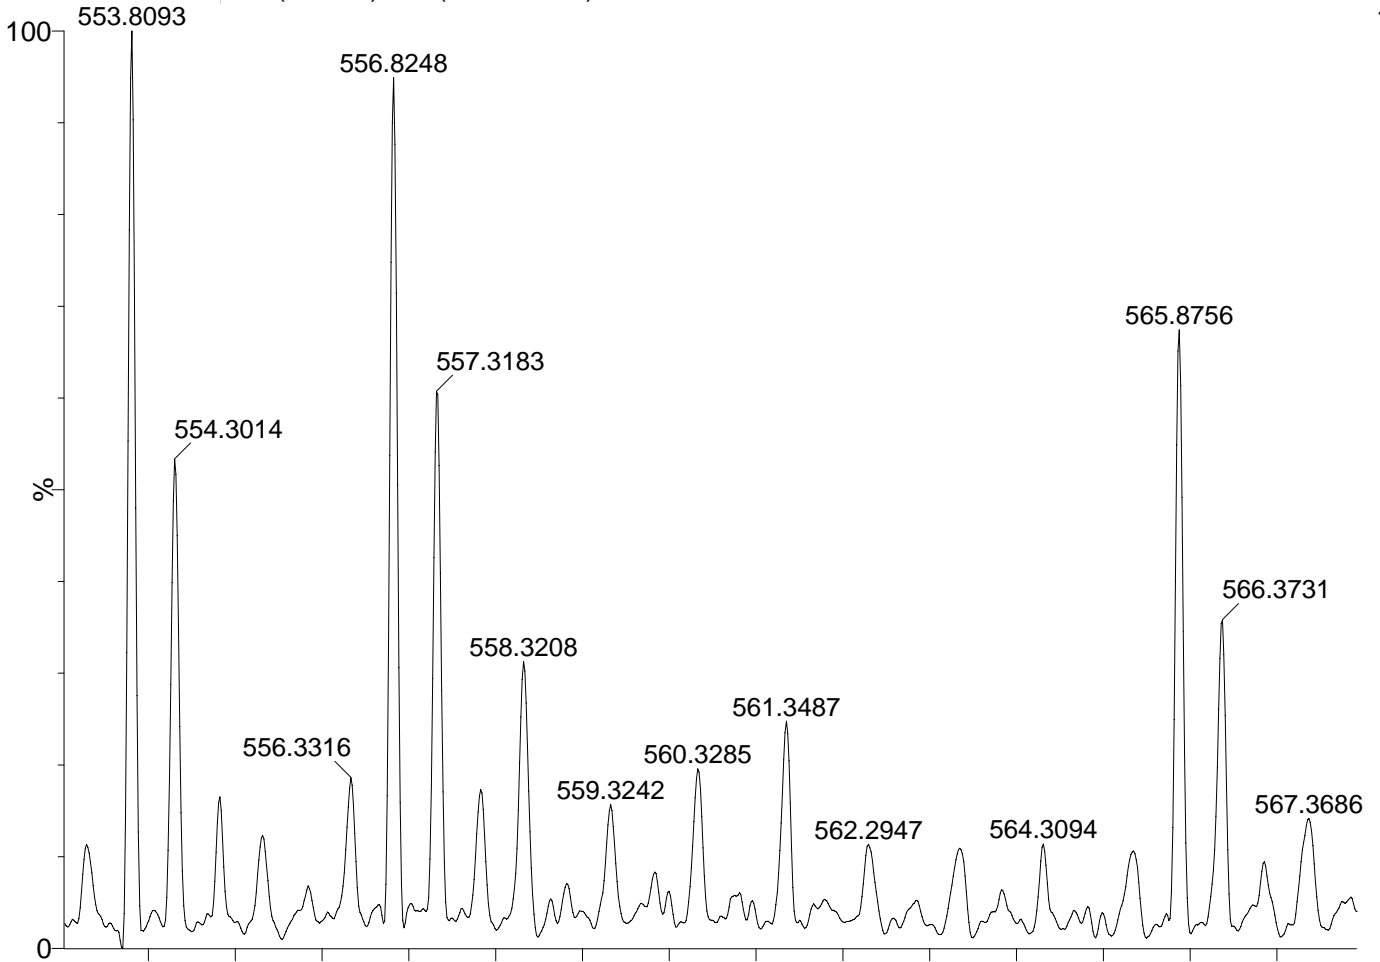

Peptide 13 – Run 2 625 (11.899) Sm (SG, 2x4.00)

1: TOF MS ES+ 106

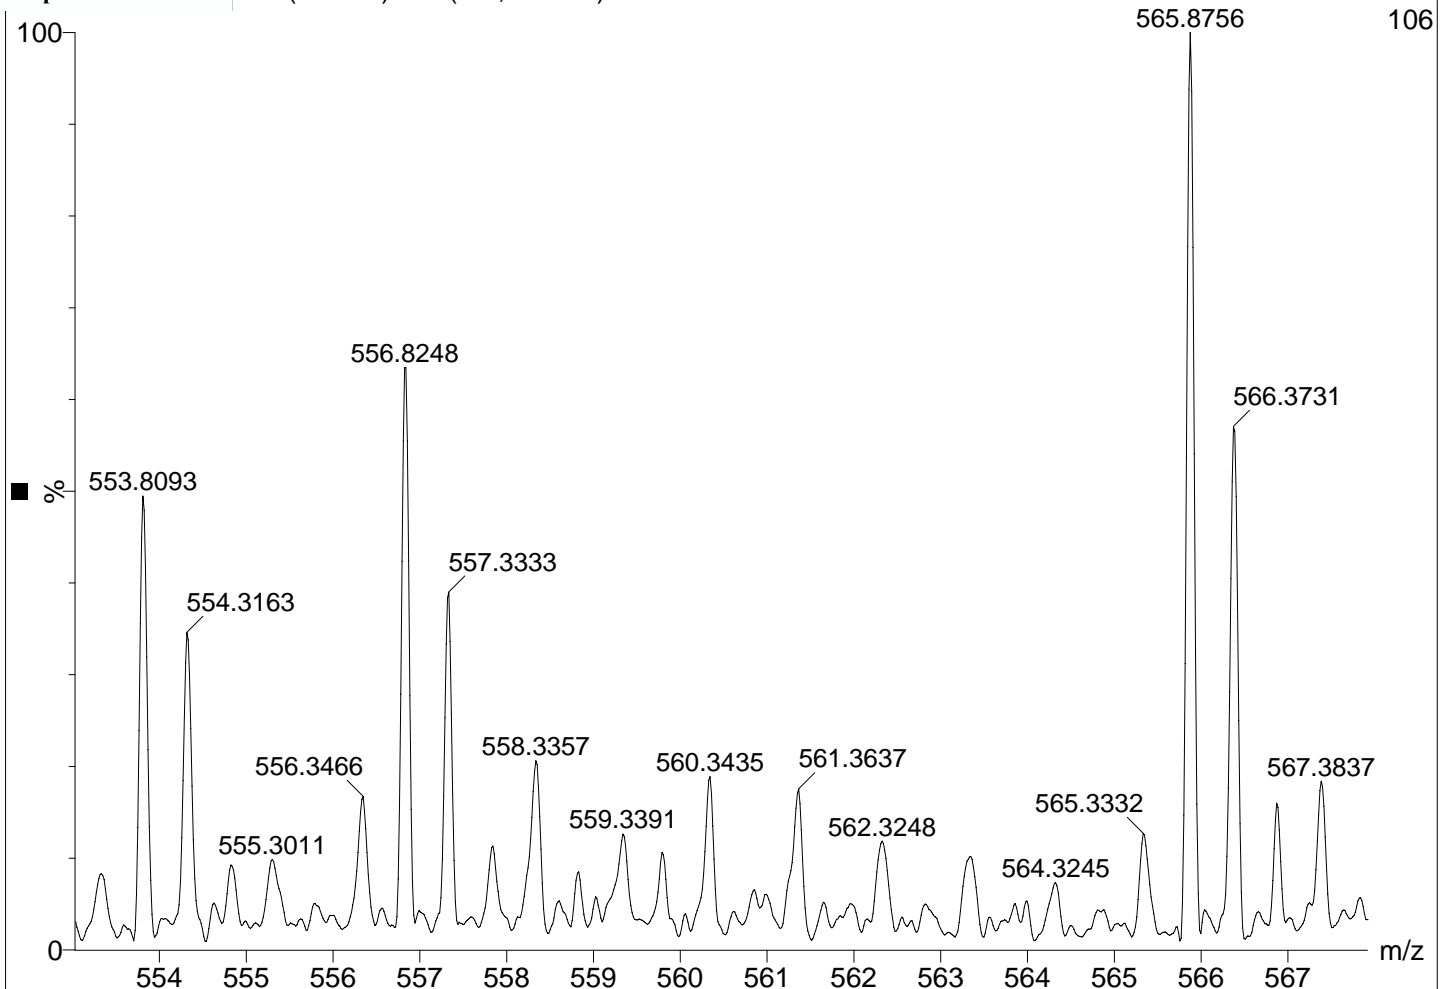

# Mascot Search Results

## Peptide View

### Peptide 13

MS/MS Fragmentation of **LTKGGYTL**

Found in **HEMO\_HUMAN**, Hemopexin OS=Homo sapiens GN=HPX PE=1 SV=2

Match to Query 159: 1105.652068 from(553.833310,2+) intensity(2083.0000)

Title: 135: Scan 629 (rt=649.041, f=2, i=46) [C:\Users\synapt\Desktop\28062011 raw\290611 Leandro E1.raw]

Data file 290611 Chris E1.mgf

Click mouse within plot area to zoom in by factor of two about that point

Or,  to  Da  
 Label all possible matches  Label matches used for scoring

**Monoisotopic mass of neutral peptide Mr(calc):** 1105.6747

**Variable modifications:**

**N-term** : GIST-Quat (N-term), with neutral loss 59.0735

**K3** : GIST-Quat (K), with neutral loss 59.0735

**Ions Score:** 25 **Expect:** 1.4e+002

**Matches** : 6/66 fragment ions using 10 most intense peaks ([help](#))

| # | b               | b <sup>++</sup> | b <sup>*</sup> | b <sup>+++</sup> | b <sup>0</sup> | b <sup>0++</sup> | Seq. | y               | y <sup>++</sup> | y <sup>*</sup> | y <sup>+++</sup> | y <sup>0</sup> | y <sup>0++</sup> | # |
|---|-----------------|-----------------|----------------|------------------|----------------|------------------|------|-----------------|-----------------|----------------|------------------|----------------|------------------|---|
| 1 | <b>182.1176</b> | 91.5624         |                |                  |                |                  | L    |                 |                 |                |                  |                |                  | 8 |
| 2 | <b>283.1652</b> | 142.0863        |                |                  | 265.1547       | 133.0810         | T    | 807.4247        | 404.2160        | 790.3981       | 395.7027         | 789.4141       | <b>395.2107</b>  | 7 |
| 3 | <b>479.2864</b> | 240.1468        | 462.2599       | 231.6336         | 461.2758       | 231.1416         | K    | <b>706.3770</b> | 353.6921        | 689.3505       | 345.1789         | 688.3665       | 344.6869         | 6 |
| 4 | 536.3079        | 268.6576        | 519.2813       | 260.1443         | 518.2973       | 259.6523         | G    | 510.2558        | 255.6316        |                |                  | 492.2453       | 246.6263         | 5 |
| 5 | <b>593.3293</b> | 297.1683        | 576.3028       | 288.6550         | 575.3188       | 288.1630         | G    | 453.2344        | 227.1208        |                |                  | 435.2238       | 218.1155         | 4 |
| 6 | 756.3927        | 378.7000        | 739.3661       | 370.1867         | 738.3821       | 369.6947         | Y    | 396.2129        | 198.6101        |                |                  | 378.2023       | 189.6048         | 3 |
| 7 | 857.4403        | 429.2238        | 840.4138       | 420.7105         | 839.4298       | 420.2185         | T    | 233.1496        | 117.0784        |                |                  | 215.1390       | 108.0731         | 2 |
| 8 |                 |                 |                |                  |                |                  | L    | 132.1019        | 66.5546         |                |                  |                |                  | 1 |

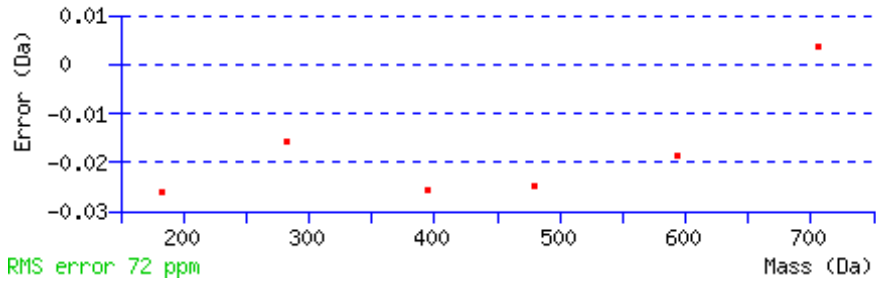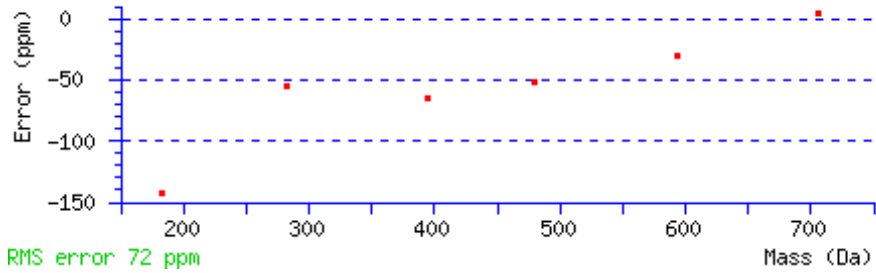

NCBI **BLAST** search of [LTKGGYTL](#)

(Parameters: blastp, nr protein database, expect=20000, no filter, PAM30)

Other BLAST [web gateways](#)

**All matches to this query**

| Score | Mr(calc): | Delta   | Sequence                 |
|-------|-----------|---------|--------------------------|
| 31.6  | 1105.6938 | -0.0418 | <a href="#">IKPLNKTY</a> |
| 31.6  | 1105.8148 | -0.1628 | <a href="#">ITKNIK</a>   |
| 31.6  | 1105.8148 | -0.1628 | <a href="#">ITKNIK</a>   |
| 31.6  | 1105.8148 | -0.1628 | <a href="#">ITKNIK</a>   |
| 31.6  | 1105.8148 | -0.1628 | <a href="#">ITKNIK</a>   |
| 31.6  | 1105.6939 | -0.0418 | <a href="#">ITKNLGFG</a> |
| 31.6  | 1105.6939 | -0.0418 | <a href="#">ITKNLGFG</a> |
| 24.9  | 1105.6747 | -0.0226 | <a href="#">LTKGGYTL</a> |
| 23.5  | 1105.6383 | 0.0138  | <a href="#">PDTKKTY</a>  |
| 23.5  | 1105.7136 | -0.0616 | <a href="#">TTNLKTY</a>  |

**Mascot:** <http://www.matrixscience.com/>

Peptide 14 – Run 1 784 (20.104) Sm (SG, 2x4.00)

1: TOF MS ES+  
24.4

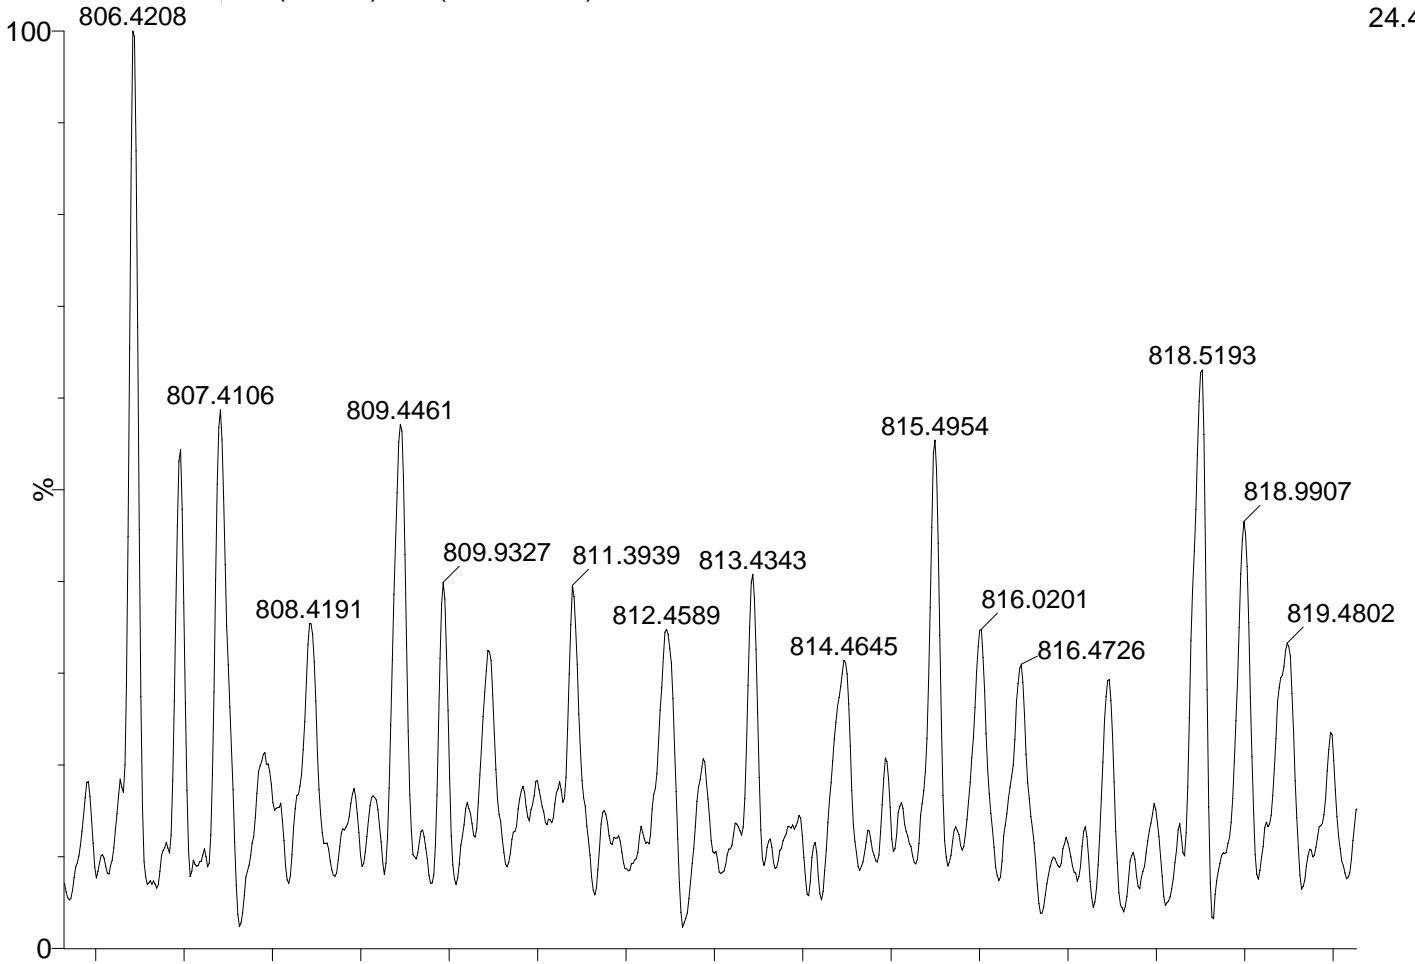

Peptide 14 – Run 2 980 (20.673) Sm (SG, 2x4.00)

1: TOF MS ES+  
16.6

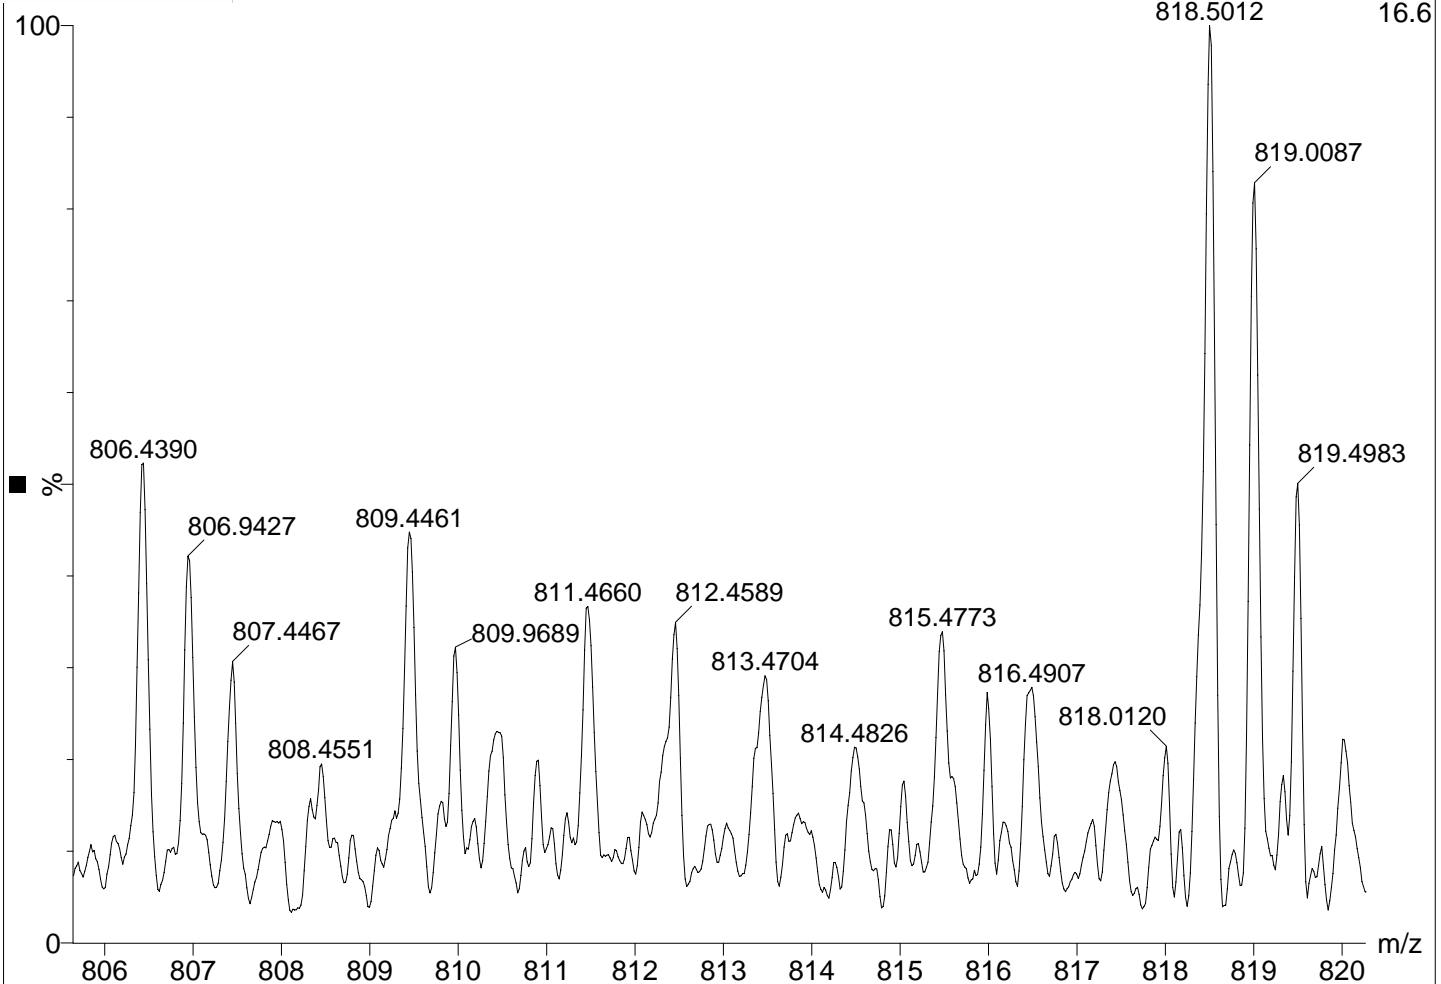

# Mascot Search Results

## Peptide View

### Peptide 14

MS/MS Fragmentation of **GISTPEELGLDKV**

Found in **COX5A\_HUMAN**, Cytochrome c oxidase subunit 5A, mitochondrial OS=Homo sapiens GN=COX5A PE=1 SV=2

Match to Query 430: 1610.922688 from(806.468620,2+) intensity(2100.0000)

Title: 527: Sum of 2 scans in range 1171 (rt=1207.29, f=2, i=177) to 1172 (rt=1208.31, f=2, i=178) [C:\Users\synapt\Desktop\28062011 raw\290611 Leandro E1.raw]

Data file 290611 Chris E1.mgf

Click mouse within plot area to zoom in by factor of two about that point

Or,  to  Da  
 Label all possible matches  Label matches used for scoring

**Monoisotopic mass of neutral peptide Mr(calc):** 1610.9131

**Variable modifications:**

**N-term** : GIST-Quat (N-term), with neutral loss 59.0735

**K12** : GIST-Quat (K), with neutral loss 59.0735

**Ions Score:** 18 **Expect:** 1e+003

**Matches** : 9/112 fragment ions using 25 most intense peaks ([help](#))

| #  | b               | b <sup>++</sup> | b <sup>*</sup> | b <sup>*++</sup> | b <sup>0</sup> | b <sup>0++</sup> | Seq. | y                | y <sup>++</sup> | y <sup>*</sup>   | y <sup>*++</sup> | y <sup>0</sup> | y <sup>0++</sup> | #  |
|----|-----------------|-----------------|----------------|------------------|----------------|------------------|------|------------------|-----------------|------------------|------------------|----------------|------------------|----|
| 1  | 126.0550        | 63.5311         |                |                  |                |                  | G    |                  |                 |                  |                  |                |                  | 13 |
| 2  | <b>239.1390</b> | 120.0731        |                |                  |                |                  | I    | 1368.7257        | 684.8665        | 1351.6991        | 676.3532         | 1350.7151      | 675.8612         | 12 |
| 3  | <b>326.1710</b> | 163.5892        |                |                  | 308.1605       | 154.5839         | S    | <b>1255.6416</b> | 628.3245        | <b>1238.6151</b> | 619.8112         | 1237.6311      | 619.3192         | 11 |
| 4  | <b>427.2187</b> | 214.1130        |                |                  | 409.2082       | 205.1077         | T    | 1168.6096        | 584.8084        | 1151.5830        | 576.2952         | 1150.5990      | 575.8032         | 10 |
| 5  | 524.2715        | 262.6394        |                |                  | 506.2609       | 253.6341         | P    | <b>1067.5619</b> | 534.2846        | 1050.5354        | 525.7713         | 1049.5514      | 525.2793         | 9  |
| 6  | <b>653.3141</b> | 327.1607        |                |                  | 635.3035       | 318.1554         | E    | 970.5092         | 485.7582        | 953.4826         | 477.2449         | 952.4986       | 476.7529         | 8  |
| 7  | 782.3567        | 391.6820        |                |                  | 764.3461       | 382.6767         | E    | 841.4666         | 421.2369        | 824.4400         | 412.7236         | 823.4560       | 412.2316         | 7  |
| 8  | 895.4407        | 448.2240        |                |                  | 877.4302       | 439.2187         | L    | 712.4240         | 356.7156        | 695.3974         | 348.2023         | 694.4134       | 347.7103         | 6  |
| 9  | 952.4622        | 476.7347        |                |                  | 934.4516       | 467.7295         | G    | <b>599.3399</b>  | 300.1736        | 582.3134         | 291.6603         | 581.3293       | 291.1683         | 5  |
| 10 | 1065.5463       | 533.2768        |                |                  | 1047.5357      | 524.2715         | L    | 542.3184         | 271.6629        | 525.2919         | 263.1496         | 524.3079       | 262.6576         | 4  |

|           |           |          |           |          |           |          |          |                 |          |          |          |          |          |          |
|-----------|-----------|----------|-----------|----------|-----------|----------|----------|-----------------|----------|----------|----------|----------|----------|----------|
| <b>11</b> | 1180.5732 | 590.7902 |           |          | 1162.5626 | 581.7850 | <b>D</b> | 429.2344        | 215.1208 | 412.2078 | 206.6076 | 411.2238 | 206.1155 | <b>3</b> |
| <b>12</b> | 1376.6944 | 688.8508 | 1359.6678 | 680.3376 | 1358.6838 | 679.8456 | <b>K</b> | <b>314.2074</b> | 157.6074 | 297.1809 | 149.0941 |          |          | <b>2</b> |
| <b>13</b> |           |          |           |          |           |          | <b>V</b> | 118.0863        | 59.5468  |          |          |          |          | <b>1</b> |

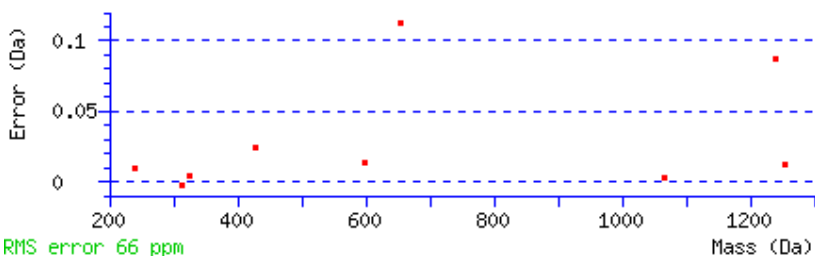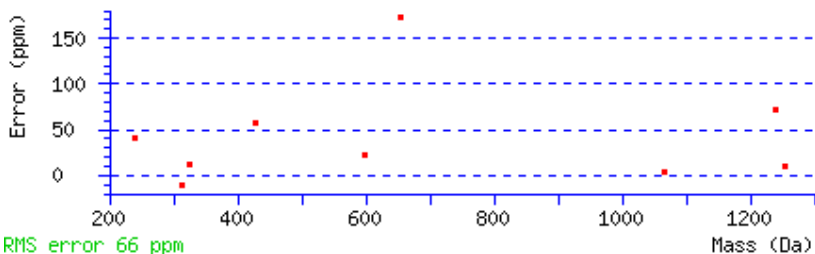

NCBI **BLAST** search of [GISTPEELGLDKV](#)

(Parameters: blastp, nr protein database, expect=20000, no filter, PAM30)

Other BLAST [web gateways](#)

**All matches to this query**

| Score | Mr(calc): | Delta   | Sequence                        |
|-------|-----------|---------|---------------------------------|
| 17.7  | 1610.9131 | 0.0096  | <a href="#">GISTPEELGLDKV</a>   |
| 12.6  | 1610.9494 | -0.0268 | <a href="#">LPESTVKVWFRN</a>    |
| 11.2  | 1610.8574 | 0.0653  | <a href="#">AADTDGRLRSGDEL</a>  |
| 10.9  | 1610.7665 | 0.1562  | <a href="#">PLDTPCGHTFCYK</a>   |
| 10.1  | 1610.8628 | 0.0599  | <a href="#">AADTKKQNADPQA</a>   |
| 9.1   | 1611.0739 | -0.1512 | <a href="#">GLAASLLFLLLK</a>    |
| 8.9   | 1610.8628 | 0.0599  | <a href="#">AADTKKQNADPQA</a>   |
| 8.9   | 1610.8338 | 0.0889  | <a href="#">AADTPGKPSASPMAG</a> |
| 8.5   | 1610.9548 | -0.0321 | <a href="#">VAWFHEKTKIV</a>     |
| 8.4   | 1611.0011 | -0.0784 | <a href="#">ISPLGILYTPALKV</a>  |

Mascot: <http://www.matrixscience.com/>

Peptide 15 – Run 1 726 (18.750) Sm (SG, 2x4.00)

1: TOF MS ES+  
25.3

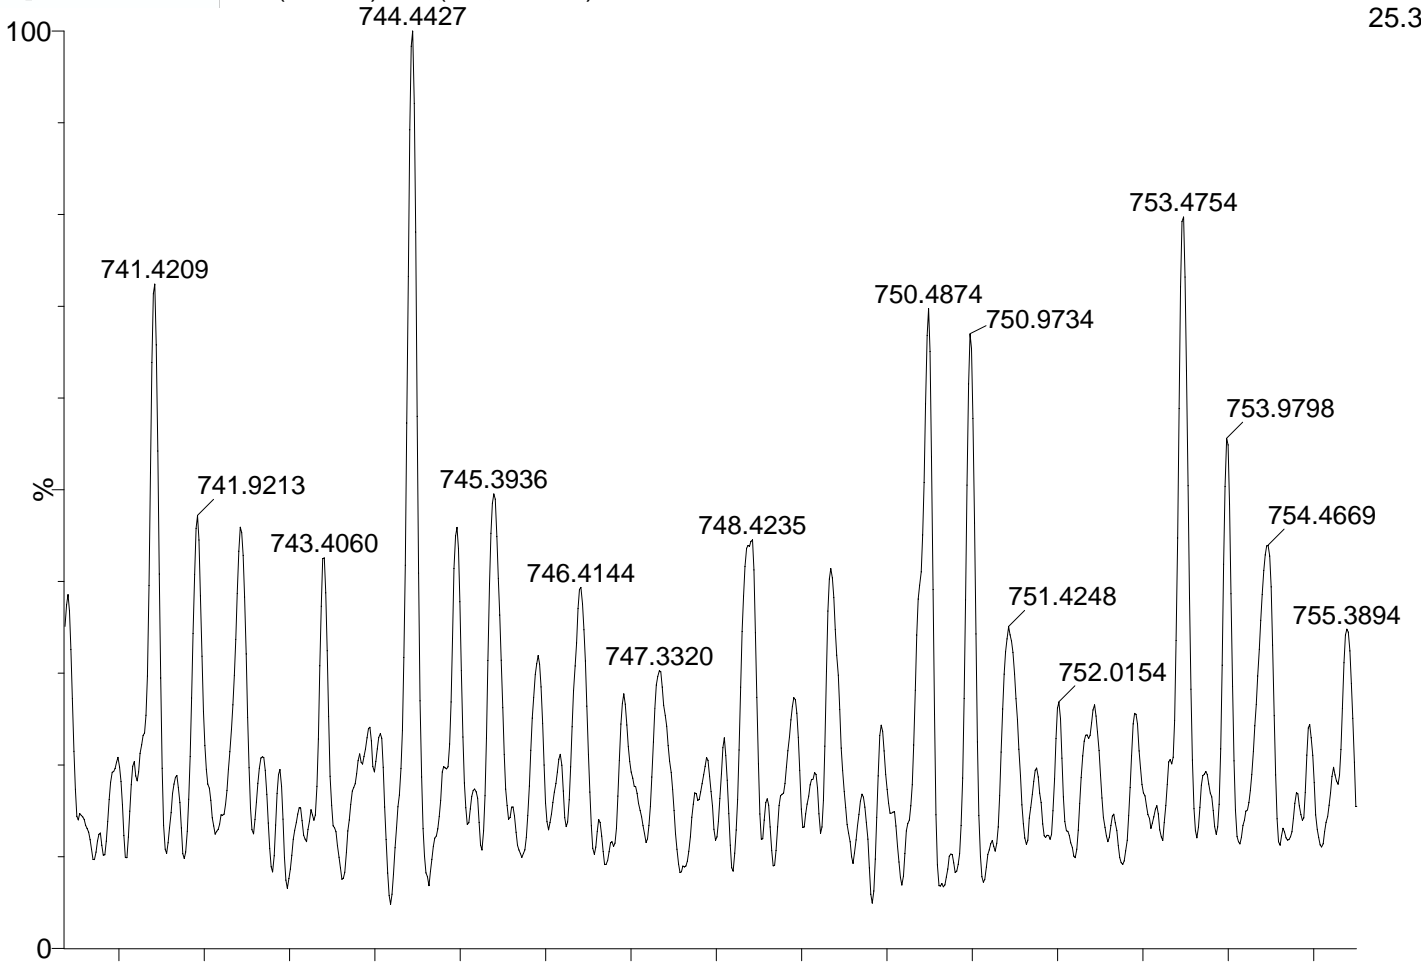

Peptide 15 – Run 2 924 (19.504) Sm (SG, 2x4.00)

1: TOF MS ES+  
12.5

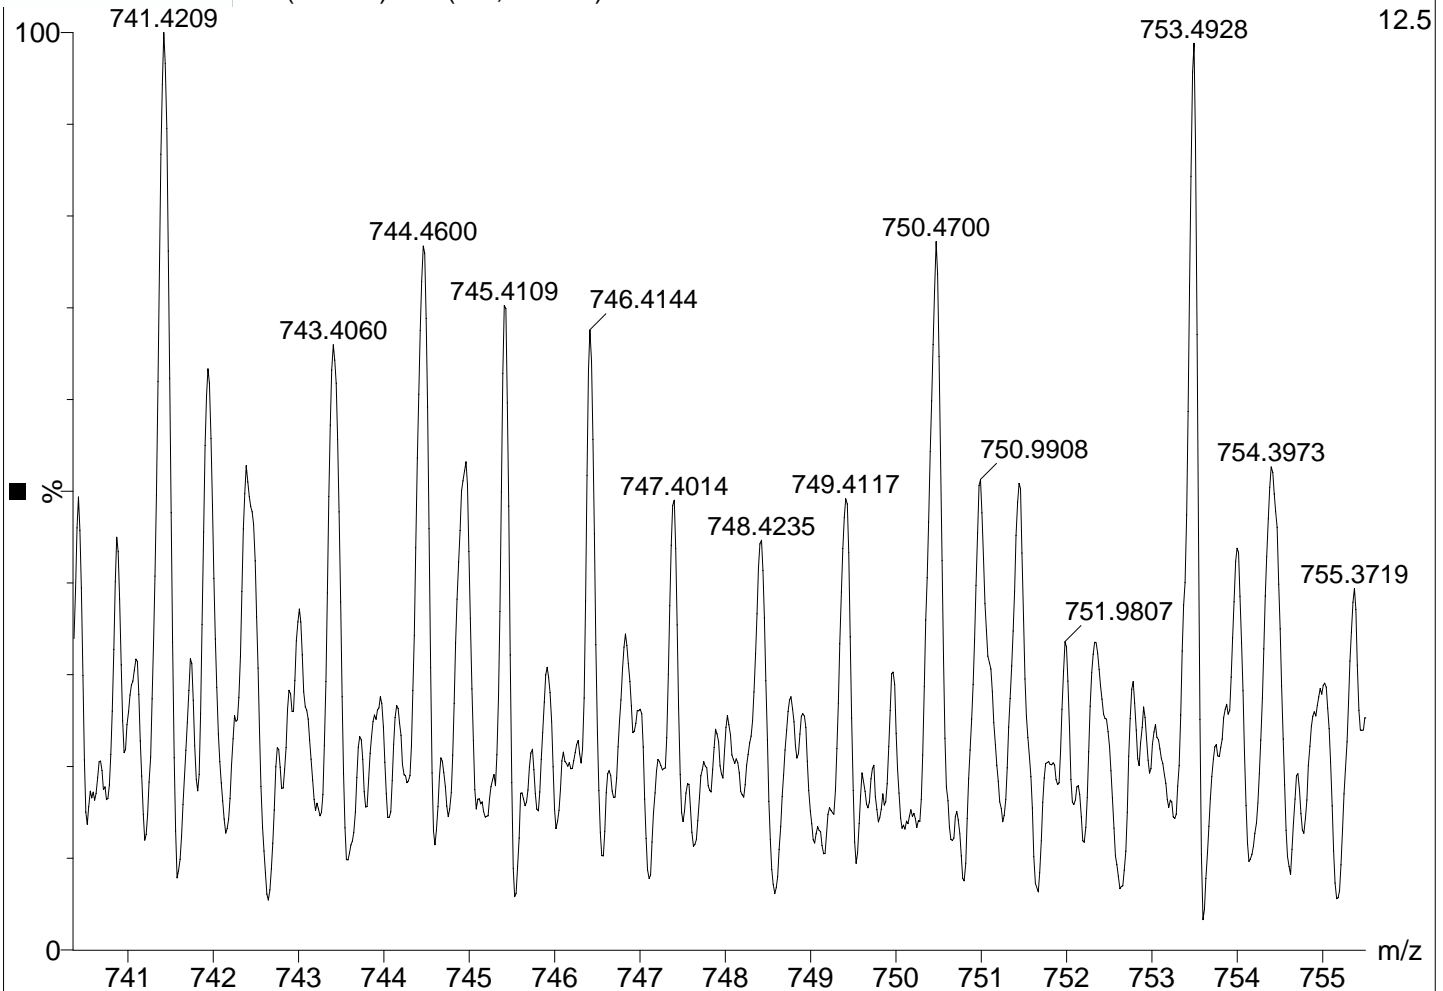

# Mascot Search Results

## Peptide View

### Peptide 15

MS/MS Fragmentation of **GGSAVISLEGKPL**

Found in **COF1\_HUMAN**, Cofilin-1 OS=Homo sapiens GN=CFL1 PE=1 SV=3

Match to Query 383: 1486.899428 from(744.456990,2+) intensity(1205.0000)

Title: 503: Scan 1090 (rt=1123.96, f=4, i=65) [C:\Users\synapt\Desktop\28062011 raw\290611 Leandro E1.raw]

Data file 290611 Chris E1.mgf

Click mouse within plot area to zoom in by factor of two about that point

Or,  to  Da  
 Label all possible matches  Label matches used for scoring

**Monoisotopic mass of neutral peptide Mr(calc):** 1486.9241

**Variable modifications:**

**N-term** : GIST-Quat:2H(3) (N-term), with neutral loss 62.0923

**K11** : GIST-Quat:2H(3) (K), with neutral loss 62.0923

**Ions Score:** 13 **Expect:** 3.1e+003

**Matches** : 6/108 fragment ions using 13 most intense peaks ([help](#))

| #  | b               | b <sup>++</sup> | b <sup>*</sup> | b <sup>*++</sup> | b <sup>0</sup> | b <sup>0++</sup> | Seq. | y               | y <sup>++</sup> | y <sup>*</sup> | y <sup>*++</sup> | y <sup>0</sup> | y <sup>0++</sup> | #  |
|----|-----------------|-----------------|----------------|------------------|----------------|------------------|------|-----------------|-----------------|----------------|------------------|----------------|------------------|----|
| 1  | 126.0550        | 63.5311         |                |                  |                |                  | G    |                 |                 |                |                  |                |                  | 13 |
| 2  | 183.0764        | 92.0418         |                |                  |                |                  | G    | 1238.6991       | 619.8532        | 1221.6725      | 611.3399         | 1220.6885      | 610.8479         | 12 |
| 3  | 270.1084        | 135.5579        |                |                  | 252.0979       | 126.5526         | S    | 1181.6776       | 591.3424        | 1164.6511      | 582.8292         | 1163.6671      | 582.3372         | 11 |
| 4  | <b>341.1456</b> | 171.0764        |                |                  | 323.1350       | 162.0711         | A    | 1094.6456       | 547.8264        | 1077.6190      | 539.3132         | 1076.6350      | 538.8211         | 10 |
| 5  | <b>440.2140</b> | 220.6106        |                |                  | 422.2034       | 211.6053         | V    | 1023.6085       | 512.3079        | 1006.5819      | 503.7946         | 1005.5979      | 503.3026         | 9  |
| 6  | <b>553.2980</b> | 277.1527        |                |                  | 535.2875       | 268.1474         | I    | <b>924.5401</b> | 462.7737        | 907.5135       | 454.2604         | 906.5295       | 453.7684         | 8  |
| 7  | 640.3301        | 320.6687        |                |                  | 622.3195       | 311.6634         | S    | <b>811.4560</b> | 406.2316        | 794.4294       | 397.7184         | 793.4454       | 397.2264         | 7  |
| 8  | 753.4141        | 377.2107        |                |                  | 735.4036       | 368.2054         | L    | 724.4240        | 362.7156        | 707.3974       | 354.2023         | 706.4134       | 353.7103         | 6  |
| 9  | 882.4567        | 441.7320        |                |                  | 864.4462       | 432.7267         | E    | 611.3399        | 306.1736        | 594.3134       | 297.6603         | 593.3293       | 297.1683         | 5  |
| 10 | 939.4782        | 470.2427        |                |                  | 921.4676       | 461.2374         | G    | 482.2973        | 241.6523        | 465.2708       | 233.1390         |                |                  | 4  |
| 11 | 1135.5994       | 568.3033        | 1118.5728      | 559.7900         | 1117.5888      | 559.2980         | K    | 425.2758        | 213.1416        | 408.2493       | 204.6283         |                |                  | 3  |



|    |           |          |           |          |           |          |   |          |          |  |  |  |  |  |   |
|----|-----------|----------|-----------|----------|-----------|----------|---|----------|----------|--|--|--|--|--|---|
| 12 | 1232.6521 | 616.8297 | 1215.6256 | 608.3164 | 1214.6416 | 607.8244 | P | 229.1547 | 115.0810 |  |  |  |  |  | 2 |
| 13 |           |          |           |          |           |          | L | 132.1019 | 66.5546  |  |  |  |  |  | 1 |

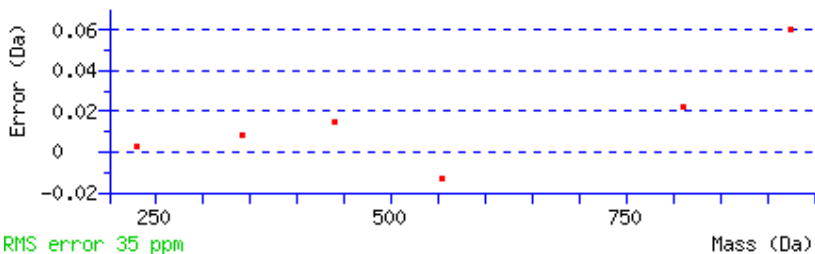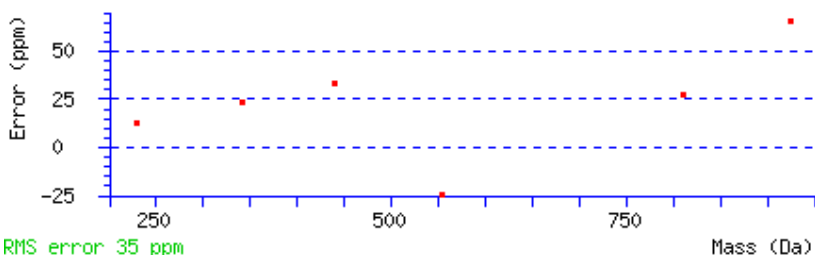

NCBI **BLAST** search of [GGSAVISLEGKPL](#)

(Parameters: blastp, nr protein database, expect=20000, no filter, PAM30)

Other BLAST [web gateways](#)

**All matches to this query**

| Score | Mr(cal):  | Delta   | Sequence                      |
|-------|-----------|---------|-------------------------------|
| 17.6  | 1486.8454 | 0.0541  | <a href="#">EVGNLDLIAHLR</a>  |
| 15.8  | 1486.9354 | -0.0359 | <a href="#">ASNVLNTKVKGP</a>  |
| 14.8  | 1486.8965 | 0.0029  | <a href="#">DIICGKLLAKMF</a>  |
| 13.2  | 1486.7402 | 0.1592  | <a href="#">LEELEEIDLSGN</a>  |
| 13.1  | 1486.9770 | -0.0775 | <a href="#">KSGVKSRIHALR</a>  |
| 13.1  | 1486.9770 | -0.0775 | <a href="#">KSGVKSRIHALR</a>  |
| 12.6  | 1486.9241 | -0.0247 | <a href="#">GGSAVISLEGKPL</a> |
| 12.6  | 1486.8566 | 0.0428  | <a href="#">EVQARDRGNPPL</a>  |
| 12.4  | 1486.8872 | 0.0122  | <a href="#">MPVLKSSLALGLE</a> |
| 12.1  | 1486.8930 | 0.0065  | <a href="#">ATARDILARLH</a>   |

Mascot: <http://www.matrixscience.com/>

Peptide 16 – Run 1 418 (7.486) Sm (SG, 2x4.00)

1: TOF MS ES+  
37.0

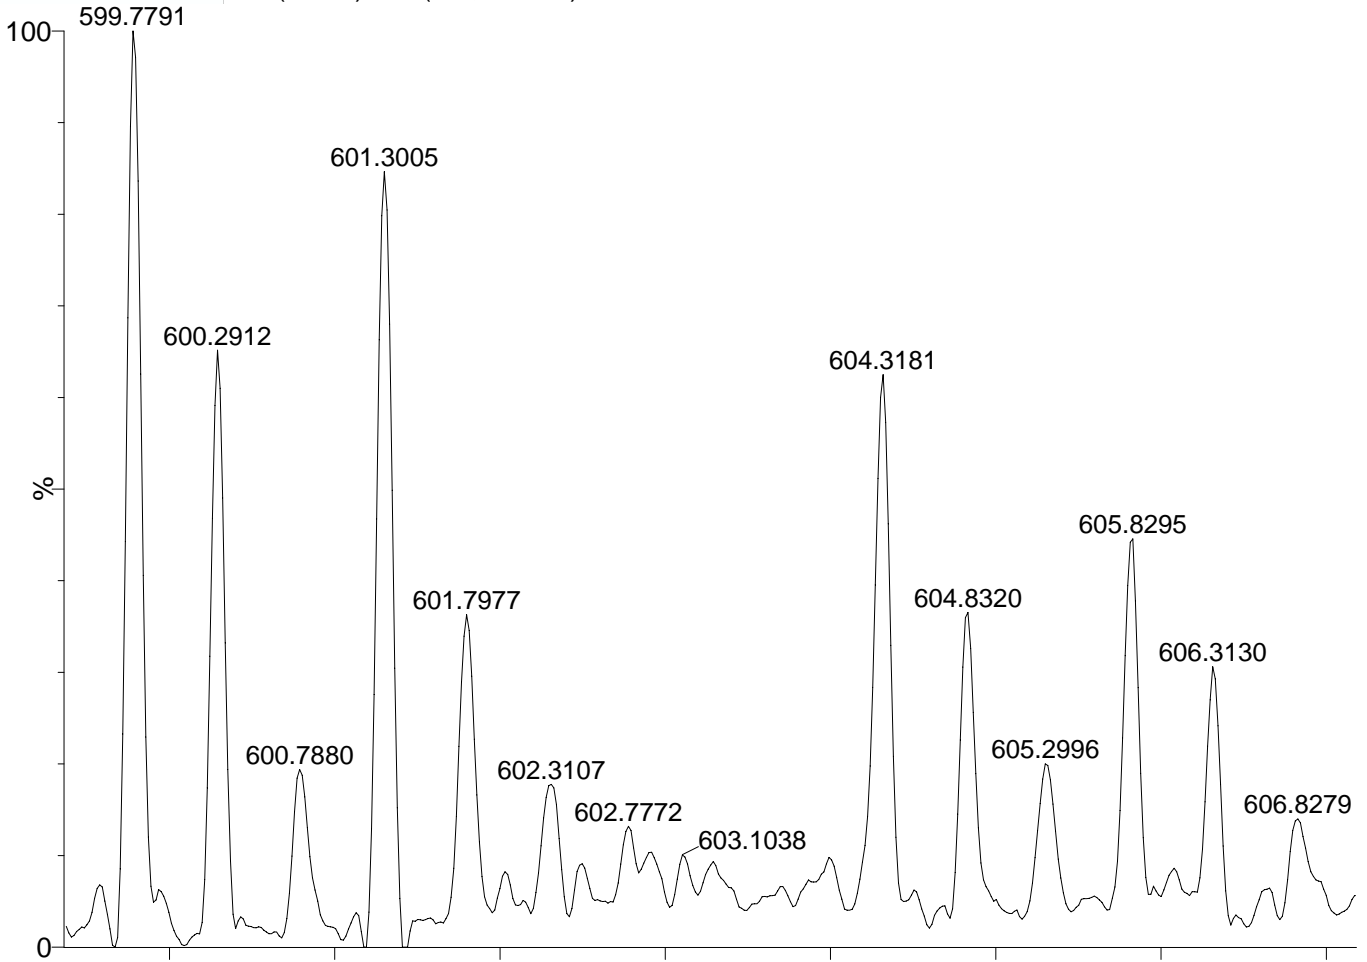

Peptide 16 – Run 2 (8.106) Sm (SG, 2x4.00)

1: TOF MS ES+  
5.70

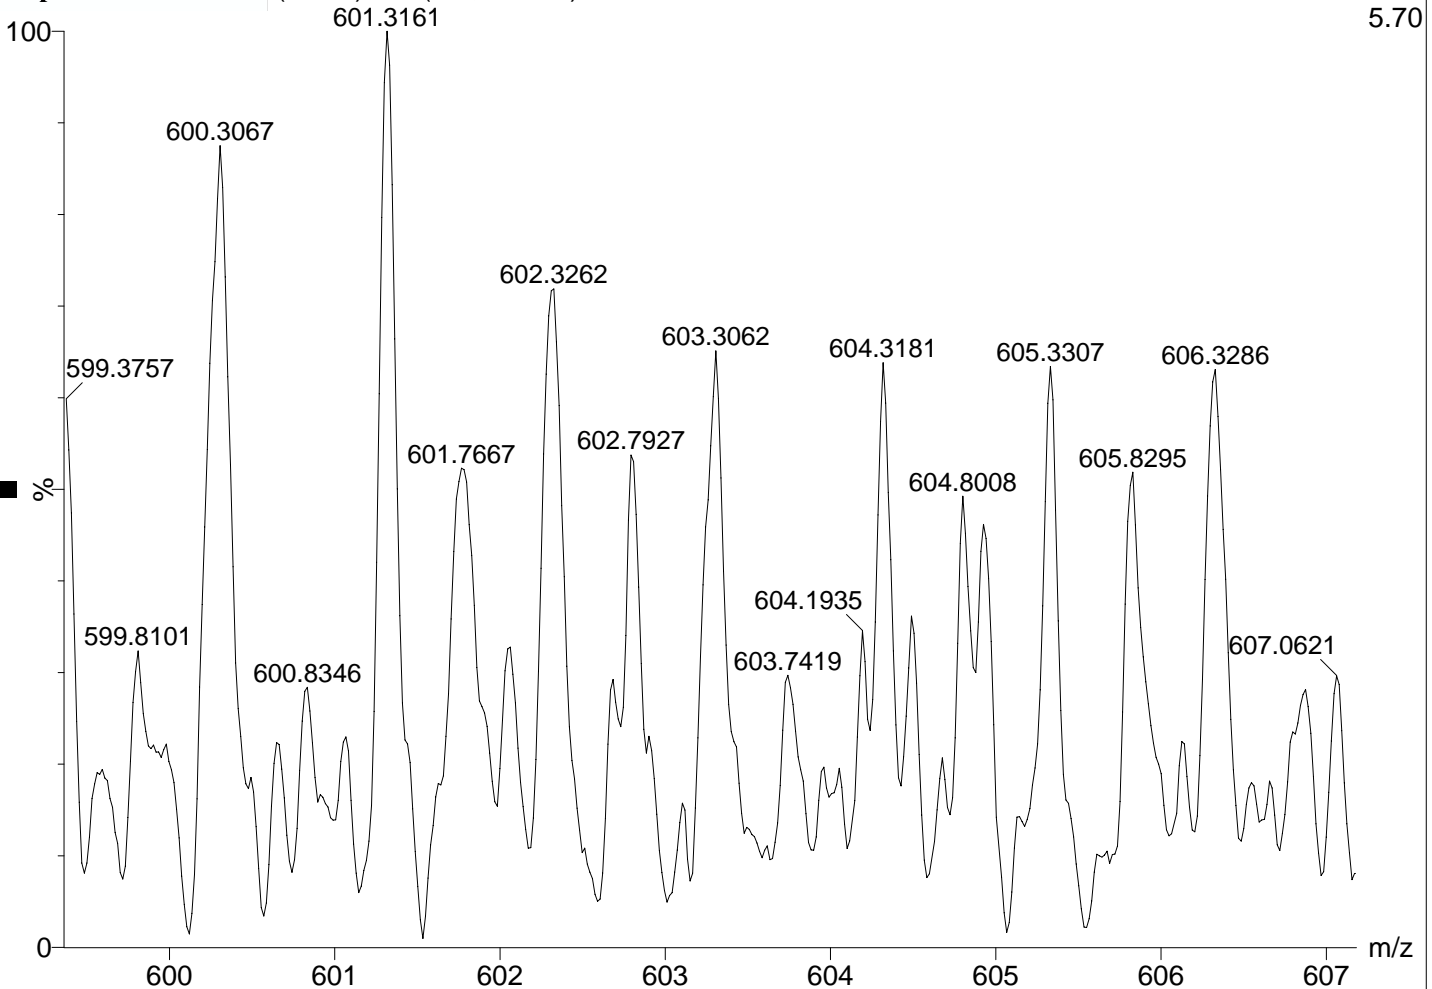

**MASCOT SCIENCE** Mascot Search Results

Peptide View

Peptide 16

MS/MS Fragmentation of **APDQDEIQR**

Found in **PPGB\_HUMAN**, Lysosomal protective protein OS=Homo sapiens GN=CTSA PE=1 SV=2

Match to Query 228: 1197.613788 from(599.814170,2+) intensity(879.0000)

Title: 3: Scan 437 (rt=451.339, f=2, i=2) [C:\Users\synapt\Desktop\28062011 raw\290611 Leandro E1.raw]

Data file 290611 Chris E1.mgf

Click mouse within plot area to zoom in by factor of two about that point

Or,  0 to  Da

Label all possible matches  Label matches used for scoring

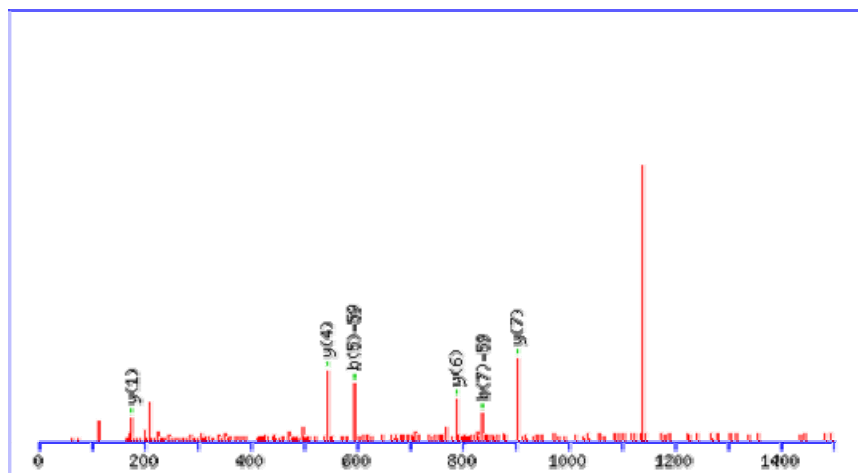

Monoisotopic mass of neutral peptide Mr(calc): 1197.5990

Fixed modifications: GIST-Quat (K),GIST-Quat (N-term) (apply to specified residues or termini only)

Ions Score: 8 Expect: 9.3e+002

Matches : 6/80 fragment ions using 24 most intense peaks ([help](#))

| # | b               | b <sup>++</sup> | b*       | b* <sup>++</sup> | b <sup>0</sup> | b <sup>0++</sup> | Seq. | y               | y <sup>++</sup> | y*       | y* <sup>++</sup> | y <sup>0</sup> | y <sup>0++</sup> | # |
|---|-----------------|-----------------|----------|------------------|----------------|------------------|------|-----------------|-----------------|----------|------------------|----------------|------------------|---|
| 1 | 140.0706        | 70.5389         |          |                  |                |                  | A    |                 |                 |          |                  |                |                  | 9 |
| 2 | 237.1234        | 119.0653        |          |                  |                |                  | P    | 1000.4694       | 500.7383        | 983.4429 | 492.2251         | 982.4589       | 491.7331         | 8 |
| 3 | 352.1503        | 176.5788        |          |                  | 334.1397       | 167.5735         | D    | <b>903.4167</b> | 452.2120        | 886.3901 | 443.6987         | 885.4061       | 443.2067         | 7 |
| 4 | 480.2089        | 240.6081        | 463.1823 | 232.0948         | 462.1983       | 231.6028         | Q    | <b>788.3897</b> | 394.6985        | 771.3632 | 386.1852         | 770.3791       | 385.6932         | 6 |
| 5 | <b>595.2358</b> | 298.1216        | 578.2093 | 289.6083         | 577.2253       | 289.1163         | D    | 660.3311        | 330.6692        | 643.3046 | 322.1559         | 642.3206       | 321.6639         | 5 |
| 6 | 724.2784        | 362.6429        | 707.2519 | 354.1296         | 706.2679       | 353.6376         | E    | <b>545.3042</b> | 273.1557        | 528.2776 | 264.6425         | 527.2936       | 264.1504         | 4 |
| 7 | <b>837.3625</b> | 419.1849        | 820.3359 | 410.6716         | 819.3519       | 410.1796         | I    | 416.2616        | 208.6344        | 399.2350 | 200.1212         |                |                  | 3 |
| 8 | 965.4211        | 483.2142        | 948.3945 | 474.7009         | 947.4105       | 474.2089         | Q    | 303.1775        | 152.0924        | 286.1510 | 143.5791         |                |                  | 2 |
| 9 |                 |                 |          |                  |                |                  | R    | <b>175.1190</b> | 88.0631         | 158.0924 | 79.5498          |                |                  | 1 |

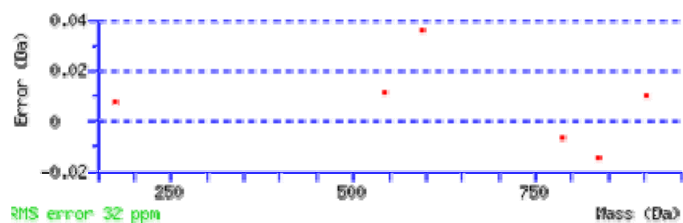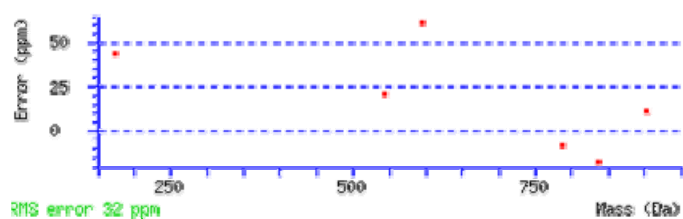

NCBI BLAST search of [APDQDEIQR](#)

(Parameters: blastp, nr protein database, expect=20000, no filter, PAM30)

Other BLAST [web gateways](#)

## All matches to this query

| Score | Mr(calc): | Delta   | Sequence                    |
|-------|-----------|---------|-----------------------------|
| 7.5   | 1197.5990 | 0.0148  | <a href="#">APDQDEIQR</a>   |
| 2.9   | 1197.4166 | 0.1972  | <a href="#">DDDMDENSM</a>   |
| 2.6   | 1197.6353 | -0.0215 | <a href="#">TEAGAPELQR</a>  |
| 2.1   | 1197.5554 | 0.0584  | <a href="#">PADQDSLYY</a>   |
| 2.0   | 1197.5666 | 0.0472  | <a href="#">YPTDSRGEF</a>   |
| 2.0   | 1197.6717 | -0.0579 | <a href="#">LLGALGEGDAR</a> |
| 1.4   | 1197.5990 | 0.0148  | <a href="#">NESVPDSPAR</a>  |

Mascot: <http://www.matrixscience.com/>

Peptide 17 – Run 1 (9.272) Sm (SG, 2x4.00)

1: TOF MS ES+  
49.8

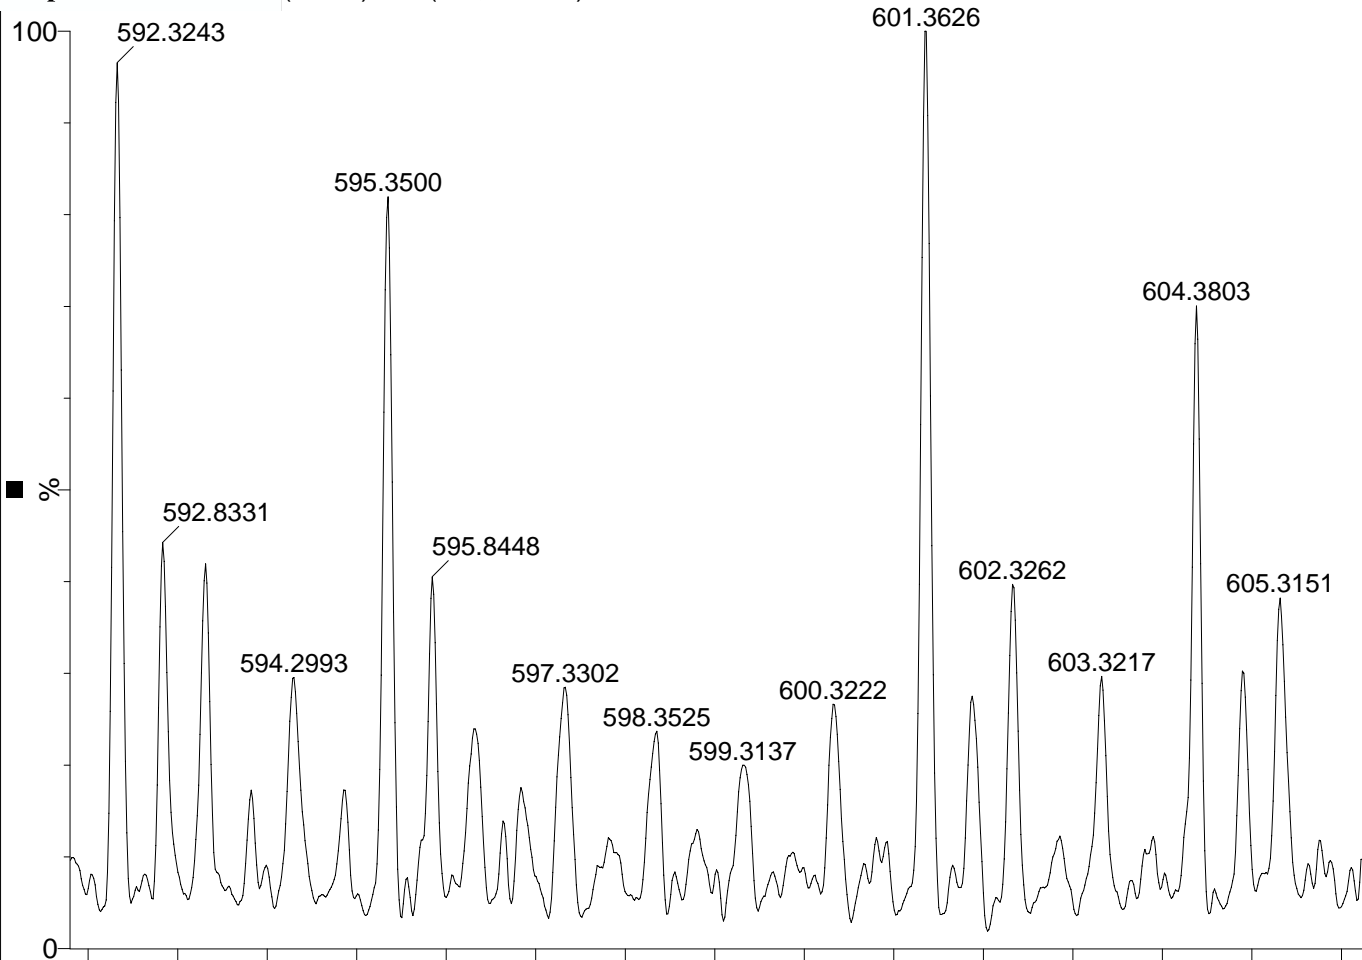

Peptide 17 – Run 2 539 (10.046) Sm (SG, 2x4.00)

1: TOF MS ES+  
21.7

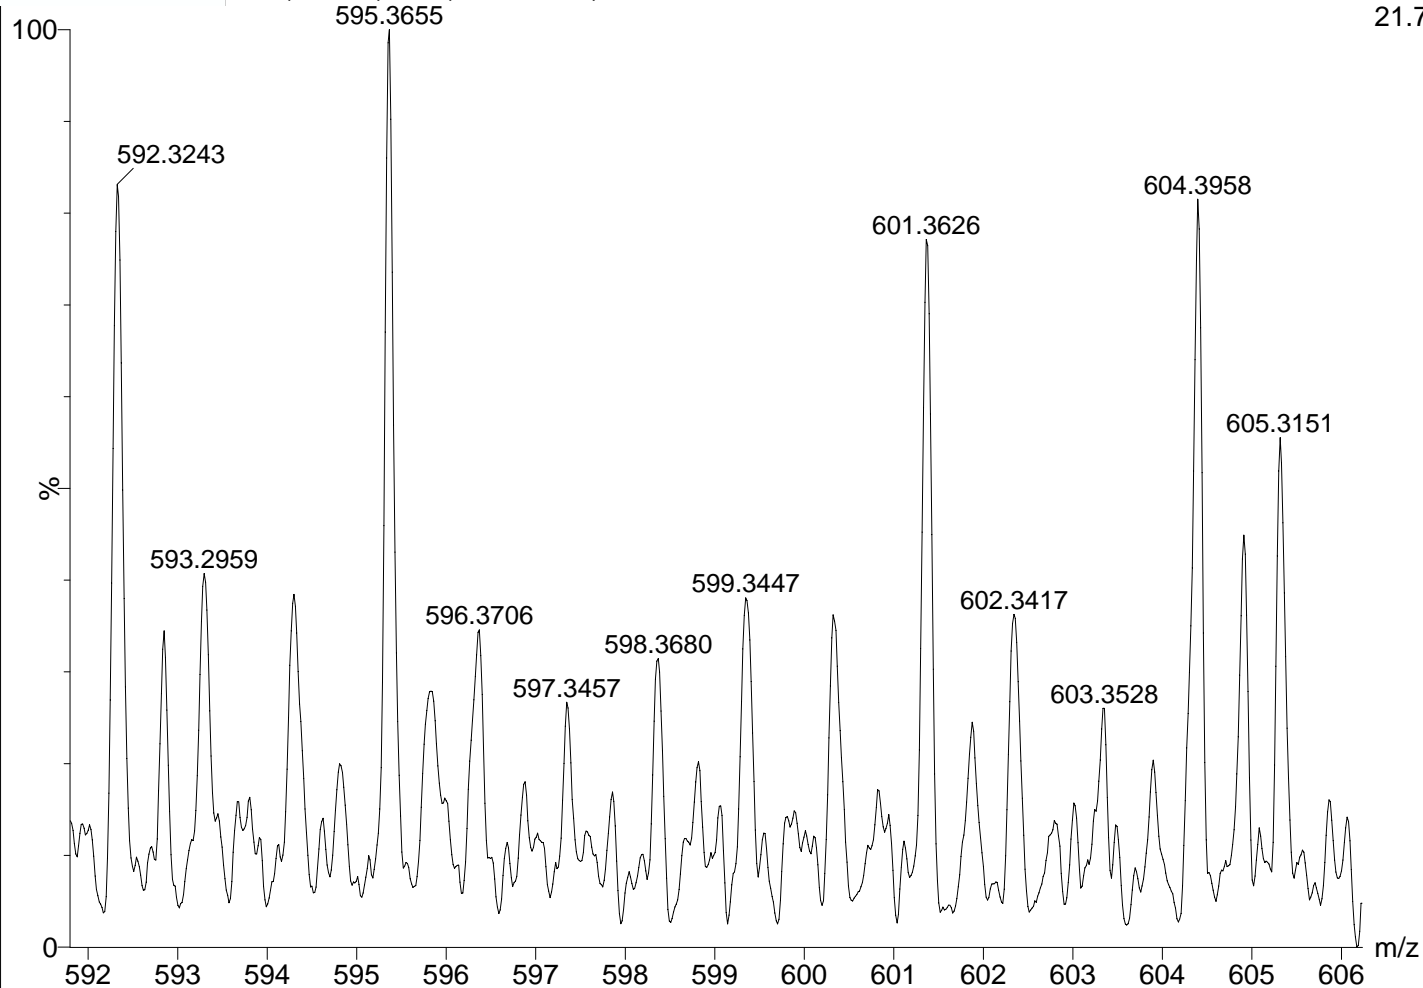

**MASCOT SCIENCE** Mascot Search Results

**Peptide View** **Peptide 17**

MS/MS Fragmentation of **GEGLPKTDL**  
 Found in **PCDA3\_HUMAN**, Protocadherin alpha-3 OS=Homo sapiens GN=PCDHA3 PE=1 SV=1

Match to Query 231: 1200.710668 from(601.362610,2+) intensity(1202.0000)  
 Title: 37: Scan 538 (rt=555.314, f=4, i=7) [C:\Users\synapt\Desktop\28062011 raw\290611 Leandro E1.raw]  
 Data file 290611 Chris E1.mgf

Click mouse within plot area to zoom in by factor of two about that point  
 Or,  100 to  Da   
 Label all possible matches  Label matches used for scoring

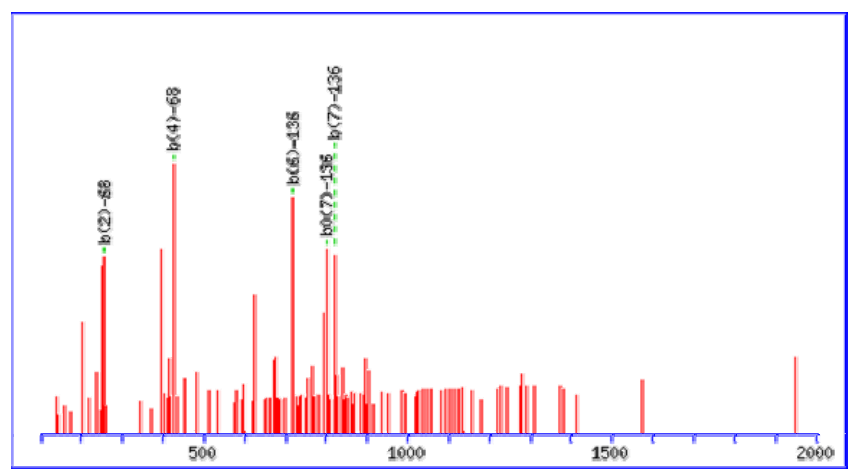

Monoisotopic mass of neutral peptide Mr(calc): 1200.7990  
 Fixed modifications: GIST-Quat:2H(9) (K),GIST-Quat:2H(9) (N-term) (apply to specified residues or termini only)  
 Ions Score: 8 Expect: 7e+002  
 Matches : 5/76 fragment ions using 22 most intense peaks ([help](#))

| # | b               | b <sup>++</sup> | b*       | b <sup>+++</sup> | b <sup>0</sup>  | b <sup>0++</sup> | Seq. | y        | y <sup>++</sup> | y*       | y <sup>+++</sup> | y <sup>0</sup> | y <sup>0++</sup> | # |
|---|-----------------|-----------------|----------|------------------|-----------------|------------------|------|----------|-----------------|----------|------------------|----------------|------------------|---|
| 1 | 126.0550        | 63.5311         |          |                  |                 |                  | G    |          |                 |          |                  |                |                  | 9 |
| 2 | <b>255.0975</b> | 128.0524        |          |                  | 237.0870        | 119.0471         | E    | 940.4986 | 470.7529        | 923.4720 | 462.2397         | 922.4880       | 461.7477         | 8 |
| 3 | 312.1190        | 156.5631        |          |                  | 294.1084        | 147.5579         | G    | 811.4560 | 406.2316        | 794.4294 | 397.7184         | 793.4454       | 397.2264         | 7 |
| 4 | <b>425.2031</b> | 213.1052        |          |                  | 407.1925        | 204.0999         | L    | 754.4345 | 377.7209        | 737.4080 | 369.2076         | 736.4240       | 368.7156         | 6 |
| 5 | 522.2558        | 261.6316        |          |                  | 504.2453        | 252.6263         | P    | 641.3505 | 321.1789        | 624.3239 | 312.6656         | 623.3399       | 312.1736         | 5 |
| 6 | <b>718.3770</b> | 359.6921        | 701.3505 | 351.1789         | 700.3665        | 350.6869         | K    | 544.2977 | 272.6525        | 527.2712 | 264.1392         | 526.2871       | 263.6472         | 4 |
| 7 | <b>819.4247</b> | 410.2160        | 802.3981 | 401.7027         | <b>801.4141</b> | 401.2107         | T    | 348.1765 | 174.5919        |          |                  | 330.1660       | 165.5866         | 3 |
| 8 | 934.4516        | 467.7295        | 917.4251 | 459.2162         | 916.4411        | 458.7242         | D    | 247.1288 | 124.0681        |          |                  | 229.1183       | 115.0628         | 2 |
| 9 |                 |                 |          |                  |                 |                  | L    | 132.1019 | 66.5546         |          |                  |                |                  | 1 |

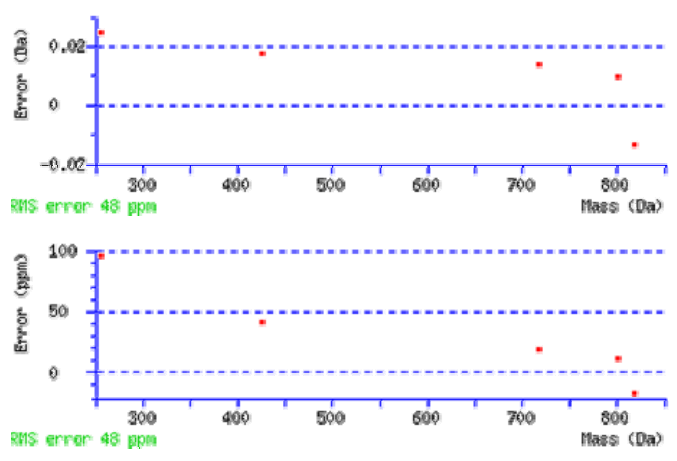

NCBI BLAST search of [GEGLPKTDL](#)  
 (Parameters: blastp, nr protein database, expect=20000, no filter, PAM30)  
 Other BLAST [web gateways](#)

All matches to this query

| Score | Mr(calc): | Delta   | Sequence                    |
|-------|-----------|---------|-----------------------------|
| 8.2   | 1200.7990 | -0.0883 | <a href="#">GEGLPKTDL</a>   |
| 3.3   | 1200.7990 | -0.0883 | <a href="#">STPAKPTVE</a>   |
| 0.9   | 1200.8354 | -0.1247 | <a href="#">SVGIKPSLE</a>   |
| 0.8   | 1200.7289 | -0.0182 | <a href="#">YAQAAEALRH</a>  |
| 0.3   | 1200.8353 | -0.1247 | <a href="#">ADAV AELKL</a>  |
| 0.3   | 1200.8717 | -0.1611 | <a href="#">DAIGISLLK</a>   |
| 0.3   | 1200.6548 | 0.0559  | <a href="#">EGGLISSSTQS</a> |
| 0.3   | 1200.6597 | 0.0510  | <a href="#">WGLTVMDLM</a>   |
| 0.3   | 1200.6563 | 0.0544  | <a href="#">WLGPCDIVY</a>   |

Mascot: <http://www.matrixscience.com/>

Peptide 18 – Run 1 | 94 (1.701) Sm (SG, 2x4.00)

1: TOF MS ES+  
86.6

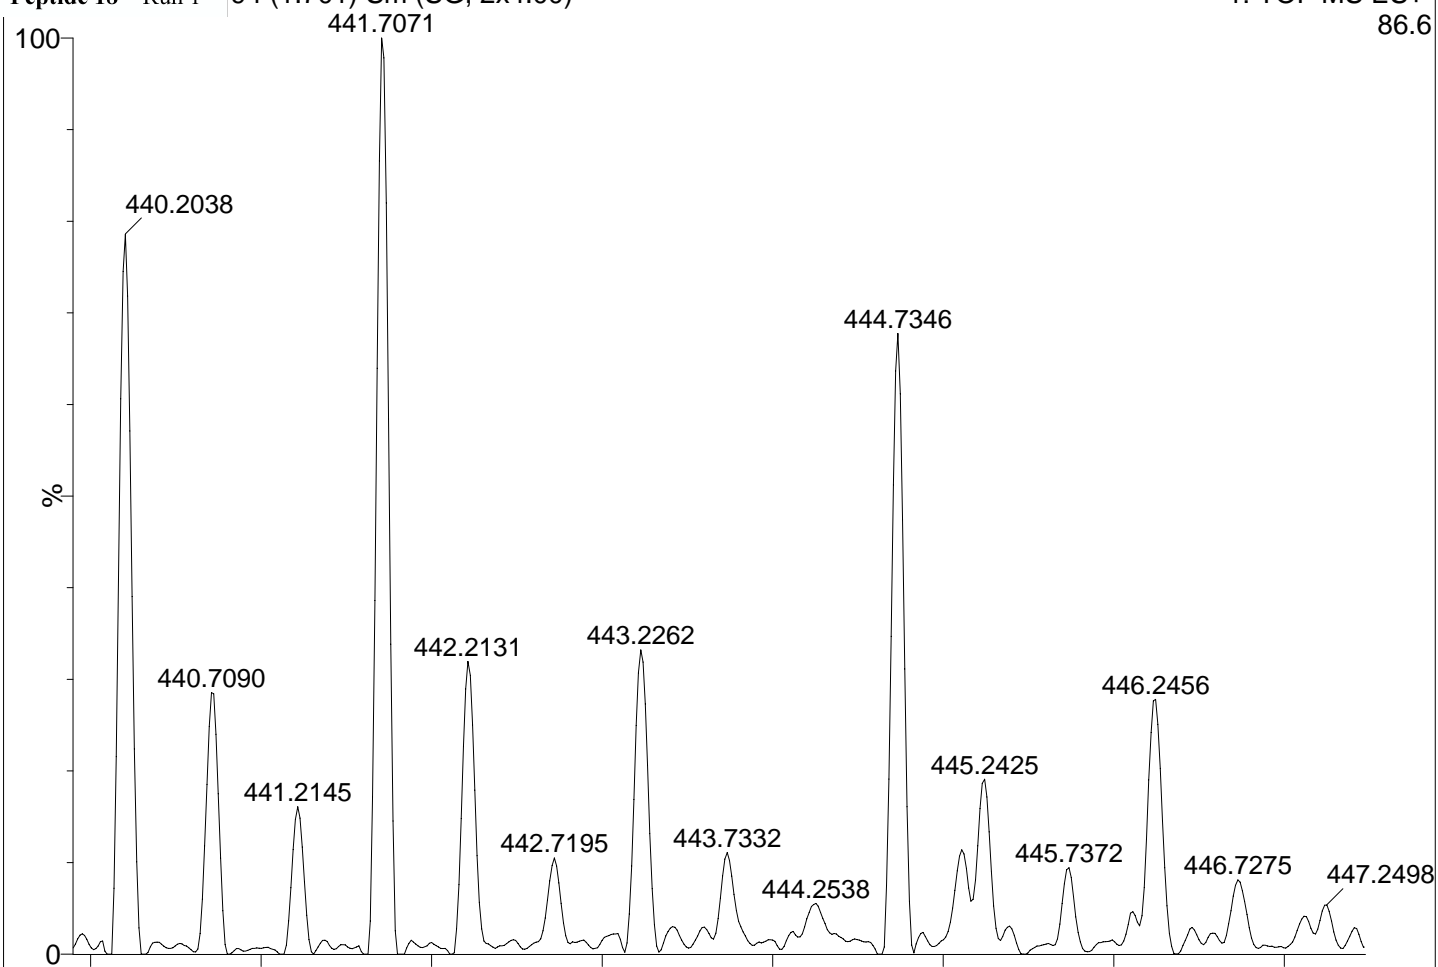

Peptide 18 – Run 2 | 92 (1.701) Sm (SG, 2x4.00)

1: TOF MS ES+  
8.51

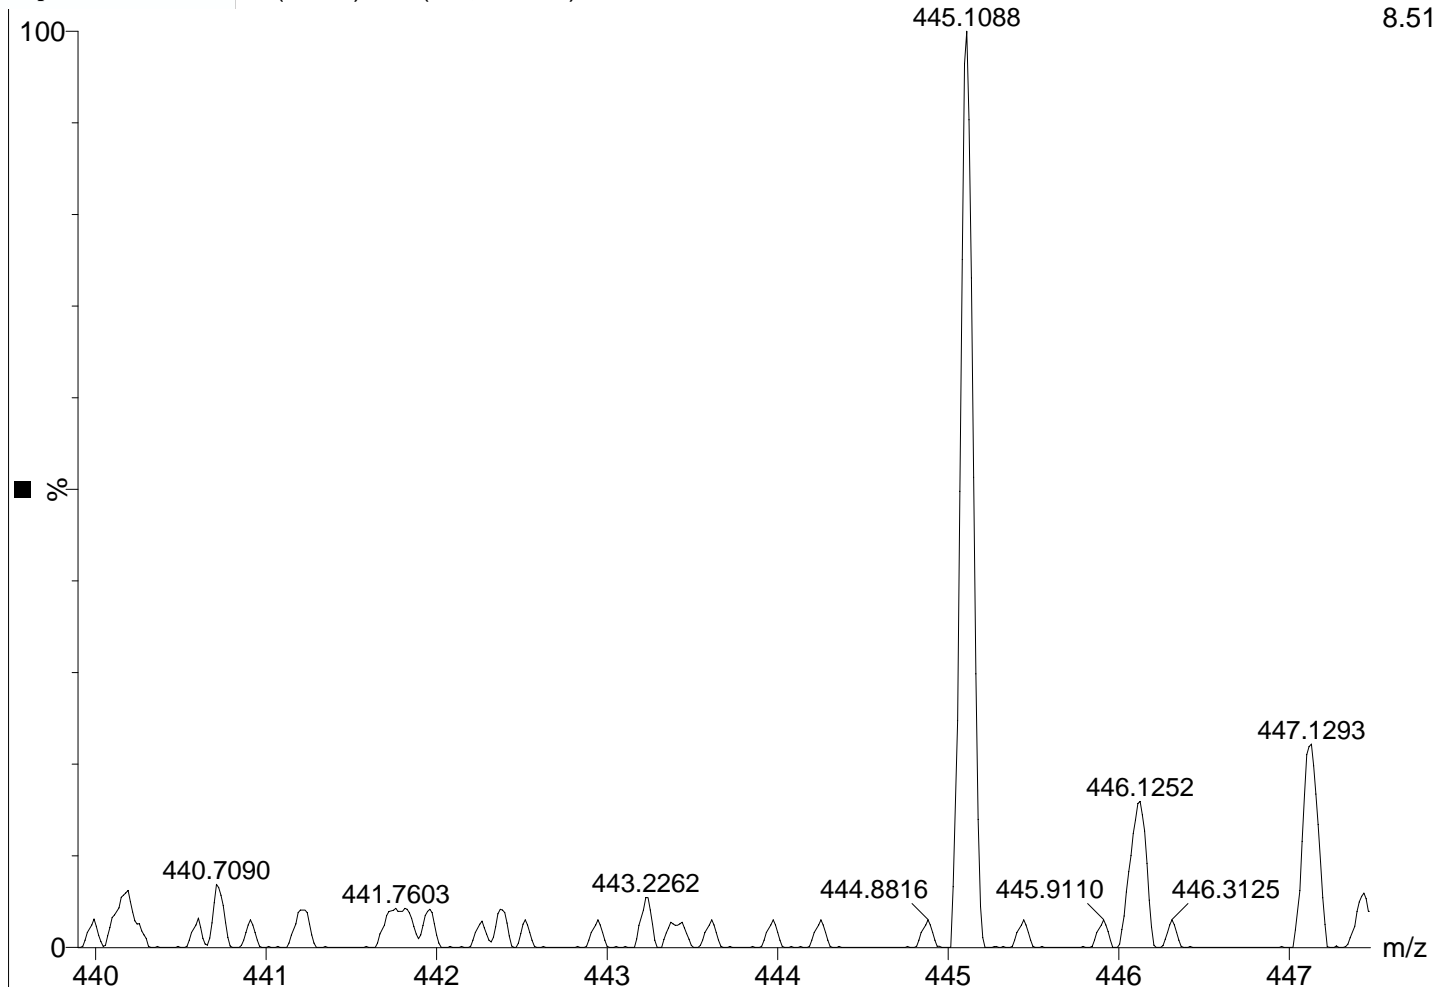



**MASCOT SCIENCE** Mascot Search Results

**Peptide View**

**Peptide 18**

MS/MS Fragmentation of **EAMAAIF**

Found in **M3K2\_HUMAN**, Mitogen-activated protein kinase kinase kinase 2 OS=Homo sapiens GN=MAP3K2 PE=1 SV=2

Match to Query 23: 881.453108 from(441.733830,2+) intensity(1104.0000)

Title: 1: Scan 99 (rt=103.091, f=3, i=1) [C:\Users\synapt\Desktop\28062011 raw\290611 Leandro E1.raw]

Data file 290611 Chris E1.mgf

Click mouse within plot area to zoom in by factor of two about that point

Or, Plot from 0 to 1600 Da Full range

Label all possible matches Label matches used for scoring

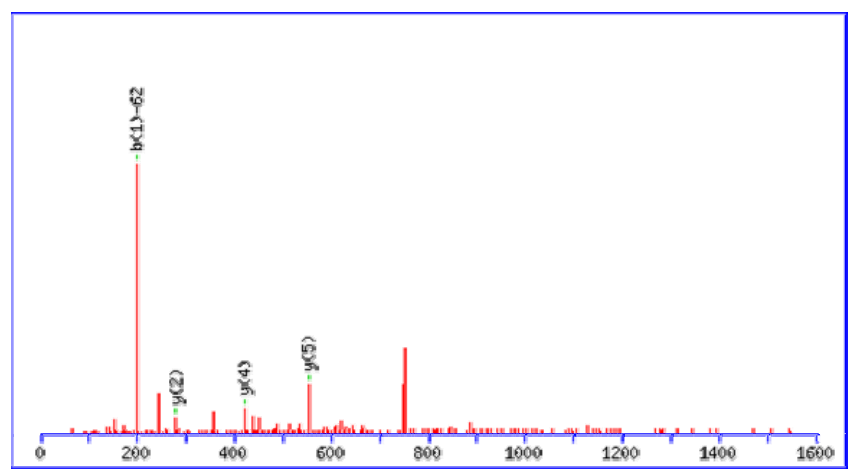

Monoisotopic mass of neutral peptide Mr(calc): 881.4760

Fixed modifications: GIST-Quat:2H(3) (K),GIST-Quat:2H(3) (N-term) (apply to specified residues or termini only)

Ions Score: 3 Expect: 2e+003

Matches : 4/36 fragment ions using 17 most intense peaks (help)

| # | b        | b <sup>++</sup> | b <sup>0</sup> | b <sup>0++</sup> | Seq. | y        | y <sup>++</sup> | # |
|---|----------|-----------------|----------------|------------------|------|----------|-----------------|---|
| 1 | 198.0761 | 99.5417         | 180.0655       | 90.5364          | E    |          |                 | 7 |
| 2 | 269.1132 | 135.0602        | 251.1026       | 126.0550         | A    | 623.3221 | 312.1647        | 6 |
| 3 | 400.1537 | 200.5805        | 382.1431       | 191.5752         | M    | 552.2850 | 276.6462        | 5 |
| 4 | 471.1908 | 236.0990        | 453.1802       | 227.0938         | A    | 421.2445 | 211.1259        | 4 |
| 5 | 542.2279 | 271.6176        | 524.2173       | 262.6123         | A    | 350.2074 | 175.6074        | 3 |
| 6 | 655.3120 | 328.1596        | 637.3014       | 319.1543         | I    | 279.1703 | 140.0888        | 2 |
| 7 |          |                 |                |                  | F    | 166.0863 | 83.5468         | 1 |

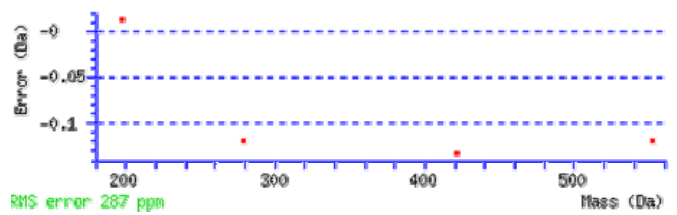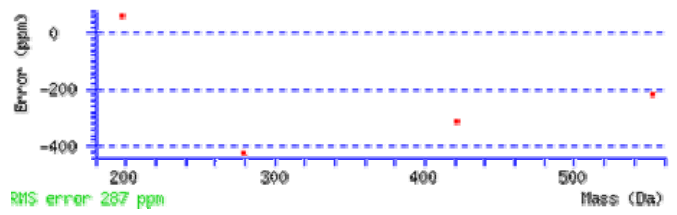

NCBI BLAST search of [EAMAAIF](#)

(Parameters: blastp, nr protein database, expect=20000, no filter, PAM30)

Other BLAST [web gateways](#)

All matches to this query

| Score | Mr(calc): | Delta | Sequence |
|-------|-----------|-------|----------|
|-------|-----------|-------|----------|

|     |          |         |                         |
|-----|----------|---------|-------------------------|
| 7.4 | 881.4574 | -0.0043 | <a href="#">ESFGEIA</a> |
| 5.0 | 881.4057 | 0.0474  | <a href="#">ESEATSE</a> |
| 5.0 | 881.4607 | -0.0076 | <a href="#">ESLSTLC</a> |
| 4.9 | 881.5050 | -0.0519 | <a href="#">ESPVAIH</a> |
| 3.2 | 881.4760 | -0.0229 | <a href="#">EAMAAIF</a> |
| 2.5 | 881.5414 | -0.0883 | <a href="#">EAGLLH</a>  |
| 2.5 | 881.5414 | -0.0883 | <a href="#">EALGLHL</a> |
| 2.5 | 881.4937 | -0.0406 | <a href="#">EALVASY</a> |
| 2.5 | 881.3880 | 0.0652  | <a href="#">EAMASDE</a> |
| 2.5 | 881.3880 | 0.0652  | <a href="#">EAMEDAS</a> |

Mascot: <http://www.matrixscience.com/>

Peptide 19 – Run 1 562 (12.775) Sm (SG, 2x4.00)

1: TOF MS ES+  
259

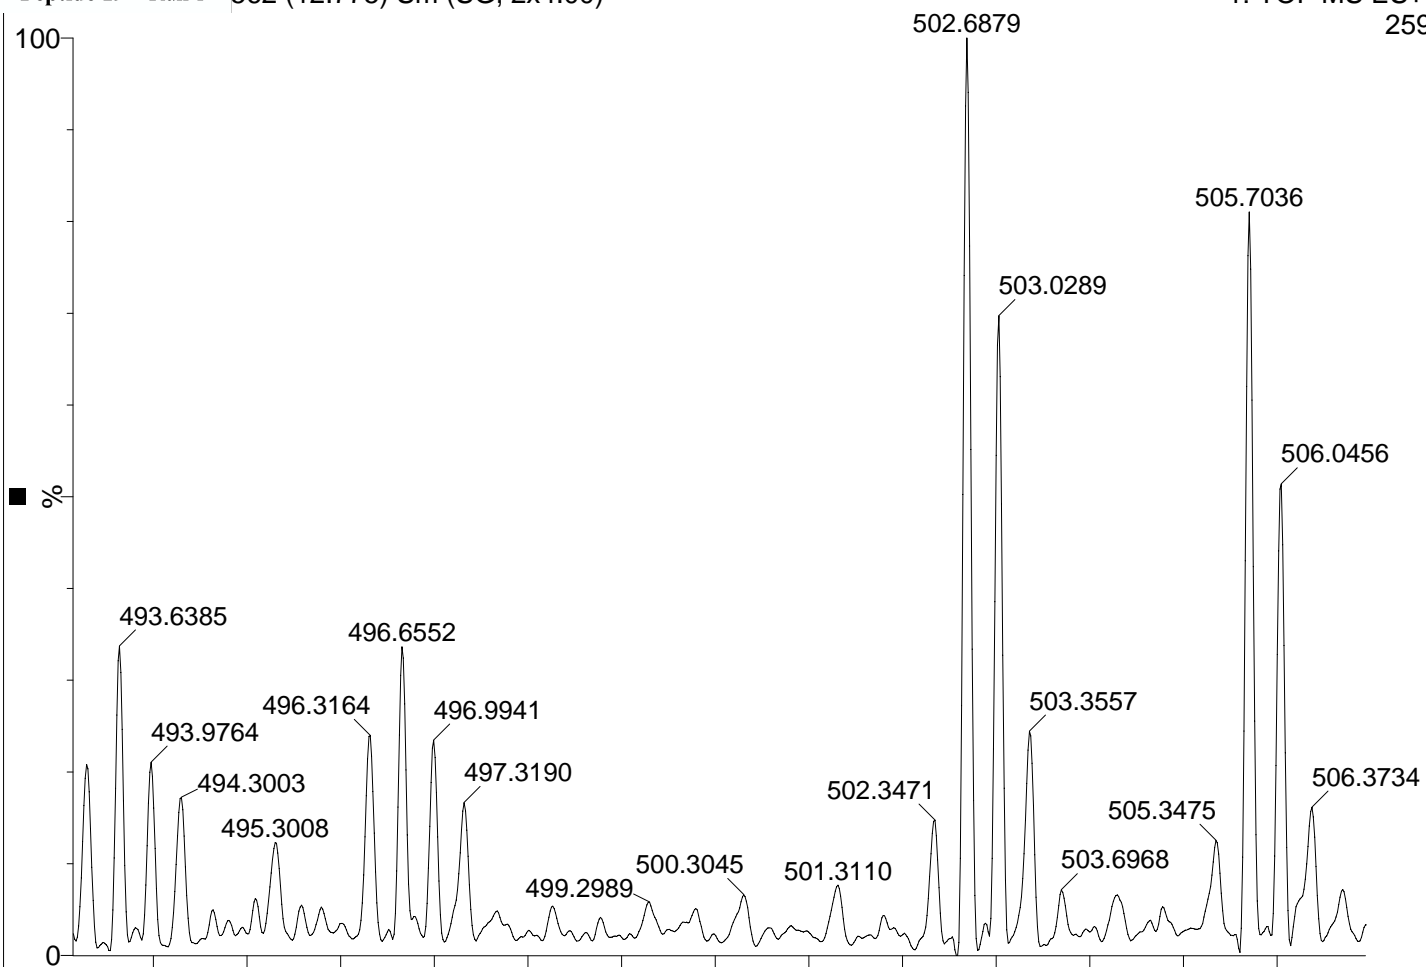

Peptide 19 – Run 2 701 (13.890) Sm (SG, 2x4.00)

1: TOF MS ES+  
103

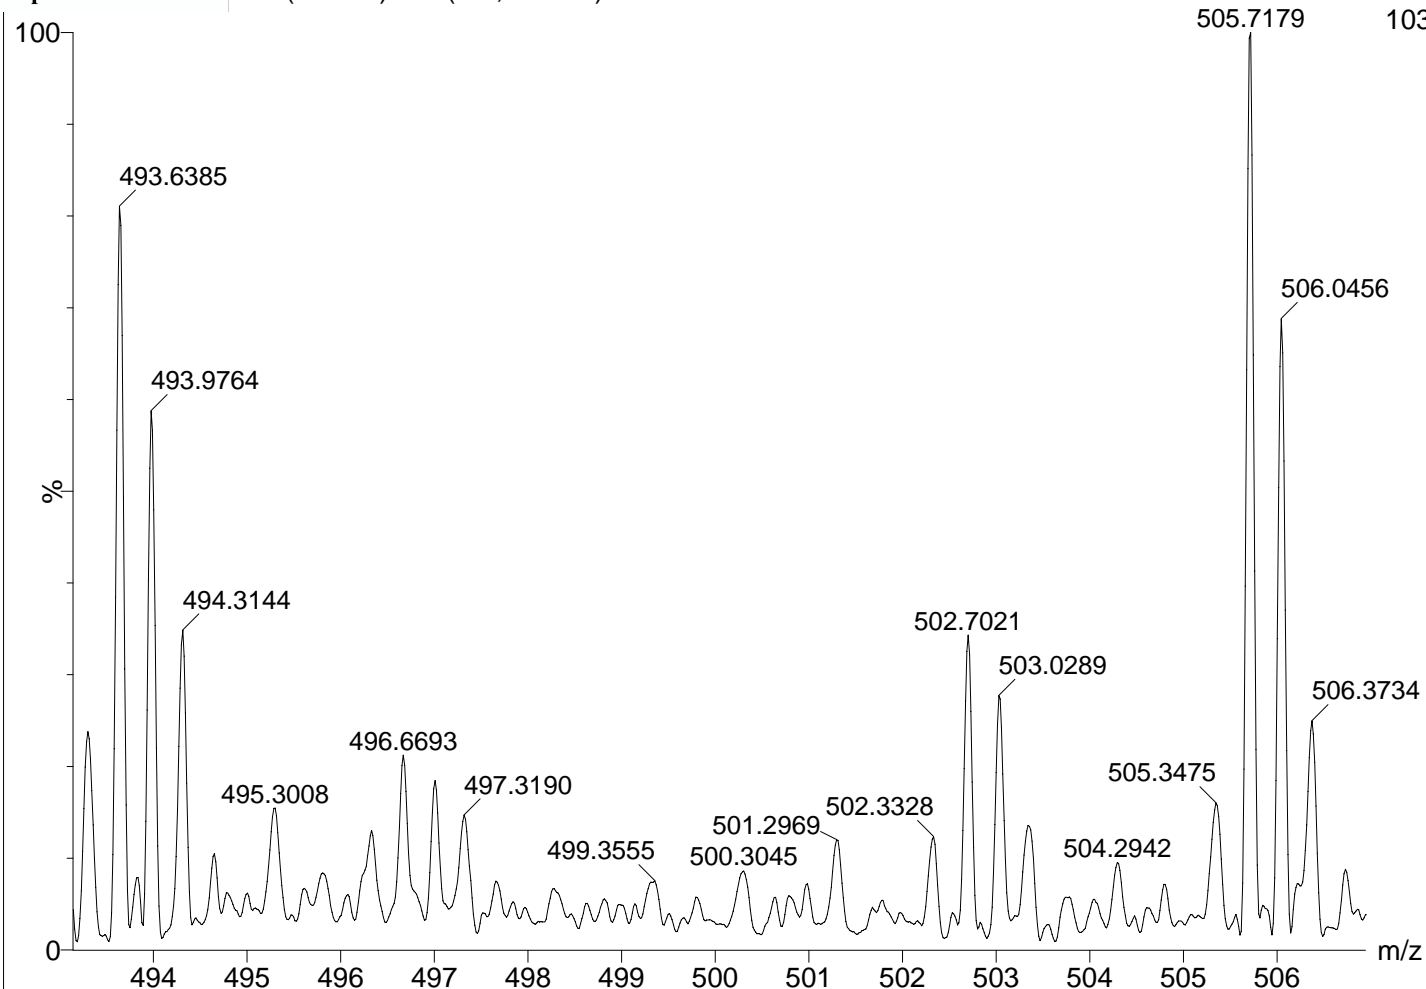

**MASCOT SCIENCE** Mascot Search Results

**Peptide View**

**Peptide 19**

MS/MS Fragmentation of **EIKKQLLLI**

Found in **CDC23\_HUMAN**, Cell division cycle protein 23 homolog OS=Homo sapiens GN=CDC23 PE=1 SV=3

Match to Query 394: 1505.114262 from(502.712030,3+) intensity(2341.0000)

Title: 234: Scan 737 (rt=760.34, f=3, i=50) [C:\Users\synapt\Desktop\28062011 raw\290611 Leandro E1.raw]

Data file 290611 Chris E1.mgf

Click mouse within plot area to zoom in by factor of two about that point

Or,  to  Da

Label all possible matches  Label matches used for scoring

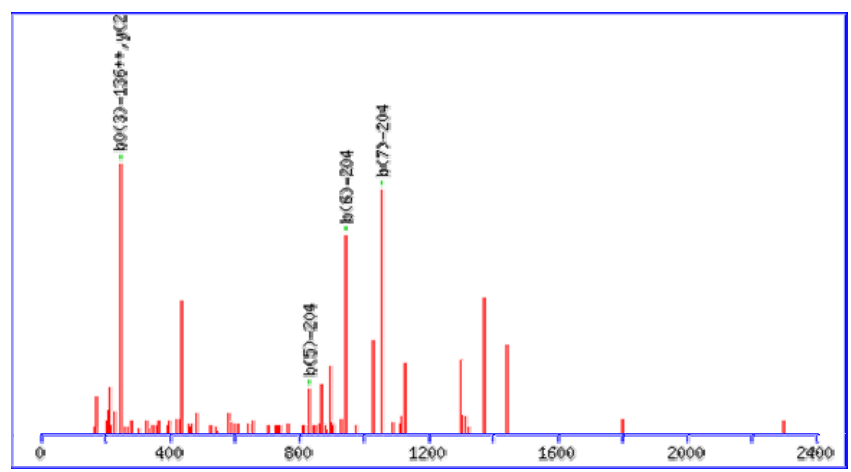

Monoisotopic mass of neutral peptide Mr(calc): 1505.1906

Fixed modifications: GIST-Quat:2H(9) (K),GIST-Quat:2H(9) (N-term) (apply to specified residues or termini only)

Ions Score: 5 Expect: 1.1e+003

Matches : 5/68 fragment ions using 12 most intense peaks ([help](#))

| # | b         | b <sup>++</sup> | b*        | b <sup>+++</sup> | b <sup>0</sup> | b <sup>0++</sup> | Seq. | y         | y <sup>++</sup> | y*        | y <sup>+++</sup> | # |
|---|-----------|-----------------|-----------|------------------|----------------|------------------|------|-----------|-----------------|-----------|------------------|---|
| 1 | 198.0761  | 99.5417         |           |                  | 180.0655       | 90.5364          | E    |           |                 |           |                  | 9 |
| 2 | 311.1601  | 156.0837        |           |                  | 293.1496       | 147.0784         | I    | 1104.7391 | 552.8732        | 1087.7125 | 544.3599         | 8 |
| 3 | 507.2813  | 254.1443        | 490.2548  | 245.6310         | 489.2708       | 245.1390         | K    | 991.6550  | 496.3312        | 974.6285  | 487.8179         | 7 |
| 4 | 703.4025  | 352.2049        | 686.3760  | 343.6916         | 685.3919       | 343.1996         | K    | 795.5339  | 398.2706        | 778.5073  | 389.7573         | 6 |
| 5 | 831.4611  | 416.2342        | 814.4345  | 407.7209         | 813.4505       | 407.2289         | Q    | 599.4127  | 300.2100        | 582.3861  | 291.6967         | 5 |
| 6 | 944.5451  | 472.7762        | 927.5186  | 464.2629         | 926.5346       | 463.7709         | L    | 471.3541  | 236.1807        |           |                  | 4 |
| 7 | 1057.6292 | 529.3182        | 1040.6027 | 520.8050         | 1039.6186      | 520.3130         | L    | 358.2700  | 179.6387        |           |                  | 3 |
| 8 | 1170.7133 | 585.8603        | 1153.6867 | 577.3470         | 1152.7027      | 576.8550         | L    | 245.1860  | 123.0966        |           |                  | 2 |
| 9 |           |                 |           |                  |                |                  | I    | 132.1019  | 66.5546         |           |                  | 1 |

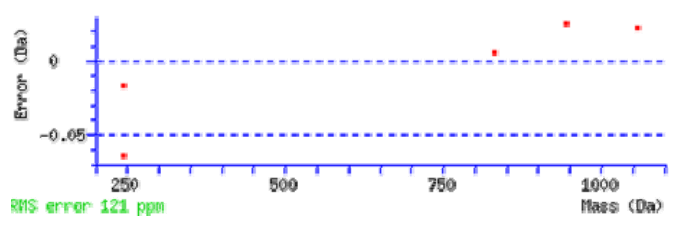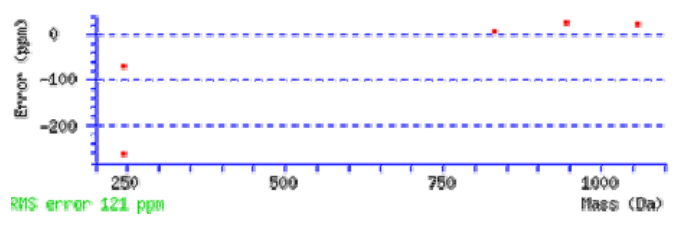

NCBI BLAST search of [EIKKQLLLI](#)

(Parameters: blastp, nr protein database, expect=20000, no filter, PAM30)

Other BLAST [web gateways](#)

All matches to this query

| Score | Mr(calc): | Delta   | Sequence                       |
|-------|-----------|---------|--------------------------------|
| 23.8  | 1504.9062 | 0.2081  | <a href="#">LAGALLEEAEQLL</a>  |
| 14.8  | 1504.9440 | 0.1703  | <a href="#">AVAALLWAAVTRAG</a> |
| 12.9  | 1504.9287 | 0.1856  | <a href="#">LQIAIDNSRNIL</a>   |
| 12.9  | 1504.8811 | 0.2332  | <a href="#">SGPSPLEETRALL</a>  |
| 12.7  | 1504.9790 | 0.1352  | <a href="#">GSPALLLLTTLTGT</a> |
| 12.7  | 1504.9976 | 0.1166  | <a href="#">LOALLMIIGALTL</a>  |
| 12.2  | 1504.9579 | 0.1564  | <a href="#">VYNLINEPLVIF</a>   |
| 10.0  | 1504.9633 | 0.1510  | <a href="#">MLLLEKMQD</a>      |
| 5.0   | 1505.1178 | -0.0036 | <a href="#">KIKQEILPE</a>      |
| 5.0   | 1505.1906 | -0.0763 | <a href="#">EIKKOLLI</a>       |

Mascot: <http://www.matrixscience.com/>
